# Supplementary material for: Ritter-type iodo( iii )amidation of unactivated alkynes for the stereoselective synthesis of multisubstituted enamides
Source: Royal Society of Chemistry journal article supplement (doi:10.1039/d1sc05240c), 2021-01-01

## Supplementary Information

### Ritter-Type Iodo(III)amidation of Unactivated Alkynes for the Synthesis of Multisubstituted Enamides

Jinkui Chai,<sup>a,b</sup> Wei Ding,<sup>b,c</sup> Chen Wang,<sup>d</sup> Shingo Ito,<sup>b</sup> Junliang Wu,<sup>a\*</sup> Naohiko Yoshikai<sup>b,e\*</sup>

<sup>a</sup> *College of Chemistry and Institute of Green Catalysis, Zhengzhou University, Zhengzhou 450001, P.R. China*

<sup>b</sup> *Division of Chemistry and Biological Chemistry, School of Physical and Mathematical Sciences, Nanyang Technological University, Singapore 637371, Singapore*

<sup>c</sup> *Division of Molecular Catalysis and Synthesis, Henan Institute of Advanced Technology, Zhengzhou University, Zhengzhou 450001, P.R. China*

<sup>d</sup> *Zhejiang Key Laboratory of Alternative Technologies for Fine Chemical Process, Shaoxing University, Shaoxing 312000, P.R. China*

<sup>e</sup> *Graduate School of Pharmaceutical Sciences, Tohoku University, 6-3 Aoba, Aramaki, Aoba-ku, Sendai 980-8578, Japan*

### Contents

|                                                       |     |
|-------------------------------------------------------|-----|
| Materials and Methods .....                           | S2  |
| Optimization of Reaction Conditions .....             | S4  |
| General Procedures and Product Characterization ..... | S6  |
| Control Experiments.....                              | S31 |
| Product Transformations.....                          | S33 |
| DFT Calculations.....                                 | S42 |
| Reference .....                                       | S51 |
| NMR Spectra .....                                     | S53 |

## Materials and Methods

**General.** All reactions dealing with air- or moisture-sensitive compound were performed by standard Schlenk techniques in oven-dried reaction vessels under nitrogen atmosphere or in the argon-filled glove box. Analytical thin-layer chromatography (TLC) was performed on Merck 60 F254 silica gel plates.  $^1\text{H}$  and  $^{13}\text{C}$  nuclear magnetic resonance (NMR) spectra were recorded on Bruker AV-400 (400 MHz) or Bruker AV-500 (500 MHz) spectrometers.  $^1\text{H}$  and  $^{13}\text{C}$  NMR spectra are reported in parts per million (ppm) downfield from an internal standard, tetramethylsilane (0 ppm) and  $\text{CHCl}_3$  (77.0 ppm), or MeOH (3.31 ppm) and MeOH (49.00 ppm), respectively. High-resolution mass spectra (HRMS) were obtained with a Q-ToF Premier LC HR mass spectrometer. Melting points were determined using a capillary melting point apparatus and are uncorrected.

**Materials.** Unless otherwise noted, commercial reagents were purchased from Aldrich, Alfa Aesar, and other commercial suppliers and were used as received. MeCN and DCM were distilled over  $\text{CaH}_2$  and stored under  $\text{N}_2$ . THF was distilled over Na and stored under  $\text{N}_2$ . Hexafluoroisopropanol (HFIP) was distilled over Mg and stored under  $\text{N}_2$ . Anhydrous DMF (Alfa Aesar) were used without further purification and stored under  $\text{N}_2$ . Deionized water was used for the reaction, while tap water was used in the workup procedure. Alkynes **2d**,<sup>1</sup> **2h**,<sup>2</sup> **2i**,<sup>3</sup> **2j-2p**,<sup>4</sup> and **2q**<sup>5</sup> were prepared according to the literature procedure, and other alkynes were purchased from commercial suppliers. All nitriles were purchased from commercial suppliers, and except for MeCN, used as received. 3,3-Bis(trifluoromethyl)-1 $\lambda^3$ -benzo[*d*][1,2]iodaoxol-1(3*H*)-yl trifluoromethanesulfonate (benziodoxole triflate, BXT, **1**) was prepared according to the literature procedure.<sup>4a</sup>

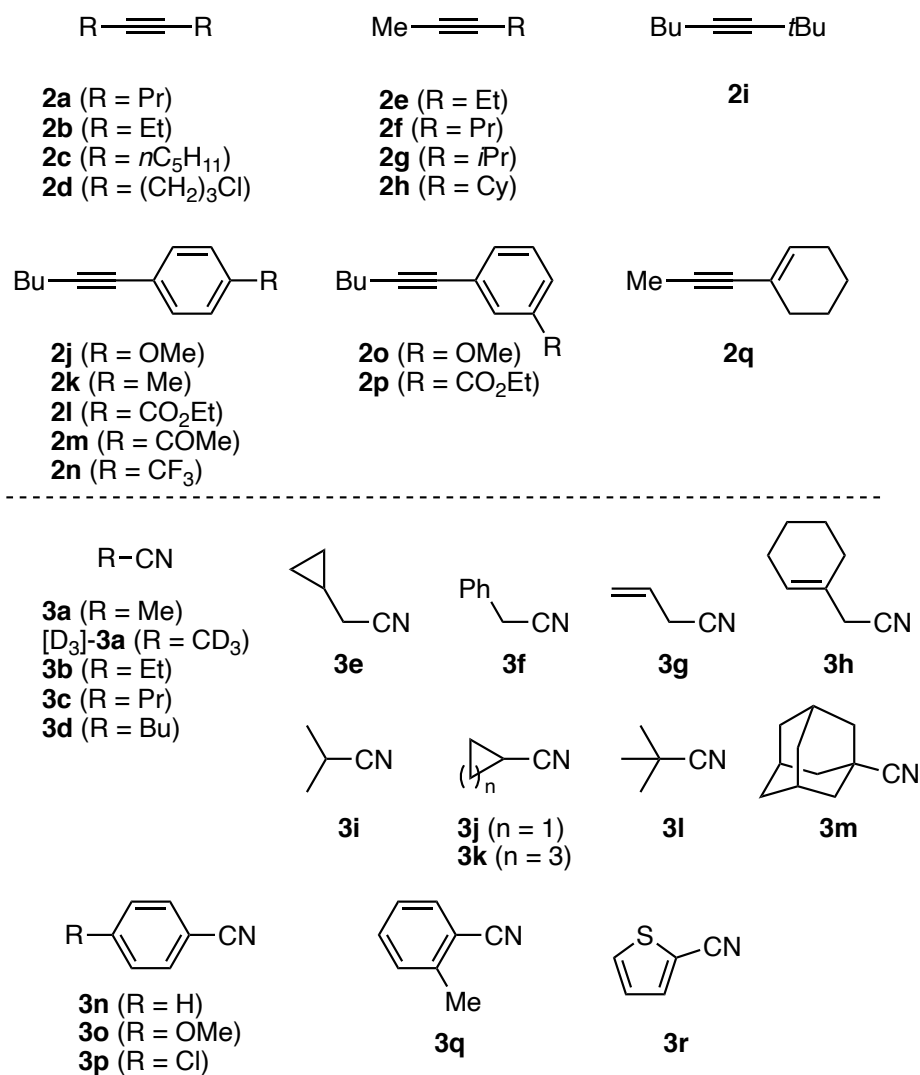

**Figure S1.** Alkynes and nitriles used in this study.

## Optimization of Reaction Conditions

**Table S1.** Iodo(III)acetamidation of alkyne **2a** in MeCN<sup>[a]</sup>

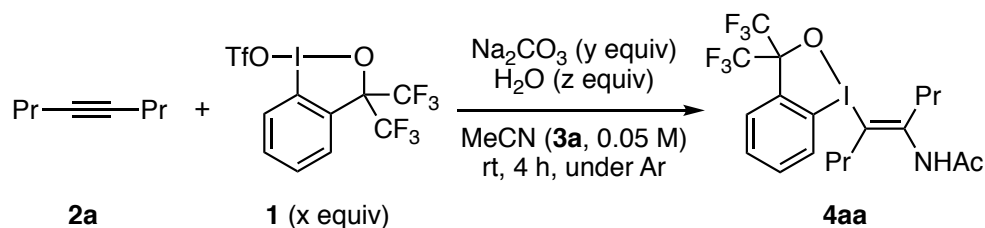

| entry             | x   | y   | z   | yield (%) <sup>[b]</sup> |
|-------------------|-----|-----|-----|--------------------------|
| 1                 | 1.5 | 1.0 | 2.0 | 40                       |
| 2                 | 1.5 | 2.0 | 2.0 | 61                       |
| 3                 | 1.5 | 3.0 | 2.0 | 66                       |
| 4                 | 1.5 | 3.0 | 1.5 | 71                       |
| 5                 | 1.5 | 3.0 | 1.0 | 78                       |
| 6                 | 2.0 | 3.0 | 1.0 | 90                       |
| 7 <sup>[c]</sup>  | 2.0 | 3.0 | 1.0 | 79                       |
| 8 <sup>[d]</sup>  | 2.0 | 3.0 | 1.0 | 83                       |
| 9 <sup>[e]</sup>  | 2.0 | 3.0 | 1.0 | 90                       |
|                   |     |     |     |                          |
| 10 <sup>[f]</sup> | 1.5 | 3.0 | 0   | 31                       |
| 11 <sup>[f]</sup> | 1.5 | 3.0 | 0.5 | 65                       |
| 12 <sup>[f]</sup> | 1.5 | 3.0 | 1.0 | 54                       |
| 13 <sup>[f]</sup> | 1.5 | 3.0 | 2.0 | 48                       |

[a] The reaction was performed on a 0.1 mmol scale. [b] Determined by <sup>19</sup>F NMR using 1,4-bis(trifluoromethyl)benzene as the internal standard. [c] Performed at 0.4 M. [d] Performed at 0.2 M. [e] Performed at 0.1 M. [f] The reaction was set up in an open air at a concentration of 0.2 M. Caution is needed for these entries as significant batch-to-batch variation was observed.

**Table S2.** Iodo(III)acetamidation of alkyne **2a** in HFIP<sup>[a]</sup>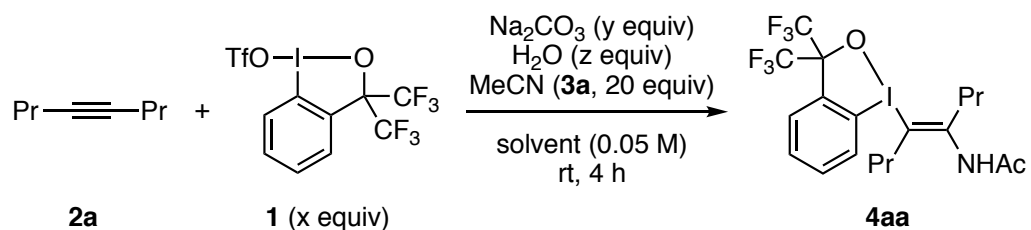

| entry             | x   | y   | z   | solvent | yield (%) <sup>[b]</sup> |
|-------------------|-----|-----|-----|---------|--------------------------|
| 1                 | 1.5 | 3.0 | 2.0 | DCE     | nd <sup>[c]</sup>        |
| 2                 | 1.5 | 3.0 | 2.0 | toluene | nd <sup>[c]</sup>        |
| 3                 | 1.5 | 3.0 | 2.0 | TFE     | 36                       |
| 4                 | 1.5 | 2.0 | 2.0 | HFIP    | 63                       |
| 5 <sup>[d]</sup>  | 1.5 | 2.0 | 2.0 | HFIP    | 66                       |
| 6 <sup>[e]</sup>  | 1.5 | 3.0 | 1.0 | HFIP    | 70                       |
| 7 <sup>[e]</sup>  | 2.0 | 3.0 | 1.0 | HFIP    | 85                       |
| 8 <sup>[e]</sup>  | 3.0 | 3.0 | 1.0 | HFIP    | 84                       |
| 9 <sup>[e]</sup>  | 2.0 | 2.0 | 1.0 | HFIP    | 88                       |
| 10 <sup>[f]</sup> | 1.5 | 3.0 | 2.0 | HFIP    | 16                       |
| 11 <sup>[g]</sup> | 1.5 | 3.0 | 2.0 | HFIP    | 33                       |
| 12 <sup>[h]</sup> | 1.5 | 3.0 | 2.0 | HFIP    | 51                       |

[a] The reaction was performed on a 0.1 mmol scale. [b] Determined by <sup>19</sup>F NMR using 1,4-bis(trifluoromethyl)benzene as the internal standard. [c] Not detected. [d] Performed at 0.1 M. [e] Performed at 0.2 M. [f] 2 equiv of MeCN was used. [g] 5 equiv of MeCN was used. [h] 10 equiv of MeCN was used.

## General Procedures and Product Characterization

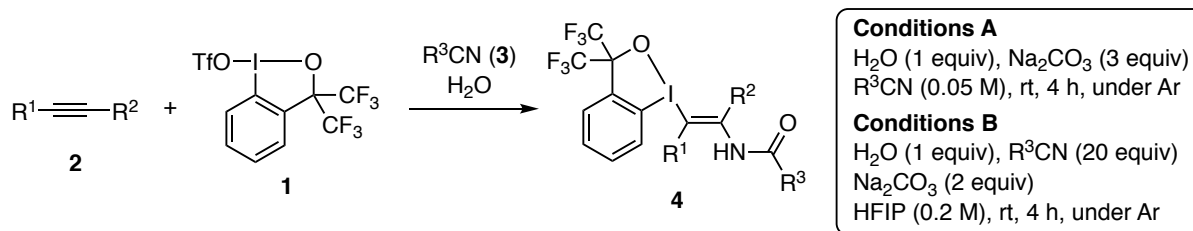

**General Procedure A:** In an argon-filled glove box, an 8-mL vial equipped with a magnetic stir bar was charged sequentially with Na<sub>2</sub>CO<sub>3</sub> (63.6 mg, 0.60 mmol), nitrile (4 mL), alkyne (0.20 mmol), and H<sub>2</sub>O (3.6 mg, 0.20 mmol), followed by the addition of BXT (207 mg, 0.40 mmol). The vial was closed and taken out of the glove box. The resulting mixture was vigorously stirred (1500 rpm) at room temperature for 4 h. H<sub>2</sub>O (10 mL) was added, and then the mixture was extracted with EtOAc (10 mL x 3). The combined organic layer was washed with H<sub>2</sub>O (10 mL) and brine (10 mL), dried over MgSO<sub>4</sub>, and concentrated under reduced pressure. The residue was purified by flash chromatography on silica gel to afford the desired product.

**General Procedure B:** In an argon-filled glove box, a 4-mL vial equipped with a magnetic stir bar was charged sequentially with Na<sub>2</sub>CO<sub>3</sub> (42.4 mg, 0.40 mmol), hexafluoroisopropanol (HFIP, 1 mL), nitrile (4 mmol), alkyne (0.20 mmol), and H<sub>2</sub>O (3.6 mg, 0.20 mmol), followed by the addition of BXT (207 mg, 0.40 mmol). The vial was closed and taken out of the glove box. The resulting mixture was vigorously stirred (1500 rpm) at room temperature for 4 h. H<sub>2</sub>O (10 mL) was added, and then the mixture was extracted with EtOAc (10 mL x 3). The combined organic layer was washed with H<sub>2</sub>O (10 mL) and brine (10 mL), dried over MgSO<sub>4</sub>, and concentrated under reduced pressure. The residue was purified by flash chromatography on silica gel to afford the desired product.

*Note: The yield of the reaction would be affected by the rate of stirring; Slow or inefficient stirring would lead to lower yields. In the above procedure, once all the reagents and solvents have been introduced into the vial in the glove box, it should be transferred to the stirrer outside the glovebox as quickly as possible.*

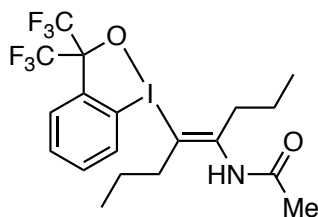

**(E)-N-(5-(3,3-Bis(trifluoromethyl)-1 $\lambda^3$ -benzo[d][1,2]iodaoxol-1(3H)-yl)oct-4-en-4**

**yl)acetamide (4aa):** Synthesized by the general procedure A in 85% yield (91.3 mg) or by the general procedure B in 87% yield (93.5 mg); White solid;  $R_f$  0.3 (Et<sub>2</sub>O/EtOAc = 2/1); m.p. 162-164 °C; <sup>1</sup>H NMR (400 MHz, CD<sub>3</sub>OD)  $\delta$  8.12 (dd,  $J$  = 8.0, 1.2 Hz, 1H), 7.82 (d,  $J$  = 7.2 Hz, 1H), 7.68-7.60 (m, 2H), 2.66 (brs, 2H), 2.45 (brs, 2H), 2.13 (s, 3H), 1.73-1.49 (brs, 2H), 1.49-1.32 (brs, 2H), 0.93 (t,  $J$  = 7.2 Hz, 3H), 0.83 (t,  $J$  = 7.3 Hz, 3H). The signal of the amide proton was merged with that of the methanol proton at 4.86 ppm. All the  $\beta$ -iodanyl enamides reported here displayed the same behavior in CD<sub>3</sub>OD; <sup>13</sup>C NMR (100 MHz, CD<sub>3</sub>OD)  $\delta$  171.8, 148.4, 133.6, 133.5, 131.5, 131.3, 130.7, 125.6 (q, <sup>1</sup> $J_{C-F}$  = 289.7 Hz), 122.5, 110.9, 83.1-81.9 (m), 41.1, 39.3, 23.5, 22.8, 21.8, 14.0, 13.9; <sup>19</sup>F NMR (376 MHz, CD<sub>3</sub>OD)  $\delta$  -77.2; HRMS (ESI) Calcd for C<sub>19</sub>H<sub>23</sub>F<sub>6</sub>INO<sub>2</sub> [M + H]<sup>+</sup> 538.0678, found 538.0670. Recrystallization from hexane/ethyl acetate afforded single crystals suitable for X-ray diffraction analysis, which unambiguously confirmed the molecular structure of **4aa** (Figure S2 and Table S3).<sup>6</sup>

**Procedure for a 2-mmol scale reaction:** In an argon-filled glove box, a 100-mL Schlenk tube equipped with a magnetic stir bar was charged sequentially with Na<sub>2</sub>CO<sub>3</sub> (636 mg, 6.0 mmol), MeCN (40 mL), 4-octyne (220 mg, 2.0 mmol), and H<sub>2</sub>O (36 mg, 2.0 mmol), followed by the addition of BXT (2.07 g, 4.0 mmol). The vial was closed and taken out of the glove box. The resulting mixture was vigorously stirred (1500 rpm) at room temperature for 8 h. H<sub>2</sub>O (10 mL) was added, and then the mixture was extracted with EtOAc (100 mL x 3). The combined organic layer was washed with H<sub>2</sub>O (100 mL) and brine (100 mL), dried over MgSO<sub>4</sub>, and concentrated under reduced pressure. The residue was purified by flash chromatography on silica gel to afford the desired product (white solid, 0.77 g, 72%).

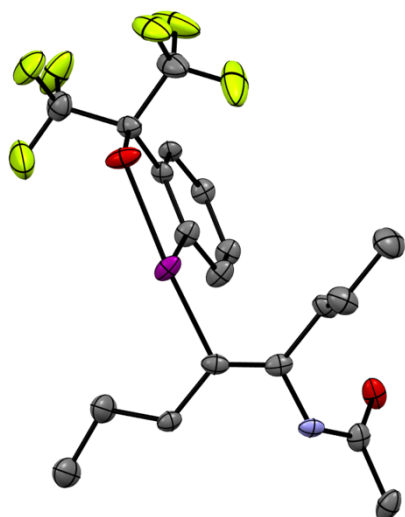

**Figure S2.** ORTEP drawing of **4aa** (thermal ellipsoids shown at 50% probability level).



**Table S3.** Crystal data and structure refinement for **4aa**

|                                     |                                                                                           |                           |
|-------------------------------------|-------------------------------------------------------------------------------------------|---------------------------|
| Identification code                 | ito117m                                                                                   |                           |
| Chemical formula                    | C <sub>19</sub> H <sub>22</sub> F <sub>6</sub> INO <sub>2</sub>                           |                           |
| Formula weight                      | 537.27 g/mol                                                                              |                           |
| Temperature                         | 100(2) K                                                                                  |                           |
| Wavelength                          | 0.71073 Å                                                                                 |                           |
| Crystal size                        | 0.010 x 0.100 x 0.220 mm                                                                  |                           |
| Crystal habit                       | colorless plate                                                                           |                           |
| Crystal system                      | monoclinic                                                                                |                           |
| Space group                         | P 1 21/c 1                                                                                |                           |
| Unit cell dimensions                | a = 10.9318(5) Å                                                                          | α = 90°                   |
|                                     | b = 28.7192(12) Å                                                                         | β = 92.8262 (19)°         |
|                                     | c = 13.4936(5) Å                                                                          | γ = 90°                   |
| Volume                              | 4231.2(3) Å <sup>3</sup>                                                                  |                           |
| Z                                   | 8                                                                                         |                           |
| Density (calculated)                | 1.687 g/cm <sup>3</sup>                                                                   |                           |
| Absorption coefficient              | 1.580 mm <sup>-1</sup>                                                                    |                           |
| F (000)                             | 2128                                                                                      |                           |
| Theta range for data collection     | 2.00 to 28.74°                                                                            |                           |
| Index ranges                        | -14 ≤ h ≤ 14, -38 ≤ k ≤ 38, -14 ≤ l ≤ 18                                                  |                           |
| Reflections collected               | 40809                                                                                     |                           |
| Independent reflections             | 10915 [R(int) = 0.1026]                                                                   |                           |
| Coverage of independent reflections | 99.5%                                                                                     |                           |
| Max. and min. transmission          | 0.9840 and 0.7230                                                                         |                           |
| Structure solution program          | XT, VERSION 2018/2                                                                        |                           |
| Refinement method                   | Full-matrix least-squares on F <sup>2</sup>                                               |                           |
| Refinement program                  | SHELXL-2018/3 (Sheldrick, 2018)                                                           |                           |
| Function minimized                  | Σ w(F <sub>o</sub> <sup>2</sup> - F <sub>c</sub> <sup>2</sup> ) <sup>2</sup>              |                           |
| Data / restraints / parameters      | 10915 / 2145 / 881                                                                        |                           |
| Goodness-of-fit on F <sup>2</sup>   | 1.077                                                                                     |                           |
| Final R indices                     | 7437 data; I > 2σ(I)                                                                      | R1 = 0.0669, wR2 = 0.1307 |
|                                     | all data                                                                                  | R1 = 0.1108, wR2 = 0.1466 |
| Weighting scheme                    | w = 1/[σ <sup>2</sup> (F <sub>o</sub> <sup>2</sup> ) + (0.0398P) <sup>2</sup> + 15.6109P] |                           |
| Largest diff. peak and hole         | 1.814 and -1.904 eÅ <sup>-3</sup>                                                         |                           |
| R.M.S. deviation from mean          | 0.168 eÅ <sup>-3</sup>                                                                    |                           |

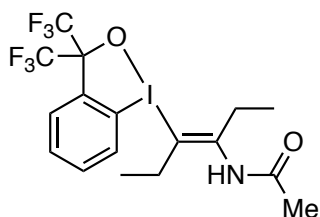

**(E)-N-(4-(3,3-Bis(trifluoromethyl)-1λ<sup>3</sup>-benzo[d][1,2]iodaoxol-1(3H)-yl)hex-3-en-3-yl)**

**acetamide (4ba):** Synthesized by the general procedure A in 81% yield (82.5 mg) or by the general procedure B in 88% yield (89.6 mg); White solid;  $R_f$  0.2 (Et<sub>2</sub>O/EtOAc = 2/1); m.p. 185-187 °C; <sup>1</sup>H NMR (400 MHz, CD<sub>3</sub>OD) δ 8.12 (dd,  $J$  = 8.0, 0.8 Hz, 1H), 7.82 (d,  $J$  = 7.2 Hz, 1H), 7.67-7.59 (m, 2H), 3.00-2.25 (brs, 4H), 2.14 (s, 3H), 1.07 (t,  $J$  = 7.4 Hz, 3H), 0.97 (t,  $J$  = 7.4 Hz, 3H); <sup>13</sup>C NMR (100 MHz, CD<sub>3</sub>OD) δ 172.1, 148.8, 133.7, 133.5, 131.5, 131.3, 130.7, 125.6 (q, <sup>1</sup> $J_{C-F}$  = 288.7 Hz), 123.7, 110.8, 83.1-82.0 (m), 32.7, 30.5, 22.7, 13.9, 12.0; <sup>19</sup>F NMR (376 MHz, CD<sub>3</sub>OD) δ -77.3; HRMS (ESI) Calcd for C<sub>17</sub>H<sub>19</sub>F<sub>6</sub>INO<sub>2</sub> [M + H]<sup>+</sup> 510.0365, found 510.0366.

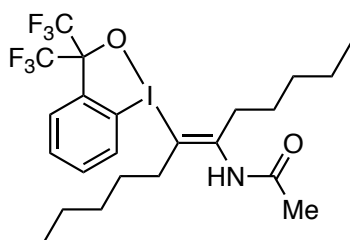

**(E)-N-(7-(3,3-Bis(trifluoromethyl)-1λ<sup>3</sup>-benzo[d][1,2]iodaoxol-1(3H)-yl)dodec-6-en-6-yl)**

**acetamide (4ca):** Synthesized by the general procedure A in 80% yield (94.9 mg) or by the general procedure B in 83% yield (98.5 mg); White solid;  $R_f$  0.3 (Et<sub>2</sub>O/EtOAc = 3/1); m.p. 141-143 °C; <sup>1</sup>H NMR (400 MHz, CD<sub>3</sub>OD) δ 8.14-8.11 (m, 1H), 7.82 (d,  $J$  = 7.0 Hz, 1H), 7.68-7.60 (m, 2H), 2.72 (brs, 2H), 2.44 (brs, 2H), 2.13 (s, 3H), 1.65-1.44 (brs, 2H), 1.44-1.34 (brs, 2H), 1.29-1.30 (m, 4H), 1.20-1.16 (m, 4H), 0.86 (t,  $J$  = 6.7 Hz, 3H), 0.71 (t,  $J$  = 6.9 Hz, 3H); <sup>13</sup>C NMR (100 MHz, CD<sub>3</sub>OD) δ 171.8, 148.4, 133.6, 133.5, 131.5, 131.3, 130.8, 125.6 (q, <sup>1</sup> $J_{C-F}$  = 289.3 Hz), 122.5, 111.0, 83.1-82.0 (m), 39.1, 37.1, 32.3, 32.2, 29.7, 28.0, 23.3, 23.2, 22.8, 14.2, 14.0; <sup>19</sup>F NMR (376 MHz, CD<sub>3</sub>OD) δ -73.2; HRMS (ESI) Calcd for C<sub>23</sub>H<sub>31</sub>F<sub>6</sub>INO<sub>2</sub> [M + H]<sup>+</sup> 594.1304, found 594.1306.

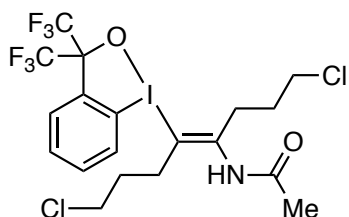

**(E)-N-(5-(3,3-Bis(trifluoromethyl)-1 $\lambda^3$ -benzo[d][1,2]iodaoxol-1(3H)-yl)-1,8-dichlorooct-4-en-4-yl)acetamide (4da):** Synthesized by the general procedure A in 42% yield (50.9 mg) or by the general procedure B in 75% yield (90.9 mg); Light brown solid;  $R_f$  0.4 (Et<sub>2</sub>O/EtOAc = 2/1); m.p. 141-143 °C; <sup>1</sup>H NMR (400 MHz, CD<sub>3</sub>OD)  $\delta$  8.08 (dd,  $J$  = 8.0, 1.6 Hz, 1H), 7.83 (d,  $J$  = 7.0 Hz, 1H), 7.69-7.63 (m, 2H), 3.59-3.56 (m, 2H), 3.52-3.38 (brs, 2H), 3.14-3.87 (brs, 2H), 2.76-2.60 (brs, 1H), 2.60-2.45 (brs, 1H), 2.14 (s, 3H), 2.03-1.92 (brs, 2H), 1.90-1.78 (brs, 2H); <sup>13</sup>C NMR (100 MHz, CD<sub>3</sub>OD)  $\delta$  172.1, 147.9, 133.7, 133.6, 131.6, 131.5, 130.4, 125.5 (q, <sup>1</sup> $J_{C-F}$  = 289.5 Hz), 122.2, 111.1, 83.1-82.0 (m), 44.8, 44.7, 36.4, 34.6, 32.6, 31.2, 22.8; <sup>19</sup>F NMR (376 MHz, CD<sub>3</sub>OD)  $\delta$  -77.2 (d,  $J$  = 52.7 Hz); HRMS (ESI) Calcd for C<sub>19</sub>H<sub>21</sub>Cl<sub>2</sub>F<sub>6</sub>INO<sub>2</sub> [M + H]<sup>+</sup> 605.9898, found 605.9896.

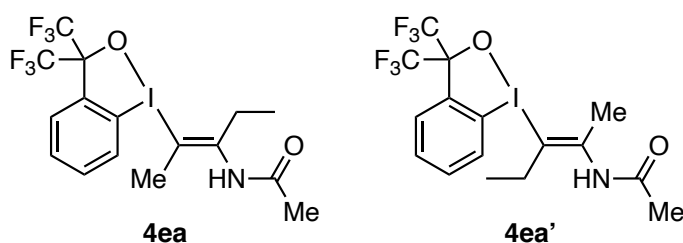

**(E)-N-(2-(3,3-Bis(trifluoromethyl)-1 $\lambda^3$ -benzo[d][1,2]iodaoxol-1(3H)-yl)pent-2-en-3-yl)acetamide (4ea):** Synthesized as a mixture with the minor regioisomer (4ea') by the general procedure A in 74% yield (73.4 mg, regioisomer ratio = 2.4:1) or by the general procedure B in 83% yield (82.3 mg, regioisomer ratio = 2:1); Light brown solid;  $R_f$  0.3 (Et<sub>2</sub>O/EtOAc = 2/1); m.p. 169-170 °C; <sup>1</sup>H NMR (400 MHz, CD<sub>3</sub>OD)  $\delta$  8.11 (dd,  $J$  = 8.0, 1.2 Hz, 1H, major), 8.01 (dd,  $J$  = 8.0, 1.2 Hz, 0.5H, minor), 7.83 (app. d,  $J$  = 6.9 Hz, 1H + 0.5H, major + minor), 7.68-7.59 (m, 2H + 1H, major + minor), 2.80-2.47 (brs, 2H + 1H, major + minor), 2.39 (s, 3H, major), 2.27 (s, 1.5H, minor), 2.14 (s, 3H, major), 2.12 (s, 1.5H, minor), 1.08 (t,  $J$  = 7.4 Hz, 1.5H, minor), 0.96 (t,  $J$  = 7.3 Hz, 3H, major); <sup>13</sup>C NMR (100 MHz, CD<sub>3</sub>OD)  $\delta$  171.9, 171.6,

149.0, 144.6, 133.7 (two signals overlapped), 133.6, 133.5, 131.5 (two signals overlapped), 131.41, 131.38, 130.4, 130.1, 125.5 (q,  $^1J_{C-F} = 289.5$  Hz), 123.5, 113.6, 110.4, 110.0, 83.1-82.0 (m), 32.4, 30.4, 24.84, 24.75, 22.83, 22.76, 13.9, 12.1;  $^{19}\text{F}$  NMR (376 MHz,  $\text{CD}_3\text{OD}$ )  $\delta$  -77.3; HRMS (ESI) Calcd for  $\text{C}_{16}\text{H}_{17}\text{F}_6\text{INO}_2$   $[\text{M} + \text{H}]^+$  496.0208, found 496.0208. The regiochemistry of the major isomer (**4ea**) was assumed from that of the related compounds **4fa**, **4ga**, and **4ia** (vide infra).

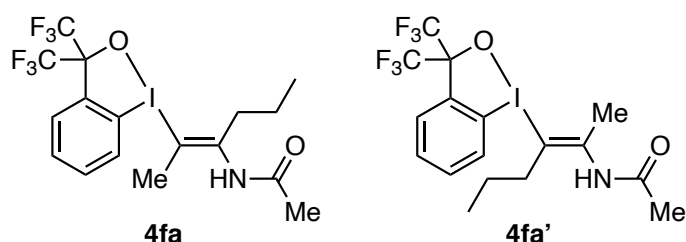

**(E)-N-(2-(3,3-Bis(trifluoromethyl)-1 $\lambda^3$ -benzo[d][1,2]iodaoxol-1(3H)-yl)hex-2-en-3-yl)**

**acetamide (4fa):** Synthesized as a mixture with the minor regioisomer (**4fa'**) by the general procedure A in 71% yield (72.3 mg, regioisomer ratio = 2:1) or by the general procedure B in 78% yield (79.6 mg, regioisomer ratio = 2:1); White solid;  $R_f$  0.2 ( $\text{Et}_2\text{O}/\text{EtOAc} = 2/1$ ); m.p. 154-156 °C;  $^1\text{H}$  NMR (400 MHz,  $\text{CD}_3\text{OD}$ , two isomers)  $\delta$  8.09 (dd,  $J = 7.8, 1.0$  Hz, 1H, major), 8.01 (dd,  $J = 7.8, 1.0$  Hz, 0.5H, minor), 7.82 (app. d,  $J = 6.1$  Hz, 1H + 0.5H, major + minor), 7.68-7.60 (m, 2H + 1H, major + minor), 2.80-2.45 (brs, 2H + 1H, major + minor), 2.40 (s, 3H, major), 2.27 (s, 1.5H, minor), 2.13 (s, 3H, major), 2.12 (s, 1.6H, minor), 1.61-1.47 (brs, 1.0H, minor), 1.37-1.46 (m, 2H, major), 0.94 (t,  $J = 7.4$  Hz, 1.5H, minor), 0.82 (t,  $J = 7.3$  Hz, 3H, major);  $^{13}\text{C}$  NMR (100 MHz,  $\text{CD}_3\text{OD}$ )  $\delta$  171.9, 171.3, 148.0, 145.2, 133.7 (two signals overlapped), 133.6, 133.5, 131.5 (two signals overlapped), 131.34, 131.31, 130.5, 130.1, 125.6 (q,  $^1J_{C-F} = 289.3$  Hz), 121.7, 114.1, 110.6, 110.0, 83.1-82.0 (m), 40.9, 39.1, 24.92, 24.87, 23.4, 22.83, 22.81, 22.0, 14.00, 13.95;  $^{19}\text{F}$  NMR (376 MHz,  $\text{CD}_3\text{OD}$ )  $\delta$  -77.3; HRMS (ESI) Calcd for  $\text{C}_{17}\text{H}_{19}\text{F}_6\text{INO}_2$   $[\text{M} + \text{H}]^+$  510.0365, found 510.0368. The regiochemistry of the major isomer (**4fa**) was assigned by the NOESY spectrum that displayed a correlation between the allylic methyl protons and the *ortho* aryl proton of the BX group (see the attached spectrum).

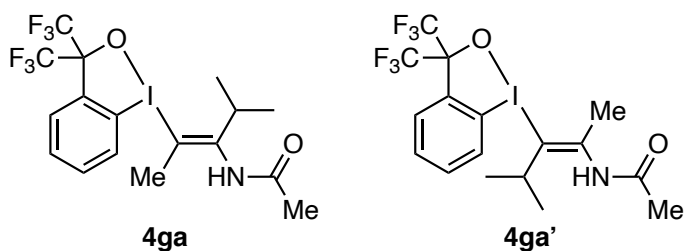

**(*E*)-*N*-(2-(3,3-Bis(trifluoromethyl)-1 $\lambda^3$ -benzo[*d*][1,2]iodaoxol-1(3*H*)-yl)-4-methylpent-2-en-3-yl)acetamide (4ga):** Synthesized as a mixture with the minor regioisomer (4ga') by the general procedure A in 73% yield (74.3 mg, regioisomer ratio = 3.4:1) or by the general procedure B in 82% yield (83.5 mg, regioisomer ratio = 2.5:1); White solid;  $R_f$  0.3 (Et<sub>2</sub>O/EtOAc = 2/1); m.p. 157-159 °C; <sup>1</sup>H NMR (400 MHz, CD<sub>3</sub>OD, two isomers)  $\delta$  8.25 (dd,  $J$  = 7.6, 1.6 Hz, 1H, major), 8.09 (dd,  $J$  = 8.0, 1.2 Hz, 0.3H, minor), 7.83 (app. d,  $J$  = 6.3 Hz, 1H+0.3H, major + minor), 7.68-7.59 (m, 2H+0.6H, major + minor), 3.16 (sep,  $J$  = 6.8 Hz, 1H, major), 2.92 (sep,  $J$  = 6.6 Hz, 0.3H, minor), 2.37 (s, 3H, major), 2.25 (s, 0.9H, minor), 2.17 (s, 3H, major), 2.12 (s, 0.9H, minor), 1.09 (d,  $J$  = 6.8 Hz, 0.9H, minor), 1.10-0.95 (m, 6H, major), 0.96 (d,  $J$  = 6.4 Hz, 0.9H); <sup>13</sup>C NMR (100 MHz, CD<sub>3</sub>OD, two isomers)  $\delta$  172.2, 172.0, 150.9, 144.1, 133.7, 133.6, 133.51, 133.47, 132.0, 131.6, 131.5, 131.4, 130.8, 130.0, 125.6 (q, <sup>1</sup> $J_{C-F}$  = 289.5 Hz), 116.3 (two signals overlapped), 110.4, 109.9, 83.1-81.9 (m), 38.4, 34.2, 25.2, 24.7, 23.8, 22.8, 22.4, 21.6, 20.1 (two signals overlapped); <sup>19</sup>F NMR (376 MHz, CD<sub>3</sub>OD)  $\delta$  -77.0 (q,  $J$  = 8.6 Hz, minor), -77.2 (major), -77.4 (q,  $J$  = 8.6 Hz, minor); HRMS (ESI) Calcd for C<sub>17</sub>H<sub>19</sub>F<sub>6</sub>INO<sub>2</sub> [M + H]<sup>+</sup> 510.0365, found 510.0365. The regiochemistry of the major isomer (4ga) was assigned by the NOESY spectrum that displayed a correlation between the allylic methyl protons and the *ortho* aryl proton of the BX group (see the attached spectrum).

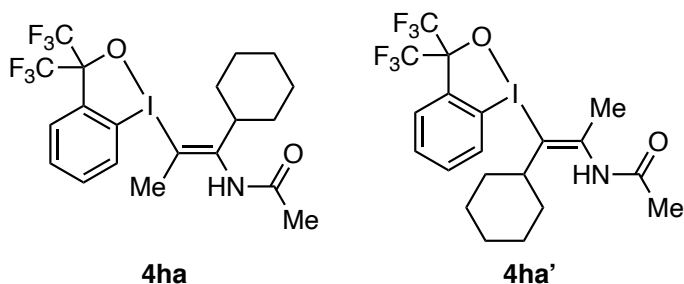

**(*E*)-*N*-(2-(3,3-Bis(trifluoromethyl)-1 $\lambda^3$ -benzo[*d*][1,2]iodaoxol-1(3*H*)-yl)-1-cyclohexylprop-1-en-1-yl)acetamide (4ha):** Synthesized as a mixture with the minor

regioisomer (**4ha'**) by the general procedure A in 74% yield (81.3 mg, regioisomer ratio = 2.2:1) or by the general procedure B in 82% yield (90.1 mg, regioisomer ratio = 1.7:1); White solid;  $R_f$  0.3 (Et<sub>2</sub>O/EtOAc = 2/1); m.p. 138-140 °C; <sup>1</sup>H NMR (400 MHz, CD<sub>3</sub>OD, two isomers)  $\delta$  8.25 (d,  $J$  = 8.0, 1.2 Hz, 1H, major), 8.07 (d,  $J$  = 8.0, 0.8 Hz, 0.6H, minor), 7.82 (app. d,  $J$  = 5.7 Hz, 1H + 0.6H, major + minor), 7.67-7.58 (m, 2H + 1.2H, major + minor), 2.83-2.75 (m, 1H, major), 2.60-2.53 (m, 0.6H, minor), 2.38 (s, 3H, major), 2.24 (s, 1.7H, minor), 2.15 (s, 3H, major), 2.14 (s, 1.8H, minor), 1.80-1.61 (m, 5H + 3.1H, major + minor), 1.45-1.28 (m, 3H + 1.7H, major + minor), 1.19-1.05 (m, 2H + 1.2H, major + minor); <sup>13</sup>C NMR (100 MHz, CD<sub>3</sub>OD, two isomers)  $\delta$  172.2, 171.7, 150.3, 144.4, 133.7, 133.6, 133.5, 131.6, 131.5, 131.4, 131.3, 130.9, 130.2, 130.1, 125.6 (q, <sup>1</sup> $J_{C-F}$  = 289.3 Hz), 116.9 (two signals overlapped), 110.9, 110.1, 83.1-82.0 (m), 44.2, 34.5, 32.5, 31.0, 27.0, 26.8, 26.7, 26.6, 25.2, 24.6, 22.8, 22.4; <sup>19</sup>F NMR (376 MHz, CD<sub>3</sub>OD)  $\delta$  -77.0 (q,  $J$  = 8.6 Hz, minor), -77.2 (major), -77.3 (q,  $J$  = 8.6 Hz, minor); HRMS (ESI) Calcd for C<sub>20</sub>H<sub>23</sub>F<sub>6</sub>INO<sub>2</sub> [M + H]<sup>+</sup> 550.0678, found 550.0673. The regiochemistry of the major isomer (**4ha**) was assumed from that of the related compounds **4fa**, **4ga**, and **4ia**.

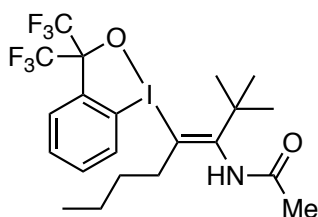

**(E)-N-(4-(3,3-Bis(trifluoromethyl)-1 $\lambda^3$ -benzo[d][1,2]iodaoxol-1(3H)-yl)-2,2-dimethyloct-3-en-3-yl)acetamide (**4ia**):** Synthesized by the general procedure B in 44% yield (49.7 mg); White solid;  $R_f$  0.4 (Et<sub>2</sub>O/EtOAc = 3/1); m.p. 157-159 °C; <sup>1</sup>H NMR (400 MHz, CD<sub>3</sub>OD)  $\delta$  8.58-7.98 (brs, 1H), 7.82 (app. s, 1H), 7.70-7.66 (m, 2H), 3.12-2.90 (brs, 1H), 2.37-2.19 (brs, 1H), 2.13 (s, 3H), 1.72-1.54 (brs, 1H), 1.53-1.41 (brs, 1H), 1.38-1.32 (m, 2H), 1.30 (s, 9H), 0.91 (t,  $J$  = 7.3 Hz, 3H); <sup>13</sup>C NMR (100 MHz, CD<sub>3</sub>OD)  $\delta$  172.0, 153.8, 133.9, 133.3, 131.6, 131.5, 131.2, 125.6 (q, <sup>1</sup> $J_{C-F}$  = 289.9 Hz), 125.4 (q, <sup>1</sup> $J_{C-F}$  = 288.9 Hz), 123.2, 112.4, 83.0-81.8 (m), 40.9, 40.5, 32.2, 31.0, 23.2, 22.2, 14.1; <sup>19</sup>F NMR (376 MHz, CD<sub>3</sub>OD)  $\delta$  -77.31, -77.33; HRMS (ESI) Calcd for C<sub>21</sub>H<sub>27</sub>F<sub>6</sub>INO<sub>2</sub> [M + H]<sup>+</sup> 566.0991, found 566.0994. Recrystallization

from hexane/ethyl acetate afforded single crystals suitable for X-ray diffraction analysis, which unambiguously confirmed the molecular structure of **4ia** (Figure S3 and Table S4).<sup>6</sup>

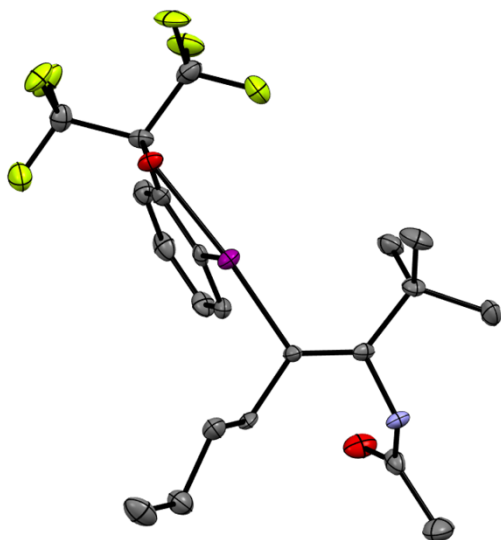

**Figure S3.** ORTEP drawing of **4ia** (thermal ellipsoids shown at 50% probability level).

**Table S4.** Crystal data and structure refinement for **4ia**

|                                     |                                                                                               |
|-------------------------------------|-----------------------------------------------------------------------------------------------|
| Identification code                 | ito123m                                                                                       |
| Chemical formula                    | C <sub>84</sub> H <sub>104</sub> F <sub>24</sub> I <sub>4</sub> N <sub>4</sub> O <sub>8</sub> |
| Formula weight                      | 2261.31 g/mol                                                                                 |
| Temperature                         | 100(2) K                                                                                      |
| Wavelength                          | 0.71073 Å                                                                                     |
| Crystal size                        | 0.020 x 0.040 x 0.180 mm                                                                      |
| Crystal habit                       | colorless needle                                                                              |
| Crystal system                      | monoclinic                                                                                    |
| Space group                         | P 1 21 1                                                                                      |
| Unit cell dimensions                | a = 9.9670(9) Å<br>b = 16.2018(14) Å<br>c = 13.8919(13) Å                                     |
| Volume                              | 2243.3(4) Å <sup>3</sup>                                                                      |
| Z                                   | 1                                                                                             |
| Density (calculated)                | 1.674 g/cm <sup>3</sup>                                                                       |
| Absorption coefficient              | 1.494                                                                                         |
| Theta range for data collection     | 1.93 to 32.11°                                                                                |
| Index ranges                        | -14 ≤ h ≤ 14, -24 ≤ k ≤ 24, -20 ≤ l ≤ 20                                                      |
| Reflections collected               | 51158                                                                                         |
| Independent reflections             | 15649 [R(int) = 0.1105]                                                                       |
| Coverage of independent reflections | 99.9%                                                                                         |
| Absorption correction               | Multi-Scan                                                                                    |
| Max. and min. transmission          | 0.9710 and 0.7750                                                                             |
| Structure solution technique        | direct methods                                                                                |
| Structure solution program          | XT, VERSION 2018/2                                                                            |
| Refinement method                   | Full-matrix least-squares on F <sup>2</sup>                                                   |
| Refinement program                  | SHELXL-2018/3 (Sheldrick, 2018)                                                               |
| Function minimized                  | Σ w(F <sub>o</sub> <sup>2</sup> - F <sub>c</sub> <sup>2</sup> ) <sup>2</sup>                  |
| Data / restraints / parameters      | 15649 / 1 / 570                                                                               |
| Goodness-of-fit on F <sup>2</sup>   | 0.965                                                                                         |
| Δ/σ <sub>max</sub>                  | 0.001                                                                                         |
| Final R indices                     | 9720 data; I > 2σ(I) R1 = 0.0543, wR2 = 0.0728<br>all data R1 = 0.1273, wR2 = 0.0888          |
| Weighting scheme                    | w = 1/[σ <sup>2</sup> (F <sub>o</sub> <sup>2</sup> ) + (0.0152P) <sup>2</sup> ]               |
| Absolute structure parameter        | -0.056(15)                                                                                    |
| Largest diff. peak and hole         | 1.066 and -1.577 eÅ <sup>-3</sup>                                                             |
| R.M.S. deviation from mean          | 0.170 eÅ <sup>-3</sup>                                                                        |



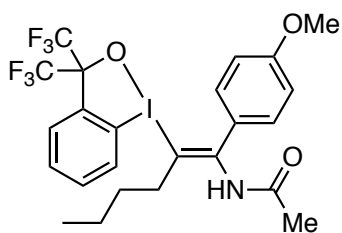

**(E)-N-(2-(3,3-Bis(trifluoromethyl)-1 $\lambda^3$ -benzo[d][1,2]iodaoxol-1(3H)-yl)-1-(4-methoxyphenyl)hex-1-en-1-yl)acetamide (4ja):** Synthesized by the general procedure A in 42% yield (51.7 mg); White solid;  $R_f$  0.3 (Et<sub>2</sub>O/EtOAc = 3/1); m.p. 113-115 °C; <sup>1</sup>H NMR (400 MHz, CD<sub>3</sub>OD)  $\delta$  8.34 (d,  $J$  = 8.0 Hz, 1H), 7.73 (d,  $J$  = 7.1 Hz, 1H), 7.67-7.58 (m, 2H), 7.28-7.24 (m, 2H), 6.88-6.85 (m, 2H), 3.76 (s, 3H), 2.83-2.46 (brs, 2H), 2.14 (s, 3H), 1.66-1.59 (m, 2H), 1.46-1.37 (m, 2H), 0.93 (t,  $J$  = 7.3 Hz, 3H); <sup>13</sup>C NMR (100 MHz, CD<sub>3</sub>OD)  $\delta$  171.5, 162.4, 147.8, 133.4, 132.5, 131.9, 131.2 (two signals overlapped), 130.9, 125.5 (q,  $^1J_{C-F}$  = 289.4 Hz), 123.3, 114.8, 110.8, 82.9-81.8 (m), 55.8, 37.5, 32.6, 23.2, 22.9, 14.1; <sup>19</sup>F NMR (376 MHz, CD<sub>3</sub>OD)  $\delta$  -77.3; HRMS (ESI) Calcd for C<sub>24</sub>H<sub>25</sub>F<sub>6</sub>INO<sub>3</sub> [M + H]<sup>+</sup> 616.0783, found 616.0782.

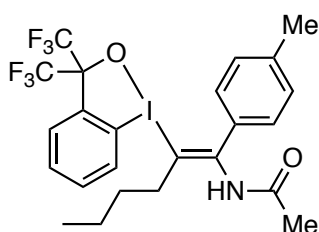

**(E)-N-(2-(3,3-Bis(trifluoromethyl)-1 $\lambda^3$ -benzo[d][1,2]iodaoxol-1(3H)-yl)-1-(p-tolyl)hex-1-en-1-yl)acetamide (4ka):** Synthesized by the general procedure A in 33% yield (39.6 mg); White solid;  $R_f$  0.3 (Et<sub>2</sub>O/EtOAc = 3/1); m.p. 158-159 °C; <sup>1</sup>H NMR (400 MHz, CD<sub>3</sub>OD)  $\delta$  8.33 (d,  $J$  = 8.0 Hz, 1H), 7.73 (d,  $J$  = 7.2 Hz, 1H), 7.67-7.59 (m, 2H), 7.20 (app. d,  $J$  = 8.1 Hz, 2H), 7.14 (app. d,  $J$  = 8.0 Hz, 2H), 2.80-2.50 (brs, 2H), 2.30 (s, 3H), 2.14 (s, 3H), 1.67-1.59 (m, 2H), 1.46-1.37 (m, 2H), 0.93 (t,  $J$  = 7.3 Hz, 3H); <sup>13</sup>C NMR (100 MHz, CD<sub>3</sub>OD)  $\delta$  171.5, 148.0, 141.2, 137.5, 133.5, 133.4, 131.3, 131.2, 130.9, 130.2, 130.0, 125.4 (q,  $^1J_{C-F}$  = 289.0 Hz), 123.9, 110.8, 82.9-81.7 (m), 37.4, 32.5, 23.3, 22.9, 21.3, 14.1; <sup>19</sup>F NMR (376 MHz, CD<sub>3</sub>OD)  $\delta$  -77.3; HRMS (ESI) Calcd for C<sub>24</sub>H<sub>24</sub>F<sub>6</sub>INO<sub>2</sub> [M + H]<sup>+</sup> 600.0834, found 600.0837.

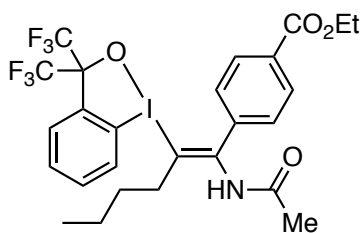

**Ethyl (E)-4-(1-acetamido-2-(3,3-bis(trifluoromethyl)-1 $\lambda^3$ -benzo[d][1,2]iodaoxol-1(3H)-yl)hex-1-en-1-yl)benzoate (4la):** Synthesized by the general procedure B in 51% yield (67.1 mg); White solid;  $R_f$  0.4 (Et<sub>2</sub>O/EtOAc = 3/1); m.p. 166-168 °C; <sup>1</sup>H NMR (400 MHz, CD<sub>3</sub>OD)  $\delta$  8.26 (dd,  $J$  = 8.0, 0.8 Hz, 1H), 7.94 (app. d,  $J$  = 8.4 Hz, 2H), 7.73 (app. d,  $J$  = 7.4 Hz, 1H), 7.70-7.61 (m, 2H), 7.42 (app. d,  $J$  = 8.4 Hz, 2H), 4.33 (q,  $J$  = 7.1 Hz, 2H), 2.98-2.50 (brs, 2H), 2.14 (s, 3H), 1.69-1.61 (m, 2H), 1.49-1.40 (m, 2H), 1.34 (t,  $J$  = 7.1 Hz, 3H), 0.95 (t,  $J$  = 7.3 Hz, 3H); <sup>13</sup>C NMR (100 MHz, CD<sub>3</sub>OD)  $\delta$  171.6, 162.2, 147.7, 144.8, 133.6, 133.4, 132.5, 131.4, 131.3, 130.7, 130.43, 130.41, 125.6, 125.5 (q, <sup>1</sup> $J_{C-F}$  = 289.4 Hz), 110.0, 82.9-81.8 (m), 62.4, 37.3, 32.3, 23.3, 22.9, 14.5, 14.1; <sup>19</sup>F NMR (376 MHz, CD<sub>3</sub>OD)  $\delta$  -77.3; HRMS (ESI) Calcd for C<sub>26</sub>H<sub>27</sub>F<sub>6</sub>INO<sub>4</sub> [M + H]<sup>+</sup> 658.0889, found 658.0894.

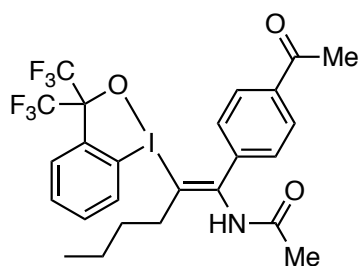

**(E)-N-(1-(4-Acetylphenyl)-2-(3,3-bis(trifluoromethyl)-1 $\lambda^3$ -benzo[d][1,2]iodaoxol-1(3H)-yl)hex-1-en-1-yl)acetamide (4ma):** Synthesized by the general procedure B in 53% yield (65.3 mg); White liquid;  $R_f$  0.2 (Et<sub>2</sub>O/EtOAc = 3/1); <sup>1</sup>H NMR (400 MHz, CD<sub>3</sub>OD)  $\delta$  8.26 (d,  $J$  = 7.9 Hz, 1H), 7.92 (app. d,  $J$  = 8.4 Hz, 2H), 7.73 (app. d,  $J$  = 7.2 Hz, 1H), 7.70-7.61 (m, 2H), 7.45 (app. d,  $J$  = 8.3 Hz, 2H), 2.95-2.58 (brs, 2H), 2.54 (s, 3H), 2.14 (s, 3H), 1.69-1.62 (m, 2H), 1.49-1.40 (m, 2H), 0.95 (t,  $J$  = 7.3 Hz, 3H); <sup>13</sup>C NMR (100 MHz, CD<sub>3</sub>OD)  $\delta$  199.5, 171.7, 146.7, 144.9, 138.8, 133.6, 133.4, 131.4, 131.3, 130.7, 130.6, 129.4, 125.6, 125.5 (q, <sup>1</sup> $J_{C-F}$  = 289.3 Hz), 110.0, 82.9-81.7 (m), 37.3, 32.3, 26.7, 23.3, 22.9, 14.1; <sup>19</sup>F NMR (376 MHz, CD<sub>3</sub>OD)  $\delta$  -77.3; HRMS (ESI) Calcd for C<sub>25</sub>H<sub>25</sub>F<sub>6</sub>INO<sub>3</sub> [M + H]<sup>+</sup> 628.0783, found 628.0777.

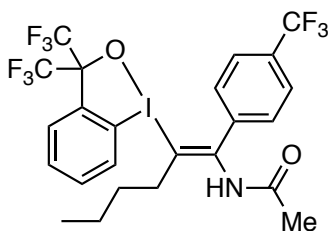

**Ethyl (E)-4-(1-acetamido-2-(3,3-bis(trifluoromethyl)-1 $\lambda^3$ -benzo[d][1,2]iodaoxol-1(3H)-yl)hex-1-en-1-yl)benzoate (4na):** Synthesized by the general procedure B in 51% yield (67.1 mg); White solid;  $R_f$  0.4 (Et<sub>2</sub>O/EtOAc = 3/1); m.p. 157-158 °C; <sup>1</sup>H NMR (400 MHz, CD<sub>3</sub>OD)  $\delta$  8.05-8.02 (m, 1H), 7.94 (app. d,  $J$  = 8.5 Hz, 2H), 7.52 (d,  $J$  = 7.3 Hz, 1H), 7.49-7.40 (m, 2H), 7.39 (app. d,  $J$  = 8.2 Hz, 2H), 7.27 (app. d,  $J$  = 8.1 Hz, 2H), 2.81-2.26 (brs, 2H), 1.93 (s, 3H), 1.49-1.42 (m, 2H), 1.29-1.20 (m, 2H), 0.75 (t,  $J$  = 7.4 Hz, 3H); <sup>13</sup>C NMR (100 MHz, CD<sub>3</sub>OD)  $\delta$  171.7, 146.3, 144.2, 133.7, 133.4, 132.3 (q, <sup>1</sup> $J_{C-F}$  = 32.4 Hz), 131.5, 131.3, 130.9, 130.7, 126.8, 125.3 (q, <sup>1</sup> $J_{C-F}$  = 289.4 Hz), 126.3 (q, <sup>3</sup> $J_{C-F}$  = 3.8 Hz), 125.9, 111.1, 82.9-81.8 (m), 37.3, 32.3, 23.3, 22.8, 14.1; <sup>19</sup>F NMR (376 MHz, CD<sub>3</sub>OD)  $\delta$  -64.4, -77.4; HRMS (ESI) Calcd for C<sub>24</sub>H<sub>22</sub>F<sub>9</sub>INO<sub>2</sub> [M + H]<sup>+</sup> 654.0552, found 654.0554.

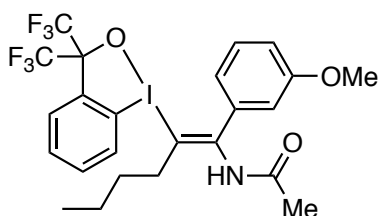

**(E)-N-(2-(3,3-Bis(trifluoromethyl)-1 $\lambda^3$ -benzo[d][1,2]iodaoxol-1(3H)-yl)-1-(3-methoxyphenyl)hex-1-en-1-yl)acetamide (4oa):** Synthesized by the general procedure A in 39% yield (50.0 mg); White solid;  $R_f$  0.3 (Et<sub>2</sub>O/EtOAc = 3/1); m.p. 124-125 °C; <sup>1</sup>H NMR (400 MHz, CD<sub>3</sub>OD)  $\delta$  8.32 (d,  $J$  = 8.0 Hz, 1H), 7.74 (d,  $J$  = 7.2 Hz, 1H), 7.70-7.62 (m, 2H), 7.22 (d,  $J$  = 8.0 Hz, 1H), 6.91-6.82 (m, 3H), 3.63 (s, 3H), 2.85-2.53 (brs, 2H), 2.13 (s, 3H), 1.68-1.60 (m, 2H), 1.47-1.38 (m, 2H), 0.94 (t,  $J$  = 7.3 Hz, 3H); <sup>13</sup>C NMR (100 MHz, CD<sub>3</sub>OD)  $\delta$  171.6, 161.0, 147.6, 141.7, 133.6, 133.4, 131.3, 131.2, 130.9, 130.7, 125.5 (q, <sup>1</sup> $J_{C-F}$  = 289.4 Hz), 124.6, 122.2, 116.5, 115.5, 111.3, 82.9-81.8 (m), 55.7, 37.4, 32.4, 23.3, 22.9, 14.1; <sup>19</sup>F NMR (376

MHz, CD<sub>3</sub>OD)  $\delta$  -77.3; HRMS (ESI) Calcd for C<sub>24</sub>H<sub>25</sub>F<sub>6</sub>INO<sub>3</sub> [M + H]<sup>+</sup> 616.0783, found 616.0785.

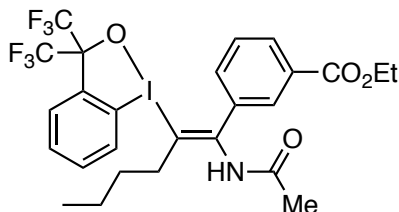

**Ethyl (E)-4-(1-acetamido-2-(3,3-bis(trifluoromethyl)-1 $\lambda$ <sup>3</sup>-benzo[d][1,2]iodaoxol-1(3H)-yl)hex-1-en-1-yl)benzoate (4pa):** Synthesized by the general procedure B in 42% yield (67.1 mg); White solid;  $R_f$  0.2 (Et<sub>2</sub>O/EtOAc = 3/1); m.p. 163-164 °C; <sup>1</sup>H NMR (400 MHz, CD<sub>3</sub>OD)  $\delta$  8.25 (d,  $J$  = 8.0 Hz, 1H), 7.97 (d,  $J$  = 7.8 Hz, 2H), 7.92 (app. s, 1H), 7.75-7.63 (m, 3H), 7.52 (d,  $J$  = 7.8 Hz, 1H), 7.43 (t,  $J$  = 15.4 Hz, 1H), 4.26 (q,  $J$  = 7.1 Hz, 2H), 2.99-2.53 (brs, 2H), 2.14 (s, 3H), 1.70-1.63 (m, 2H), 1.50-1.40 (m, 2H), 1.27 (t,  $J$  = 7.1 Hz, 3H), 0.96 (t,  $J$  = 7.3 Hz, 3H); <sup>13</sup>C NMR (100 MHz, CD<sub>3</sub>OD)  $\delta$  171.8, 167.1, 146.7, 141.0, 134.4, 133.7, 133.4, 131.7, 131.5, 131.3 (two signals overlapped), 130.9, 130.8, 129.7, 125.6, 125.4 (q, <sup>1</sup> $J_{C-F}$  = 289.4 Hz), 111.3, 82.9-81.7 (m), 62.3, 37.3, 32.2, 23.4, 22.9, 14.5, 14.1; <sup>19</sup>F NMR (376 MHz, CD<sub>3</sub>OD)  $\delta$  -77.4; HRMS (ESI) Calcd for C<sub>26</sub>H<sub>27</sub>F<sub>6</sub>INO<sub>4</sub> [M + H]<sup>+</sup> 658.0889, found 658.0881.

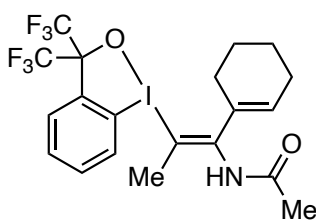

**(E)-N-(2-(3,3-Bis(trifluoromethyl)-1 $\lambda$ <sup>3</sup>-benzo[d][1,2]iodaoxol-1(3H)-yl)-1-(cyclohex-1-en-1-yl)prop-1-en-1-yl)acetamide (4qa):** Synthesized by the general procedure A in 65% yield (71.1 mg); Light brown solid;  $R_f$  0.3 (Et<sub>2</sub>O/EtOAc = 2/1); m.p. 99-101 °C; <sup>1</sup>H NMR (400 MHz, CD<sub>3</sub>OD)  $\delta$  8.20-8.18 (m, 1H), 7.79 (d,  $J$  = 4.0 Hz, 1H), 7.67-7.61 (m, 2H), 5.82-5.84 (m, 1H), 2.42 (s, 3H), 2.12 (s, 3H), 2.06 (brs, 2H), 1.93 (brs, 2H), 1.57-1.53 (m, 4H); <sup>13</sup>C NMR (100 MHz, CD<sub>3</sub>OD)  $\delta$  171.3, 150.0, 138.5, 133.6, 133.4 (two signals overlapped), 131.3, 131.2,

130.6, 125.6 (q,  $^1J_{C-F} = 289.3$  Hz), 113.6, 111.7, 83.1-82.0 (m), 27.6, 25.9, 24.6, 23.2, 22.8, 22.6;  $^{19}\text{F}$  NMR (376 MHz,  $\text{CD}_3\text{OD}$ )  $\delta$  -77.3; HRMS (ESI) Calcd for  $\text{C}_{20}\text{H}_{21}\text{F}_6\text{INO}_2$   $[\text{M} + \text{H}]^+$  548.0521, found 548.0518.

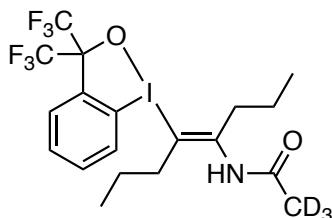

**(E)-N-(5-(3,3-Bis(trifluoromethyl)-1 $\lambda^3$ -benzo[d][1,2]iodaoxol-1(3H)-yl)oct-4-en-4-yl)acetamide-2,2,2- $d_3$  ([D $_3$ ]-4aa):** Synthesized by the general procedure B in 67% yield (72.4 mg); White solid;  $R_f$  0.4 ( $\text{Et}_2\text{O}/\text{EtOAc} = 2/1$ ); m.p. 149-150  $^\circ\text{C}$ ;  $^1\text{H}$  NMR (400 MHz,  $\text{CD}_3\text{OD}$ )  $\delta$  8.13-8.11 (m, 1H), 7.82 (app. d,  $J = 7.2$  Hz, 1H), 7.68-7.60 (m, 2H), 2.89-2.55 (brs, 2H), 2.55-2.22 (brs, 2H), 1.72-1.48 (brs, 2H), 1.48-1.25 (brs, 2H), 0.93 (t,  $J = 7.2$  Hz, 3H), 0.84 (t,  $J = 7.4$  Hz, 3H);  $^{13}\text{C}$  NMR (100 MHz,  $\text{CD}_3\text{OD}$ )  $\delta$  171.9, 148.4, 133.6, 133.5, 131.5, 131.3, 130.7, 125.6 (q,  $^1J_{C-F} = 289.3$  Hz), 122.5, 110.9, 83.1-82.0 (m), 41.1, 39.3, 23.5, 22.3-21.7 (m), 21.8, 14.0, 13.9;  $^{19}\text{F}$  NMR (376 MHz,  $\text{CD}_3\text{OD}$ )  $\delta$  -77.3; HRMS (ESI) Calcd for  $\text{C}_{19}\text{H}_{20}\text{D}_3\text{F}_6\text{INO}_2$   $[\text{M} + \text{H}]^+$  541.0866, found 541.0861.

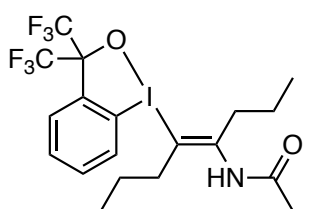

**(E)-N-(5-(3,3-Bis(trifluoromethyl)-1 $\lambda^3$ -benzo[d][1,2]iodaoxol-1(3H)-yl)oct-4-en-4-yl)propionamide (4ab):** Synthesized by the general procedure B in 89% yield (98.1 mg); White solid;  $R_f$  0.4 ( $\text{Et}_2\text{O}/\text{EtOAc} = 2/1$ ); m.p. 147-148  $^\circ\text{C}$ ;  $^1\text{H}$  NMR (400 MHz,  $\text{CD}_3\text{OD}$ )  $\delta$  8.16-8.12 (m, 1H), 7.82 (app. d,  $J = 3.1$  Hz, 1H), 7.68-7.62 (m, 2H), 2.91-2.57 (brs, 2H), 2.56-2.22 (brs, 2H), 2.40 (q,  $J = 7.6$  Hz, 2H), 1.70-1.47 (brs, 2H), 1.47-1.31 (brs, 2H), 1.23 (t,  $J = 7.6$  Hz, 3H), 0.92 (t,  $J = 7.4$  Hz, 3H), 0.83 (t,  $J = 7.4$  Hz, 3H);  $^{13}\text{C}$  NMR (100 MHz,  $\text{CD}_3\text{OD}$ )  $\delta$  175.6, 148.5, 133.62, 133.58, 131.5, 131.3, 130.7, 125.6 (q,  $^1J_{C-F} = 289.5$  Hz), 122.3, 110.9,

83.1-82.0 (m), 41.2, 39.3, 30.3, 23.4, 21.8, 14.0, 13.9, 10.4;  $^{19}\text{F}$  NMR (376 MHz,  $\text{CD}_3\text{OD}$ )  $\delta$  -77.2; HRMS (ESI) Calcd for  $\text{C}_{20}\text{H}_{25}\text{F}_6\text{INO}_2$   $[\text{M} + \text{H}]^+$  552.0834, found 552.0833.

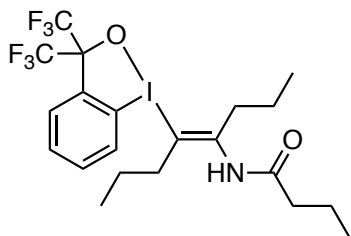

**(E)-N-(5-(3,3-Bis(trifluoromethyl)-1 $\lambda^3$ -benzo[d][1,2]iodaoxol-1(3H)-yl)oct-4-en-4-yl)butyramide (4ac):** Synthesized by the general procedure B in 92% yield (104.1 mg); White solid;  $R_f$  0.4 ( $\text{Et}_2\text{O}/\text{EtOAc} = 2/1$ ); m.p. 143-144 °C;  $^1\text{H}$  NMR (400 MHz,  $\text{CD}_3\text{OD}$ )  $\delta$  8.16-8.12 (m, 1H), 7.82 (app. s, 1H), 7.69-7.62 (m, 2H), 2.91-2.56 (brs, 2H), 2.56-2.22 (brs, 2H), 2.36 (t,  $J = 7.4$  Hz, 2H), 1.79-1.70 (m, 2H), 1.71-1.48 (brs, 2H), 1.48-1.32 (brs, 2H), 1.02 (t,  $J = 7.4$  Hz, 3H), 0.93 (t,  $J = 7.4$  Hz, 3H), 0.83 (t,  $J = 7.4$  Hz, 3H);  $^{13}\text{C}$  NMR (100 MHz,  $\text{CD}_3\text{OD}$ )  $\delta$  174.7, 148.4, 133.63, 133.59, 131.5, 131.3, 130.8, 125.6 (q,  $^1J_{\text{C-F}} = 290.1$  Hz), 122.4, 110.9, 83.1-82.0 (m), 41.2, 39.5, 39.0, 23.5, 20.4, 14.1, 14.0, 13.9;  $^{19}\text{F}$  NMR (376 MHz,  $\text{CD}_3\text{OD}$ )  $\delta$  -77.3; HRMS (ESI) Calcd for  $\text{C}_{21}\text{H}_{27}\text{F}_6\text{INO}_2$   $[\text{M} + \text{H}]^+$  566.0991, found 566.0989.

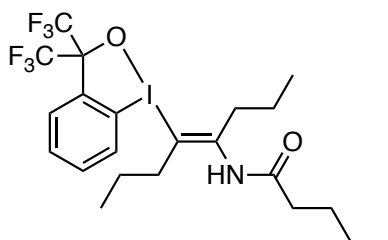

**(E)-N-(5-(3,3-Bis(trifluoromethyl)-1 $\lambda^3$ -benzo[d][1,2]iodaoxol-1(3H)-yl)oct-4-en-4-yl)pentanamide (4ad):** Synthesized by the general procedure B in 83% yield (96.1 mg); White solid;  $R_f$  0.4 ( $\text{Et}_2\text{O}/\text{EtOAc} = 2/1$ ); m.p. 140-141 °C;  $^1\text{H}$  NMR (400 MHz,  $\text{CD}_3\text{OD}$ )  $\delta$  8.16-8.12 (m, 1H), 7.82 (app. d,  $J = 3.9$  Hz, 1H), 7.69-7.62 (m, 2H), 2.91-2.56 (brs, 2H), 2.56-2.23 (brs + t,  $J = 7.5$  Hz, 2H + 2H), 1.73-1.66 (m, 2H), 1.62-1.48 (brs, 2H), 1.48-1.32 (m, 4H), 0.98 (t,  $J = 7.3$  Hz, 3H), 0.92 (t,  $J = 7.3$  Hz, 3H), 0.83 (t,  $J = 7.4$  Hz, 3H);  $^{13}\text{C}$  NMR (100 MHz,  $\text{CD}_3\text{OD}$ )  $\delta$  174.9, 148.4, 133.62, 133.59, 131.5, 131.3, 130.8, 125.6 (q,  $^1J_{\text{C-F}} = 289.4$  Hz), 122.4, 110.9,

83.1-81.9 (m), 41.2, 39.4, 36.8, 29.1, 23.4, 21.8, 14.1, 14.0, 13.9;  $^{19}\text{F}$  NMR (376 MHz,  $\text{CD}_3\text{OD}$ )  $\delta$  -77.2; HRMS (ESI) Calcd for  $\text{C}_{22}\text{H}_{29}\text{F}_6\text{INO}_2$   $[\text{M} + \text{H}]^+$  580.1147, found 580.1146.

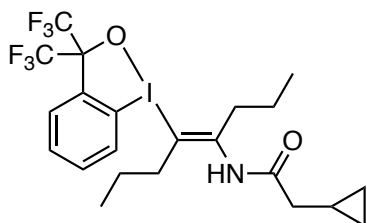

**(E)-N-(5-(3,3-Bis(trifluoromethyl)-1 $\lambda^3$ -benzo[d][1,2]iodaoxol-1(3H)-yl)oct-4-en-4-yl)-2-cyclopropylacetamide (4ae):** Synthesized by the general procedure B in 71% yield (81.9 mg); White solid;  $R_f$  0.3 ( $\text{Et}_2\text{O}/\text{EtOAc} = 2/1$ ); m.p. 152-153  $^\circ\text{C}$ ;  $^1\text{H}$  NMR (400 MHz,  $\text{CD}_3\text{OD}$ )  $\delta$  8.17-8.14 (m, 1H), 7.82 (app. s, 1H), 7.68-7.63 (m, 2H), 2.89-2.58 (brs, 2H), 2.58-2.32 (brs, 2H), 2.26 (d,  $J = 7.2$  Hz, 2H), 1.72-1.49 (brs, 2H), 1.49-1.31 (brs, 2H), 1.21-1.10 (m, 1H), 0.94 (t,  $J = 7.3$  Hz, 3H), 0.84 (t,  $J = 7.4$  Hz, 3H), 0.62-0.58 (m, 2H), 0.29-0.25 (m, 2H);  $^{13}\text{C}$  NMR (100 MHz,  $\text{CD}_3\text{OD}$ )  $\delta$  174.4, 148.4, 133.62, 133.58, 131.5, 131.3, 130.8, 125.6 (q,  $^1J_{\text{C-F}} = 289.6$  Hz), 122.6, 110.9, 83.1-82.0 (m), 42.2, 41.2, 39.4, 23.4, 21.8, 14.1, 14.0, 8.9, 4.9;  $^{19}\text{F}$  NMR (376 MHz,  $\text{CD}_3\text{OD}$ )  $\delta$  -77.2; HRMS (ESI) Calcd for  $\text{C}_{22}\text{H}_{27}\text{F}_6\text{INO}_2$   $[\text{M} + \text{H}]^+$  578.0991, found 578.0984.

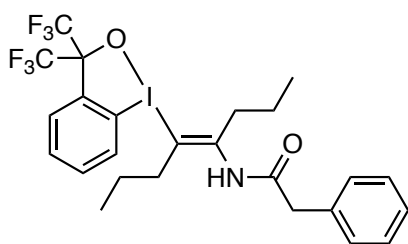

**(E)-N-(5-(3,3-Bis(trifluoromethyl)-1 $\lambda^3$ -benzo[d][1,2]iodaoxol-1(3H)-yl)oct-4-en-4-yl)-2-phenylacetamide (4af):** Synthesized by the general procedure B in 61% yield (74.8 mg); White solid;  $R_f$  0.3 ( $\text{Et}_2\text{O}/\text{EtOAc} = 2/1$ ); m.p. 154-155  $^\circ\text{C}$ ;  $^1\text{H}$  NMR (400 MHz,  $\text{CD}_3\text{OD}$ )  $\delta$  8.11-8.07 (m, 1H), 7.80 (app. s, 1H), 7.65-7.59 (m, 2H), 7.40-7.32 (m, 4H), 7.27 (t,  $J = 7.1$  Hz, 1H), 3.66 (s, 2H), 2.47 (app. t,  $J = 58.7$  Hz, 4H), 1.55-1.22 (brs, 4H), 0.80 (t,  $J = 7.4$  Hz, 3H), 0.77 (t,  $J = 7.3$  Hz, 3H);  $^{13}\text{C}$  NMR (100 MHz,  $\text{CD}_3\text{OD}$ )  $\delta$  172.5, 148.2, 136.5, 133.6, 133.5,

131.5, 131.3, 130.7, 130.1, 129.8, 128.2, 125.6 (q,  $^1J_{C-F} = 289.5$  Hz), 122.8, 110.8, 83.1-82.0 (m), 44.2, 41.1, 39.3, 23.3, 21.7, 14.0, 13.8;  $^{19}\text{F}$  NMR (376 MHz,  $\text{CD}_3\text{OD}$ )  $\delta$  -77.2; HRMS (ESI) Calcd for  $\text{C}_{25}\text{H}_{27}\text{F}_6\text{INO}_2$   $[\text{M} + \text{H}]^+$  614.0991, found 614.0984.

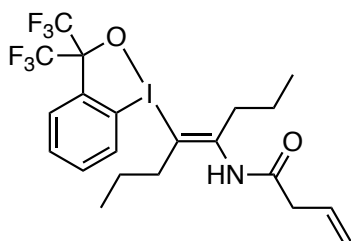

**(E)-N-(5-(3,3-Bis(trifluoromethyl)-1 $\lambda^3$ -benzo[d][1,2]iodaoxol-1(3H)-yl)oct-4-en-4-yl)but-3-enamide (4ag):** Synthesized by the general procedure B in 58% yield (65.3 mg); White solid;  $R_f$  0.3 ( $\text{Et}_2\text{O}/\text{EtOAc} = 2/1$ ); m.p. 137-138 °C;  $^1\text{H}$  NMR (400 MHz,  $\text{CD}_3\text{OD}$ )  $\delta$  8.14-8.11 (m, 1H), 7.82 (app. d,  $J = 6.3$  Hz, 1H), 7.68-7.62 (m, 2H), 6.06-5.96 (m, 1H), 5.28 (dd,  $J = 17.1$ , 1.4 Hz, 1H), 5.22 (dd,  $J = 10.1$ , 1.1 Hz, 1H), 3.16 (d,  $J = 7.0$  Hz, 2H), 2.96-2.55 (brs, 2H), 2.55-2.19 (brs, 2H), 1.71-1.48 (brs, 2H), 1.48-1.30 (brs, 2H), 0.92 (t,  $J = 7.3$  Hz, 3H), 0.83 (t,  $J = 7.3$  Hz, 3H);  $^{13}\text{C}$  NMR (100 MHz,  $\text{CD}_3\text{OD}$ )  $\delta$  172.3, 148.3, 133.61, 133.58, 132.5, 131.5, 131.3, 130.7, 125.6 (q,  $^1J_{C-F} = 289.6$  Hz), 122.7, 119.3, 110.8, 83.1-82.0 (m), 42.1, 41.1, 39.3, 23.4, 21.8, 14.0, 13.9;  $^{19}\text{F}$  NMR (376 MHz,  $\text{CD}_3\text{OD}$ )  $\delta$  -77.2; HRMS (ESI) Calcd for  $\text{C}_{21}\text{H}_{25}\text{F}_6\text{INO}_2$   $[\text{M} + \text{H}]^+$  564.0834, found 564.0828.

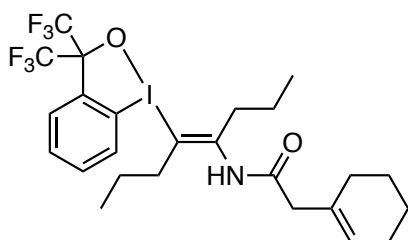

**(E)-N-(5-(3,3-Bis(trifluoromethyl)-1 $\lambda^3$ -benzo[d][1,2]iodaoxol-1(3H)-yl)oct-4-en-4-yl)-2-(cyclohex-1-en-1-yl)acetamide (4ah):** Synthesized by the general procedure B in 66% yield (81.4 mg); White solid;  $R_f$  0.3 ( $\text{Et}_2\text{O}/\text{EtOAc} = 2/1$ ); m.p. 151-152 °C;  $^1\text{H}$  NMR (400 MHz,  $\text{CD}_3\text{OD}$ )  $\delta$  8.15-8.11 (m, 1H), 7.81 (app. s, 1H), 7.68-7.62 (m, 2H), 5.71 (s, 1H), 3.0 (s, 2H), 2.83-2.31 (brs, 4H), 2.08 (app. s, 4H), 1.71-1.66 (m, 2H), 1.63-1.57 (m, 2H), 1.57-1.47 (brs,



2H), 1.42 (app. d,  $J = 5.2$  Hz, 2H), 0.93 (t,  $J = 7.4$  Hz, 3H), 0.83 (t,  $J = 7.4$  Hz, 3H);  $^{13}\text{C}$  NMR (100 MHz,  $\text{CD}_3\text{OD}$ )  $\delta$  172.8, 148.4, 133.6 (two signals overlapped), 133.2, 131.5, 131.3, 130.8, 127.2, 125.6 (q,  $^1J_{\text{C-F}} = 289.5$  Hz), 122.6, 110.9, 83.1-82.0 (m), 46.5, 41.1, 39.4, 29.5, 26.4, 23.9, 23.5, 23.1, 21.8, 14.1, 14.0;  $^{19}\text{F}$  NMR (376 MHz,  $\text{CD}_3\text{OD}$ )  $\delta$  -77.2; HRMS (ESI) Calcd for  $\text{C}_{25}\text{H}_{31}\text{F}_6\text{INO}_2$   $[\text{M} + \text{H}]^+$  618.1304, found 618.1306.

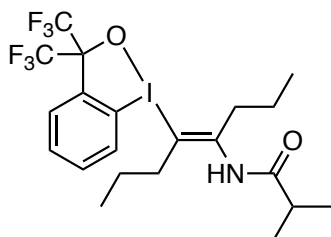

**(E)-N-(5-(3,3-Bis(trifluoromethyl)-1 $\lambda^3$ -benzo[d][1,2]iodaoxol-1(3H)-yl)oct-4-en-4-yl)isobutyramide (4ai):** Synthesized by the general procedure B in 71% yield (80.2 mg); White solid;  $R_f$  0.3 ( $\text{Et}_2\text{O}/\text{EtOAc} = 2/1$ ); m.p. 85-86  $^\circ\text{C}$ ;  $^1\text{H}$  NMR (400 MHz,  $\text{CD}_3\text{OD}$ )  $\delta$  8.17-8.13 (m, 1H), 7.82 (app. s, 1H), 7.69-7.64 (m, 2H), 2.93-2.55 (brs + m, 2H + 1H), 2.55-2.24 (brs, 2H), 1.68-1.46 (brs, 2H), 1.46-1.34 (brs, 2H), 1.23 (s, 3H), 1.21 (s, 3H), 0.92 (t,  $J = 7.4$  Hz, 3H), 0.83 (t,  $J = 7.5$  Hz, 3H);  $^{13}\text{C}$  NMR (100 MHz,  $\text{CD}_3\text{OD}$ )  $\delta$  177.7, 148.4, 133.64, 133.61, 131.5, 131.3, 130.8, 125.6 (q,  $^1J_{\text{C-F}} = 289.5$  Hz), 122.4, 110.9, 83.1-82.0 (m), 41.2, 39.4, 36.4, 23.4, 21.8, 19.9, 14.04, 13.96;  $^{19}\text{F}$  NMR (376 MHz,  $\text{CD}_3\text{OD}$ )  $\delta$  -77.2; HRMS (ESI) Calcd for  $\text{C}_{21}\text{H}_{27}\text{F}_6\text{INO}_2$   $[\text{M} + \text{H}]^+$  566.0991, found 566.0984.

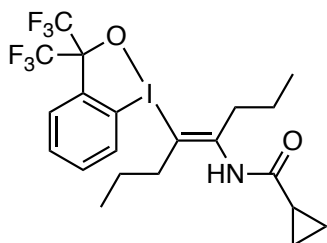

**(E)-N-(5-(3,3-Bis(trifluoromethyl)-1 $\lambda^3$ -benzo[d][1,2]iodaoxol-1(3H)-yl)oct-4-en-4-yl)cyclopropanecarboxamide (4aj):** Synthesized by the general procedure B in 71% yield (80.0 mg); White solid;  $R_f$  0.3 ( $\text{Et}_2\text{O}/\text{EtOAc} = 2/1$ ); m.p. 116-117  $^\circ\text{C}$ ;  $^1\text{H}$  NMR (400 MHz,  $\text{CD}_3\text{OD}$ )  $\delta$  8.11-8.07 (m, 1H), 7.81 (app. s, 1H), 7.67-7.61 (m, 2H), 2.94-2.57 (brs, 2H), 2.58-

2.19 (brs, 2H), 1.80-1.76 (m, 1H), 1.66-1.48 (brs, 2H), 1.48-1.30 (brs, 2H), 0.99-0.87 (m, 7H), 0.84 (t,  $J = 7.4$  Hz, 3H);  $^{13}\text{C}$  NMR (100 MHz,  $\text{CD}_3\text{OD}$ )  $\delta$  175.2, 148.6, 133.6 (two signals overlapped), 131.5, 131.3, 130.7, 125.6 (q,  $^1J_{\text{C-F}} = 289.5$  Hz), 121.9, 110.8, 83.1-82.0 (m), 41.2, 39.3, 23.4, 21.9, 15.0, 14.0, 13.9, 8.0;  $^{19}\text{F}$  NMR (376 MHz,  $\text{CD}_3\text{OD}$ )  $\delta$  -77.2; HRMS (ESI) Calcd for  $\text{C}_{21}\text{H}_{25}\text{F}_6\text{INO}_2$   $[\text{M} + \text{H}]^+$  564.0834, found 564.0836.

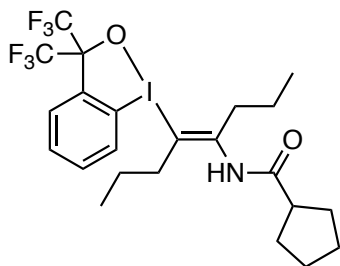

**(E)-N-(5-(3,3-Bis(trifluoromethyl)-1 $\lambda^3$ -benzo[d][1,2]iodaoxol-1(3H)-yl)oct-4-en-4-yl)cyclopentanecarboxamide (4ak):** Synthesized by the general procedure B in 65% yield (76.8 mg); White solid;  $R_f$  0.3 ( $\text{Et}_2\text{O}/\text{EtOAc} = 2/1$ ); m.p. 142-143  $^\circ\text{C}$ ;  $^1\text{H}$  NMR (400 MHz,  $\text{CD}_3\text{OD}$ )  $\delta$  8.16-8.12 (m, 1H), 7.82 (app. s, 1H), 7.69-7.64 (m, 2H), 2.87-2.80 (m, 1H), 2.78-2.56 (brs, 2H), 2.56-2.25 (brs, 2H), 2.01-1.94 (m, 2H), 1.87-1.75 (m, 4H), 1.71-1.62 (m, 2H), 1.60-1.47 (brs, 2H), 1.47-1.32 (brs, 2H), 0.92 (t,  $J = 7.4$  Hz, 3H), 0.83 (t,  $J = 7.5$  Hz, 3H);  $^{13}\text{C}$  NMR (100 MHz,  $\text{CD}_3\text{OD}$ )  $\delta$  177.8, 148.6, 133.64, 133.61, 131.5, 131.3, 130.8, 125.6 (q,  $^1J_{\text{C-F}} = 289.5$  Hz), 122.2, 110.8, 83.1-82.0 (m), 46.5, 41.2, 39.4, 31.6, 27.1, 23.4, 21.8, 14.04, 13.97;  $^{19}\text{F}$  NMR (376 MHz,  $\text{CD}_3\text{OD}$ )  $\delta$  -77.2; HRMS (ESI) Calcd for  $\text{C}_{23}\text{H}_{29}\text{F}_6\text{INO}_2$   $[\text{M} + \text{H}]^+$  592.1147, found 592.1149.

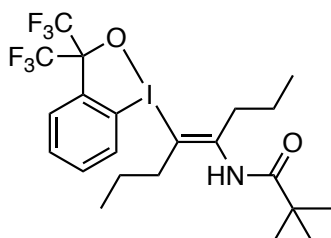

**(E)-N-(5-(3,3-Bis(trifluoromethyl)-1 $\lambda^3$ -benzo[d][1,2]iodaoxol-1(3H)-yl)oct-4-en-4-yl)pivalamide (4al):** Synthesized by the general procedure B in 67% yield (77.6 mg); White solid;  $R_f$  0.3 ( $\text{Et}_2\text{O}/\text{EtOAc} = 2/1$ ); m.p. 65-67  $^\circ\text{C}$ ;  $^1\text{H}$  NMR (400 MHz,  $\text{CD}_3\text{OD}$ )  $\delta$  8.18-8.16 (m,

1H), 7.82 (app. d,  $J = 6.7$  Hz, 1H), 7.71-7.64 (m, 2H), 2.95-2.21 (brs + m, 2H + 2H), 1.67-1.46 (brs, 2H), 1.46-1.35 (brs, 2H), 1.30 (s, 9H), 0.92 (t,  $J = 7.3$  Hz, 3H), 0.83 (t,  $J = 7.4$  Hz, 3H);  $^{13}\text{C}$  NMR (100 MHz,  $\text{CD}_3\text{OD}$ )  $\delta$  180.0, 149.1, 133.7, 133.6, 131.5, 131.3, 130.9, 125.6 (q,  $J_{\text{C-F}} = 289.6$  Hz), 123.2, 110.9, 83.1-81.9 (m), 41.2, 40.3, 39.3, 27.8, 23.3, 21.7, 14.1, 14.0;  $^{19}\text{F}$  NMR (376 MHz,  $\text{CD}_3\text{OD}$ )  $\delta$  -77.2; HRMS (ESI) Calcd for  $\text{C}_{22}\text{H}_{29}\text{F}_6\text{INO}_2$   $[\text{M} + \text{H}]^+$  580.1147, found 580.1145.

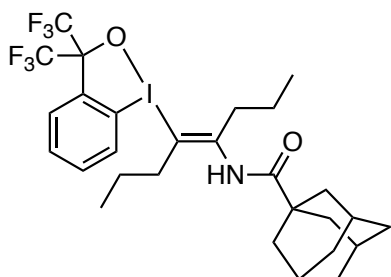

**(E)-N-(5-(3,3-Bis(trifluoromethyl)-1 $\lambda^3$ -benzo[d][1,2]iodaoxol-1(3H)-yl)oct-4-en-4-yl)-(1-Ad)amide (4am):** Synthesized by the general procedure B in 26% yield (34.2 mg); White solid;  $R_f$  0.3 ( $\text{Et}_2\text{O}/\text{EtOAc} = 2/1$ ); m.p. 161-162 °C;  $^1\text{H}$  NMR (400 MHz,  $\text{CD}_3\text{OD}$ )  $\delta$  8.19-8.14 (m, 1H), 7.82 (app. d,  $J = 6.4$  Hz, 1H), 7.71-7.64 (m, 2H), 2.55 (app. d,  $J = 34.6$  Hz, 4H), 2.09 (brs, 3H), 1.99 (app. d,  $J = 2.6$  Hz, 6H), 1.82 (app. t,  $J = 15.1$  Hz, 6H), 1.63-1.45 (brs, 2H), 1.45-1.31 (brs, 2H), 0.92 (t,  $J = 7.3$  Hz, 3H), 0.82 (t,  $J = 7.4$  Hz, 3H);  $^{13}\text{C}$  NMR (100 MHz,  $\text{CD}_3\text{OD}$ )  $\delta$  179.5, 149.1, 133.7, 133.6, 131.5, 131.3, 130.9, 125.6 (q,  $^1J_{\text{C-F}} = 289.9$  Hz), 123.1, 110.9, 83.1-81.9 (m), 42.6, 41.2, 40.3, 39.4, 37.5, 29.7, 23.3, 21.7, 14.1, 14.0;  $^{19}\text{F}$  NMR (376 MHz,  $\text{CD}_3\text{OD}$ )  $\delta$  -77.3; HRMS (ESI) Calcd for  $\text{C}_{28}\text{H}_{35}\text{F}_6\text{INO}_2$   $[\text{M} + \text{H}]^+$  658.1617, found 658.1616.

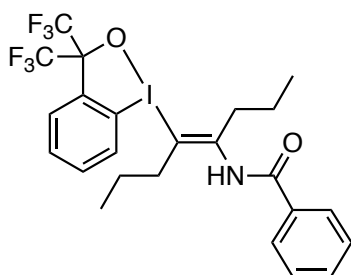

**(E)-N-(5-(3,3-Bis(trifluoromethyl)-1 $\lambda^3$ -benzo[d][1,2]iodaoxol-1(3H)-yl)oct-4-en-4-yl)benzamide (4an):** Synthesized by the general procedure B in 46% yield (55.1 mg); White solid;

$R_f$  0.3 (Et<sub>2</sub>O/EtOAc = 2/1); m.p. 136-137 °C; <sup>1</sup>H NMR (400 MHz, CD<sub>3</sub>OD) δ 8.28-8.26 (m, 1H), 7.94-7.92 (m, 2H), 7.85 (app. d,  $J$  = 6.8 Hz, 1H), 7.73-7.66 (m, 2H), 7.63-7.59 (m, 1H), 7.55-7.52 (m, 2H), 2.80-2.51 (app. q,  $J$  = 37.7 Hz, 4H), 1.74-1.52 (brs, 2H), 1.52-1.36 (brs, 2H), 0.91 (t,  $J$  = 7.3 Hz, 3H), 0.85 (t,  $J$  = 7.4 Hz, 3H); <sup>13</sup>C NMR (100 MHz, CD<sub>3</sub>OD) δ 169.0, 148.8, 135.0, 133.7, 133.6, 133.4, 131.5, 131.4, 130.9, 129.8, 128.7, 125.6 (q,  $^1J_{C-F}$  = 289.9 Hz), 123.3, 110.9, 83.1-82.0 (m), 41.3, 39.4, 23.5, 21.9, 14.1, 14.0; <sup>19</sup>F NMR (376 MHz, CD<sub>3</sub>OD) δ -77.2; HRMS (ESI) Calcd for C<sub>24</sub>H<sub>25</sub>F<sub>6</sub>INO<sub>2</sub> [M + H]<sup>+</sup> 600.0834, found 600.0830.

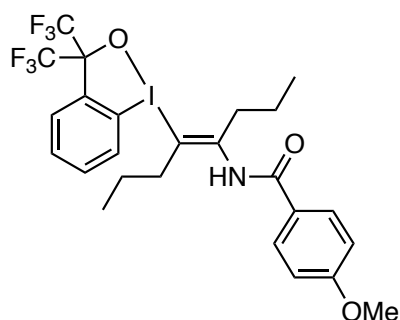

**(E)-N-(5-(3,3-Bis(trifluoromethyl)-1λ<sup>3</sup>-benzo[d][1,2]iodaoxol-1(3H)-yl)oct-4-en-4-yl)-4-methoxybenzamide (4ao):** Synthesized by the general procedure B in 45% yield (56.6 mg); White solid;  $R_f$  0.3 (Et<sub>2</sub>O/EtOAc = 2/1); m.p. 136-137 °C; <sup>1</sup>H NMR (400 MHz, CD<sub>3</sub>OD) δ 8.28-8.26 (m, 1H), 7.94-7.90 (m, 2H), 7.84 (app. d,  $J$  = 6.7 Hz, 1H), 7.73-7.67 (m, 2H), 7.08-7.04 (m, 2H), 4.89 (s, 3H), 3.11-2.22 (brs, 4H), 1.68-1.51 (brs, 2H), 1.51-1.36 (brs, 2H), 0.91 (t,  $J$  = 7.3 Hz, 3H), 0.85 (t,  $J$  = 7.4 Hz, 3H); <sup>13</sup>C NMR (100 MHz, CD<sub>3</sub>OD) δ 168.5, 164.6, 149.1, 133.7, 133.6, 131.5, 131.3, 131.0, 130.8, 126.9, 125.6 (q,  $^1J_{C-F}$  = 290.3 Hz), 122.9, 115.0, 111.0, 82.9-82.3 (m), 56.0, 41.3, 39.4, 23.5, 21.9, 14.1, 14.0; <sup>19</sup>F NMR (376 MHz, CD<sub>3</sub>OD) δ -77.2; HRMS (ESI) Calcd for C<sub>25</sub>H<sub>27</sub>F<sub>6</sub>INO<sub>2</sub> [M + H]<sup>+</sup> 630.0940, found 630.0937.

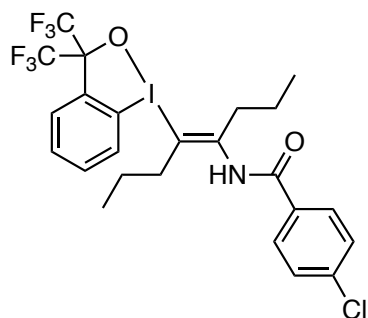

**(E)-N-(5-(3,3-Bis(trifluoromethyl)-1 $\lambda^3$ -benzo[d][1,2]iodaoxol-1(3H)-yl)oct-4-en-4-yl)-4-chlorobenzamide (4ap):** Synthesized by the general procedure B in 54% yield (68.4 mg); White solid;  $R_f$  0.3 (Et<sub>2</sub>O/EtOAc = 2/1); m.p. 130-131 °C; <sup>1</sup>H NMR (400 MHz, CD<sub>3</sub>OD)  $\delta$  8.27-8.23 (m, 1H), 7.93-7.91 (m, 2H), 7.86-7.84 (m, 2H), 7.72-7.66 (m, 2H), 7.57-7.53 (m, 2H), 7.47-7.53 (m, 1H), 3.31-2.22 (brs, 4H), 1.71-1.52 (brs, 2H), 1.51-1.32 (brs, 2H), 0.91 (t,  $J$  = 7.3 Hz, 3H), 0.85 (t,  $J$  = 7.4 Hz, 3H); <sup>13</sup>C NMR (100 MHz, CD<sub>3</sub>OD)  $\delta$  167.7, 148.6, 139.5, 133.64, 133.60, 131.5, 131.3, 130.9, 130.44, 130.36, 129.7, 125.6 (q,  $^1J_{C-F}$  = 290.3 Hz), 123.3, 111.0, 82.9-82.3 (m), 41.2, 39.4, 23.5, 21.9, 14.1, 14.0; <sup>19</sup>F NMR (376 MHz, CD<sub>3</sub>OD)  $\delta$  -77.2; HRMS (ESI) Calcd for C<sub>24</sub>H<sub>24</sub>ClF<sub>6</sub>INO<sub>2</sub> [M + H]<sup>+</sup> 634.0444, found 634.0446.

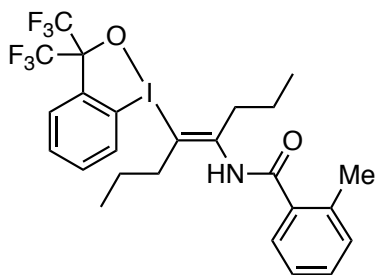

**(E)-N-(5-(3,3-Bis(trifluoromethyl)-1 $\lambda^3$ -benzo[d][1,2]iodaoxol-1(3H)-yl)oct-4-en-4-yl)-4-methylbenzamide (4aq):** Synthesized by the general procedure B in 53% yield (65.0 mg); White solid;  $R_f$  0.3 (Et<sub>2</sub>O/EtOAc = 2/1); m.p. 158-159 °C; <sup>1</sup>H NMR (400 MHz, CD<sub>3</sub>OD)  $\delta$  8.26-8.22 (m, 1H), 7.85 (app. s, 1H), 7.70-7.66 (m, 2H), 7.46 (d,  $J$  = 7.6 Hz, 1H), 7.41 (t,  $J$  = 6.7 Hz, 1H), 7.34-7.29 (m, 2H), 3.00-2.69 (brs, 2H), 2.69-2.33 (brs + s, 2H + 3H), 1.74-1.39 (brs, 4H), 0.98 (t,  $J$  = 7.4 Hz, 3H), 0.89 (t,  $J$  = 7.4 Hz, 3H); <sup>13</sup>C NMR (100 MHz, CD<sub>3</sub>OD)  $\delta$  171.5, 148.3, 137.2, 137.1, 133.7, 133.6, 132.1, 131.6, 131.5, 131.4, 130.9, 128.1, 127.0, 125.6 (q,  $J_{C-F}$  = 289.6 Hz), 123.3, 111.0, 83.1-82.0 (m), 41.3, 39.4, 23.5, 21.9, 14.1, 14.0; <sup>19</sup>F NMR (376 MHz, CD<sub>3</sub>OD)  $\delta$  -77.2; HRMS (ESI) Calcd for C<sub>25</sub>H<sub>27</sub>F<sub>6</sub>INO<sub>2</sub> [M + H]<sup>+</sup> 614.0991, found 614.0990.

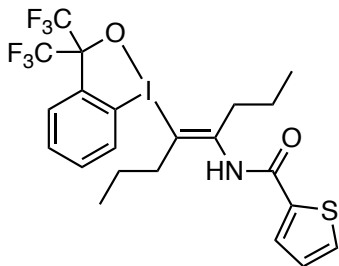

**(E)-N-(5-(3,3-Bis(trifluoromethyl)-1 $\lambda^3$ -benzo[d][1,2]iodaoxol-1(3H)-yl)-oct-4-en-4-yl)thiophene-2-carboxamide (4ar):** Synthesized by the general procedure B in 54% yield (65.4 mg); White solid;  $R_f$  0.3 (Et<sub>2</sub>O/EtOAc = 2/1); m.p. 107-108 °C; <sup>1</sup>H NMR (400 MHz, CD<sub>3</sub>OD)  $\delta$  8.23-8.21 (m, 1H), 7.87-7.83 (m, 2H), 7.76-7.75 (m, 1H), 7.72-7.65 (m, 2H), 7.19 (q,  $J$  = 4.8Hz, 1H), 2.64 (app. q,  $J$  = 40.2 Hz, 4H), 1.71-1.51 (brs, 2H), 1.51-1.31 (brs, 2H), 0.90 (t,  $J$  = 7.4 Hz, 3H), 0.84 (t,  $J$  = 7.4 Hz, 3H); <sup>13</sup>C NMR (100 MHz, CD<sub>3</sub>OD)  $\delta$  162.9, 148.3, 139.3, 133.7, 133.6, 133.1, 131.5, 131.3, 130.9, 130.8, 129.1, 125.6 (q, <sup>1</sup> $J_{C-F}$  = 289.7 Hz), 123.6, 111.0, 83.1-82.0 (m), 41.2, 39.7, 23.5, 21.9, 19.9, 14.1, 14.0; <sup>19</sup>F NMR (376 MHz, CD<sub>3</sub>OD)  $\delta$  -77.2; HRMS (ESI) Calcd for C<sub>22</sub>H<sub>23</sub>F<sub>6</sub>INO<sub>2</sub>S [M + H]<sup>+</sup> 606.0398, found 606.0396.

## Control Experiments

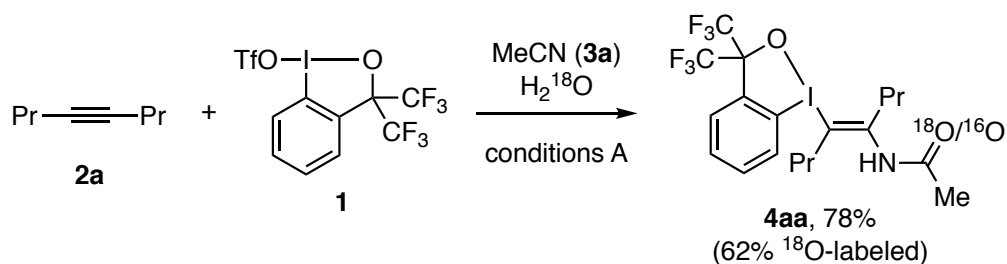

**Reactions using  $^{18}\text{O}$ -labeled water (conditions A):** The reaction between **1** and **2a** in MeCN was performed on a 0.2 mmol scale under conditions A, except using  $\text{H}_2^{18}\text{O}$  instead of  $\text{H}_2\text{O}$ . Standard workup and purification afforded the product **4aa** (83.5 mg, 78%). Analysis of the peak intensities in the ESI-MS spectrum of this product indicated 62% incorporation of  $^{18}\text{O}$  isotope (see below).

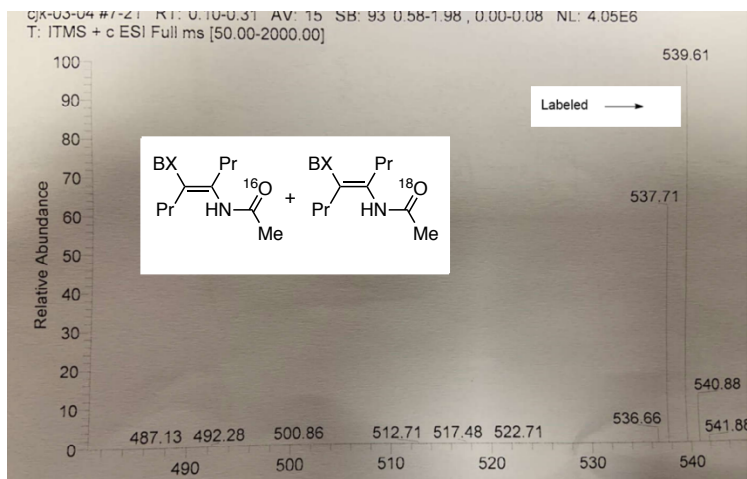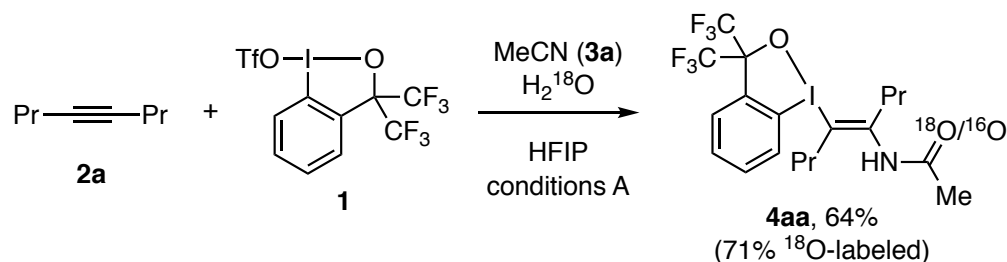

**Reactions using  $^{18}\text{O}$ -labeled water (conditions B):** The reaction between **1**, **2a** and MeCN in HFIP was performed under conditions B, except using  $\text{H}_2^{18}\text{O}$  instead of  $\text{H}_2\text{O}$ . Standard workup and purification afforded the product **4aa** (68.7 mg, 64%). Analysis of the peak intensities in the ESI-MS spectrum of this product indicated 71% incorporation of  $^{18}\text{O}$  isotope (see below).

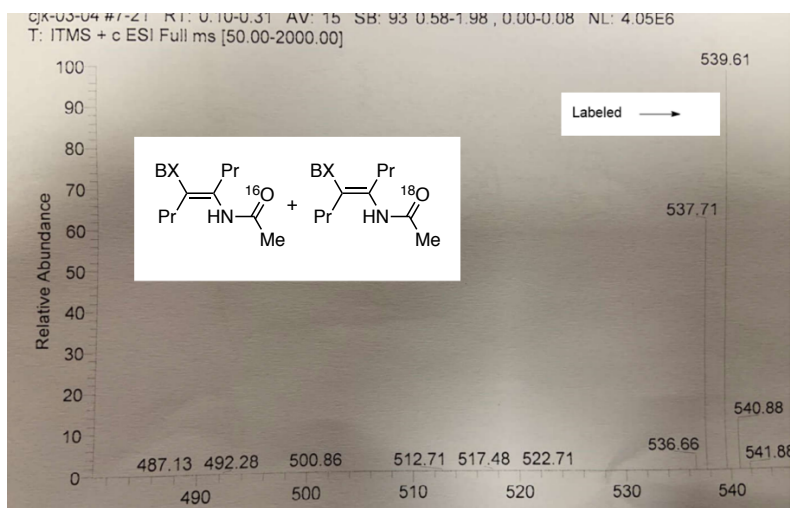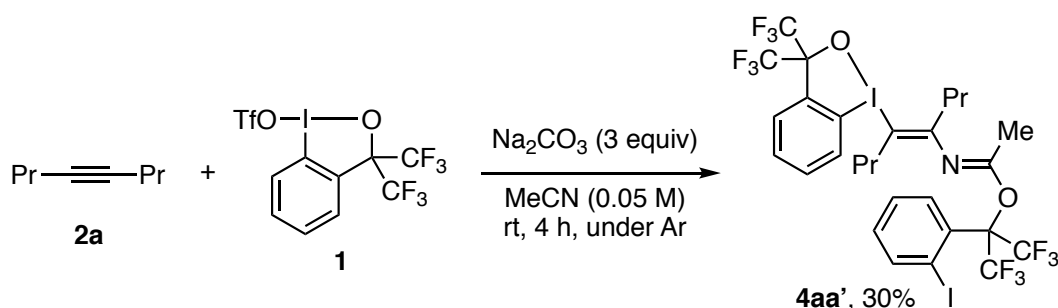

**Reaction in the absence of H<sub>2</sub>O: 1,1,1,3,3,3-Hexafluoro-2-(2-iodophenyl)propan-2-yl (*E*)-*N*-((*E*)-5-(3,3-bis(trifluoromethyl)-1 $\lambda^3$ -benzo[*d*][1,2]iodaoxol-1(3*H*)-yl)oct-4-en-4-yl)acetimidate (**4aa'**).** The reaction between **1** and **2a** in MeCN was performed on a 0.1 mmol scale under conditions A, except for the omission of H<sub>2</sub>O. Standard workup and purification afforded the acetimidate derivative **4ax** as a white solid (26.7 mg, 30%). *R*<sub>f</sub> 0.2 (hexane/EtOAc = 3/1); m.p. 218-220 °C; <sup>1</sup>H NMR (400 MHz, CDCl<sub>3</sub>)  $\delta$  8.16-8.04 (m, 1H), 7.85 (d, *J* = 7.6 Hz, 1H), 7.57 (t, *J* = 7.4 Hz, 1H), 7.53-7.41 (m, 3H), 7.34 (d, *J* = 8.1 Hz, 1H), 7.12-7.02 (m, 1H), 2.47- 2.12 (m, 7H), 1.44-1.25 (m, 2H), 1.02-0.89 (m, 2H), 0.86 (t, *J* = 7.3 Hz, 3H), 0.65 (t, *J* = 7.3 Hz, 3H); <sup>13</sup>C NMR (100 MHz, CDCl<sub>3</sub>)  $\delta$  156.2, 153.5, 144.2, 132.2, 131.5, 130.8, 130.5 (two signals overlapped), 130.2, 128.9, 127.9, 126.5, 124.2 (q, *J*<sub>C-F</sub> = 290.8 Hz), 122.1 (q, *J*<sub>C-F</sub> = 289.4 Hz), 109.9, 107.5, 92.1, 84.7-83.5 (m), 81.8-80.6 (m), 41.1, 36.2, 23.0, 21.7, 17.9, 13.40, 13.39; <sup>19</sup>F NMR (376 MHz, CDCl<sub>3</sub>)  $\delta$  -76.0 (two signals overlapped); HRMS (ESI) Calcd for C<sub>28</sub>H<sub>26</sub>F<sub>12</sub>I<sub>2</sub>NO<sub>2</sub> [M + H]<sup>+</sup> 889.9861, found 889.9852.



## Product Transformations

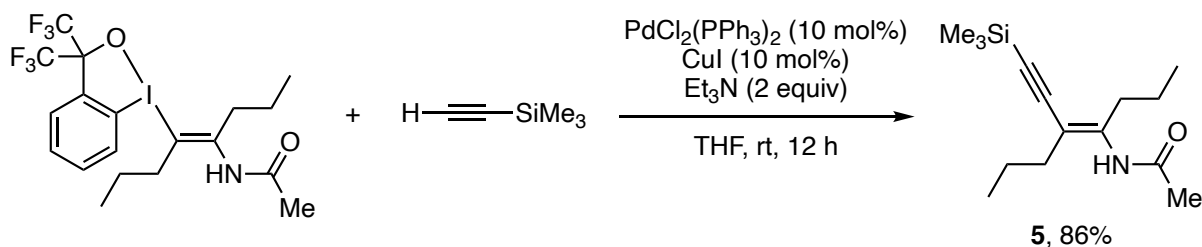

**(E)-N-(5-((Trimethylsilyl)ethynyl)oct-4-en-4-yl)acetamide (5):** Under N<sub>2</sub> atmosphere, an 8-mL vial equipped with a stir bar was charged sequentially with **4aa** (53.7 mg, 0.10 mmol), PdCl<sub>2</sub>(PPh<sub>3</sub>)<sub>2</sub> (7.0 mg, 0.010 mmol), CuI (1.9 mg, 0.010 mmol), and THF (0.5 mL). To the mixture was added trimethylsilylacetylene (19.6 mg, 0.20 mmol) and Et<sub>3</sub>N (20.2 mg, 0.20 mmol), and the resulting mixture was stirred at room temperature for 12 h. The mixture was diluted with EtOAc (10 mL) and washed with H<sub>2</sub>O (5 mL) and brine (5 mL). The organic layer was dried over MgSO<sub>4</sub> and concentrated under reduced pressure. The residue was purified by flash column chromatography on silica gel (eluent: hexane/EtOAc = 3/1) to afford the title compound as a yellow oil (22.8 mg, 86% yield); <sup>1</sup>H NMR (400 MHz, CDCl<sub>3</sub>) δ 6.69-6.35 (brs, 1H), 2.71 (brs, 2H), 2.06-2.01 (m, 5H), 1.59-1.45 (m, 4H), 0.94-0.90 (m, 6H), 0.18 (s, 9H); <sup>13</sup>C NMR (100 MHz, CDCl<sub>3</sub>) δ 167.7, 143.2, 113.6, 104.4, 98.5, 34.4, 32.5, 24.1, 21.1 (two signals overlapped), 13.7 (two signals overlapped), 0.00; HRMS (ESI) Calcd for C<sub>15</sub>H<sub>28</sub>NOSi [M + H]<sup>+</sup> 267.1936, found 267.1956.

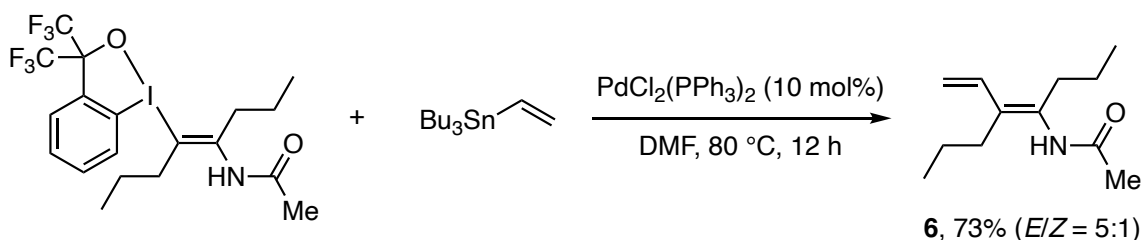

**(E)-1-Methoxy-2-methylbuta-1,3-dien-1-ylbenzene (6):** Under N<sub>2</sub> atmosphere, a 10-mL Schlenk tube equipped with a stir bar was charged sequentially with **4aa** (53.7 mg, 0.10 mmol), PdCl<sub>2</sub>(PPh<sub>3</sub>)<sub>2</sub> (7.0 mg, 0.01 mmol), and DMF (0.5 mL). To the solution was added tributyl(vinyl)tin (63.4 mg, 0.20 mmol), and the resulting mixture was stirred at 80 °C for 12 h. The mixture was cooled to room temperature, diluted with Et<sub>2</sub>O (10 mL), and washed with

H<sub>2</sub>O (5 mL) and brine (5 mL). The organic layer was dried over MgSO<sub>4</sub> and concentrated under reduced pressure. The residue was purified by flash column chromatography on silica gel (eluent: hexane/EtOAc = 3/1) to afford the title compound **5** as a white solid (14.2 mg, 73% yield, *E/Z* = 5:1); <sup>1</sup>H NMR (400 MHz, CDCl<sub>3</sub>, two isomers) δ 6.40 (app. dd, *J* = 17.2, 11.0 Hz, 1H + 0.2H, major + minor), 6.57-6.53 (brs, 1H, major), 6.42-6.30 (brs, 1H, minor), 5.34 (d, *J* = 18.3 Hz, 0.2H, minor), 5.23 (app. d, *J* = 17.3 Hz, 1H + 0.2H, major + minor), 5.10 (d, *J* = 11.1 Hz, 1H, major), 2.54 (t, *J* = 7.6 Hz, 2H, major), 2.20 (app. t, *J* = 8.0 Hz, 2H + 0.4H, major + minor), 2.08 (s, 3H, major), 1.99-1.88 (brs, 0.6H, minor), 1.50-1.37 (m, 4H + 0.8H, major + minor), 0.94-0.88 (m, 6H + 1.2H, major + minor); <sup>13</sup>C NMR (100 MHz, CDCl<sub>3</sub>, major isomer) δ 168.4, 134.9, 133.1, 129.9, 113.7, 31.4, 29.0, 23.9, 21.7, 14.3, 13.8; HRMS (ESI) Calcd for C<sub>12</sub>H<sub>22</sub>NO [M + H]<sup>+</sup> 196.1701, found 196.1699.

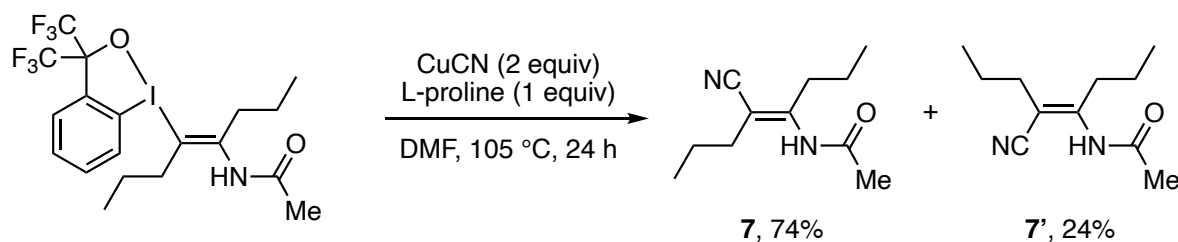

**(E)-N-(5-Cyano-oct-4-en-4-yl)acetamide (7):** Under N<sub>2</sub> atmosphere, an 8-mL vial equipped with a stir bar was charged sequentially with CuCN (17.9 mg, 0.20 mmol), L-proline (11.5 mg, 0.10 mmol), and DMF (0.5 mL). After stirring at room temperature for 10 min, **4aa** (53.7 mg, 0.10 mmol) was added, and the resulting mixture was stirred at 105 °C for 24 h. The mixture was cooled to room temperature, diluted with EtOAc (15 mL), and washed with saturated aq. NH<sub>4</sub>Cl (5 mL), H<sub>2</sub>O (5 mL) and brine (5 mL). The organic layer was dried over MgSO<sub>4</sub> and concentrated under reduced pressure. The residue was purified by flash column chromatography on silica gel (eluent: hexane/EtOAc = 3/1) to afford the title compound as a colorless oil (14.4 mg, 74% yield) and its isomer **7'** as a white solid (4.7 mg, 24% yield); <sup>1</sup>H NMR (400 MHz, CDCl<sub>3</sub>) δ 6.84 (s, 1H), 2.84 (t, *J* = 7.7 Hz, 2H), 2.12 (s, 3H), 2.10 (t, *J* = 7.6 Hz, 2H), 1.66-1.51 (m, 4H), 0.970 (t, *J* = 7.6 Hz, 3H), 0.965 (t, *J* = 7.2 Hz, 3H); <sup>13</sup>C NMR (100 MHz, CDCl<sub>3</sub>) δ 167.5, 151.6, 119.0, 100.3, 35.0, 30.2, 24.4, 21.4, 21.0, 13.5, 13.4; HRMS (ESI)

Calcd for C<sub>11</sub>H<sub>19</sub>N<sub>2</sub>O [M + H]<sup>+</sup> 195.1497, found 195.1498.

**(Z)-N-(5-Cyanoct-4-en-4-yl)acetamide (7')**: <sup>1</sup>H NMR (400 MHz, CDCl<sub>3</sub>) δ 7.33 (s, 1H), 2.73 (t, *J* = 7.8 Hz, 2H), 2.17 (t, *J* = 7.8 Hz, 2H), 2.13 (s, 3H), 1.59-1.48 (m, 4H), 0.97 (t, *J* = 7.0 Hz, 3H), 0.95 (t, *J* = 7.0 Hz, 3H); <sup>13</sup>C NMR (100 MHz, CDCl<sub>3</sub>) δ 168.0, 153.5, 118.2, 95.8, 30.4, 29.5, 24.7, 22.1, 21.4, 13.8, 13.4; HRMS (ESI) Calcd for C<sub>11</sub>H<sub>19</sub>N<sub>2</sub>O [M + H]<sup>+</sup> 195.1497, found 195.1494.

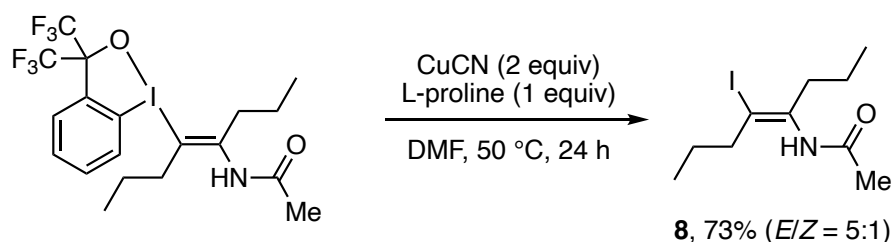

**(E)-N-(5-Iodoct-4-en-4-yl)acetamide (8)**: Under N<sub>2</sub> atmosphere, an 8-mL vial equipped with a stir bar was charged sequentially with CuCN (17.9 mg, 0.20 mmol), L-proline (11.5 mg, 0.10 mmol), and DMF (0.5 mL). After stirring at room temperature for 10 min, **4aa** (53.7 mg, 0.10 mmol) was added, and the resulting mixture was stirred at 50 °C for 24 h. The mixture was cooled to room temperature, diluted with EtOAc (15 mL), and washed with saturated aq. NH<sub>4</sub>Cl (5 mL), H<sub>2</sub>O (5 mL) and brine (5 mL). The organic layer was dried over MgSO<sub>4</sub> and concentrated under reduced pressure. The residue was purified by flash column chromatography on silica gel (eluent: hexane/EtOAc = 3/1) to afford the title compound as a colorless solid (21.6 mg, 73% yield, *E/Z* = 5:1); <sup>1</sup>H NMR (400 MHz, CDCl<sub>3</sub>) δ 6.40 (s, 1H, major), 6.24 (s, 0.2H, minor), 2.58 (t, *J* = 7.5 Hz, 2H, major), 2.51-2.41 (m, 2H + 0.8H, major + minor), 2.06 (s, 3H, major), 1.94 (s, 0.6H, minor), 1.59-1.42 (m, 4H + 0.8 H, major + minor), 0.96-0.87 (m, 6H + 1.2 H, major + minor); <sup>13</sup>C NMR (100 MHz, CDCl<sub>3</sub>, both isomers) δ 172.0, 168.0, 137.5, 136.9, 109.1, 104.0, 42.7, 41.5, 41.2, 40.3, 29.7, 23.3, 22.7, 22.5, 20.4, 20.2, 20.0, 13.7, 13.0, 12.8; HRMS (ESI) Calcd for C<sub>10</sub>H<sub>19</sub>INO [M + H]<sup>+</sup> 296.0511, found 296.0510.

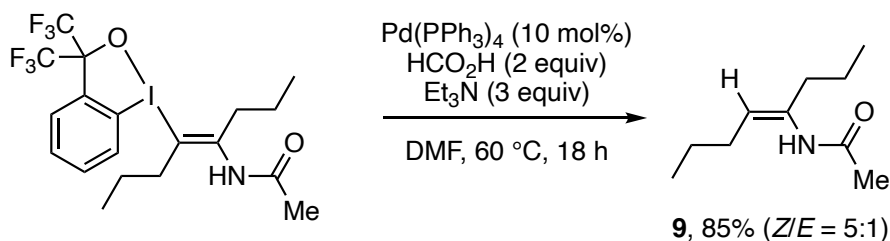

**(Z)-N-(Oct-4-en-4-yl)acetamide (9):** Under  $\text{N}_2$  atmosphere, a Schlenk tube equipped with a stir bar was charged sequentially with  $\text{HCO}_2\text{H}$  (9.2 mg, 0.20 mmol),  $\text{Et}_3\text{N}$  (30.3 mg, 0.30 mmol), and DMF (0.5 mL). After stirring at room temperature for 10 min, **4aa** (53.7 mg, 0.10 mmol) and  $\text{Pd(PPh}_3)_4$  (11.6 mg, 0.010 mmol) were added, and the resulting mixture was stirred at 60 °C for 18 h. The mixture was cooled to room temperature, diluted with  $\text{Et}_2\text{O}$  (15 mL), and washed with  $\text{H}_2\text{O}$  (5 mL) and brine (5 mL). The organic layer was dried over  $\text{MgSO}_4$  and concentrated under reduced pressure. The residue was purified by flash column chromatography on silica gel (eluent: hexane/ $\text{EtOAc}$  = 3/1) to afford the title compound as a colorless liquid (14.4 mg, 85% yield, *E/Z* = 5:1);  $^1\text{H NMR}$  (400 MHz,  $\text{CDCl}_3$ , two isomers)  $\delta$  6.42 (s, 1H, major), 6.19 (s, 0.2H, minor), 5.32 (t,  $J$  = 5.5 Hz, 0.2H, minor), 5.05 (t,  $J$  = 7.0 Hz, 1H, major), 2.28 (t,  $J$  = 7.4 Hz, 2H, major), 2.05 (s, 3H), 1.97-1.91 (m, 2H + 0.4H, major + minor), 1.83 (s, 0.6H, minor), 1.47-1.34 (m, 4H + 0.8H, major + minor), 0.92-0.87 (m, 6H + 1.2H, major + minor);  $^{13}\text{C NMR}$  (100 MHz,  $\text{CDCl}_3$ , both isomers)  $\delta$  172.6, 168.1, 134.7, 134.3, 127.3, 121.5, 39.3, 36.9, 29.3, 29.0, 23.7, 22.4, 22.2, 20.6, 20.3, 20.2, 19.8, 13.8, 13.7, 13.5; HRMS (ESI) Calcd for  $\text{C}_{10}\text{H}_{20}\text{NO}$  [ $\text{M} + \text{H}$ ] $^+$  170.1545, found 170.1544.

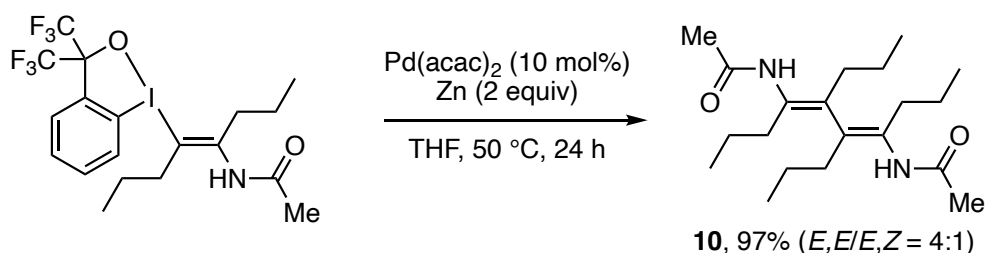

***N, N'*-((4*E*, 6*E*)-5,6-Dipropyldeca-4,6-diene-4,7-diyl)diacetamide (10):** Under  $\text{N}_2$  atmosphere, a 10-mL Schlenk tube equipped with a stir bar was charged sequentially with **4aa** (53.7 mg, 0.10 mmol),  $\text{Pd(acac)}_2$  (3.0 mg, 0.10 mmol),  $\text{Zn}$  (13.0 mg, 0.20 mmol), and THF (1 mL). The resulting mixture was stirred at 50 °C for 24 h. The mixture was cooled to room

temperature, diluted with EtOAc (15 mL), and washed with H<sub>2</sub>O (5 mL) and brine (5 mL). The organic layer was dried over MgSO<sub>4</sub> and concentrated under reduced pressure. The residue was purified by flash column chromatography on silica gel (eluent: hexane/EtOAc = 3/1) to afford the title compound as a colorless solid (16.3 mg, 97% yield, (*E,E*)/(*E,Z*) = 4:1); <sup>1</sup>H NMR (400 MHz, CDCl<sub>3</sub>) δ 6.31 (s, 2H, major), 6.16 (s, 0.5H, minor), 2.59 (t, *J* = 7.8 Hz, 4H, major), 2.48-2.41 (m, 4H + 1H, major + minor), 2.06 (s, 6H, major), 1.94 (s, 1.6H, minor), 1.57-1.44 (m, 8H + 2H, major + minor), 0.96-0.87 (m, 12H + 3H, major + minor); <sup>13</sup>C NMR (100 MHz, CDCl<sub>3</sub>, major isomer) δ 167.9, 136.8, 104.0, 41.5, 40.3, 23.4, 22.5, 20.4, 13.7, 13.0; HRMS (ESI) Calcd for C<sub>20</sub>H<sub>37</sub>N<sub>2</sub>O<sub>2</sub> [M + H]<sup>+</sup> 337.2855, found 337.2857.

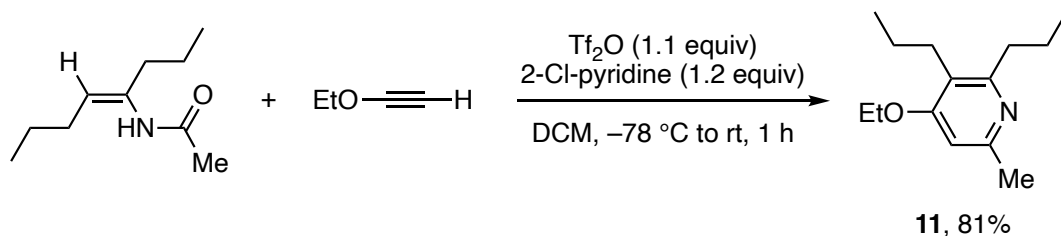

**4-Ethoxy-6-methyl-2,3-dipropylpyridine (11):** This and other pyridine syntheses were performed according to the literature procedure.<sup>7</sup> Under N<sub>2</sub> atmosphere, a 10-mL Schlenk tube equipped with a stir bar was charged sequentially with the enamide **9** (14.4 mg, 0.08 mmol) and 2-chloropyridine (9.6 μL, 0.10 mmol), and DCM (0.5 mL). The mixture was cooled to -78 °C, and trifluoromethanesulfonic anhydride (Tf<sub>2</sub>O, 15.8 μL, 0.09 mmol) was added dropwise via syringe. After 5 min, the reaction mixture was placed in an ice-water bath, and then ethyl ethynyl ether (33.0 μL, 0.17 mmol, 50% wt. in hexane) was added via syringe. The resulting solution was allowed to warm to ambient temperature. After 1 h, triethylamine (80 μL) was introduced to neutralize the trifluoromethanesulfonate salts. DCM (5 mL) was added to dilute the mixture and the layers were separated. The organic layer was washed with brine (2 mL) and dried over MgSO<sub>4</sub>. The volatiles were removed under reduced pressure and the residue was purified by flash column chromatography on silica gel (eluent: hexane/EtOAc/Et<sub>3</sub>N = 100/30/1) to give the title compound as a yellow liquid (15.2 mg, 81% yield); <sup>1</sup>H NMR (500 MHz, CDCl<sub>3</sub>) δ 6.45 (s, 1H), 4.02 (q, *J* = 7.0 Hz, 2H), 2.71-2.67 (m, 2H),

2.57-2.54 (m, 2H), 2.45 (s, 3H), 1.71-1.63 (m, 2H), 1.54-1.46 (m, 2H), 1.42 (t,  $J = 7.0$  Hz, 3H), 0.99 (t,  $J = 7.3$  Hz, 3H), 0.96 (t,  $J = 7.4$  Hz, 3H);  $^{13}\text{C}$  NMR (125 MHz,  $\text{CDCl}_3$ )  $\delta$  163.4, 160.2, 156.2, 121.0, 103.8, 63.2, 37.3, 27.2, 24.7, 23.7, 23.1, 14.6, 14.3; HRMS (ESI) Calcd for  $\text{C}_{14}\text{H}_{24}\text{NO}$   $[\text{M} + \text{H}]^+$  222.1858, found 222.1853.

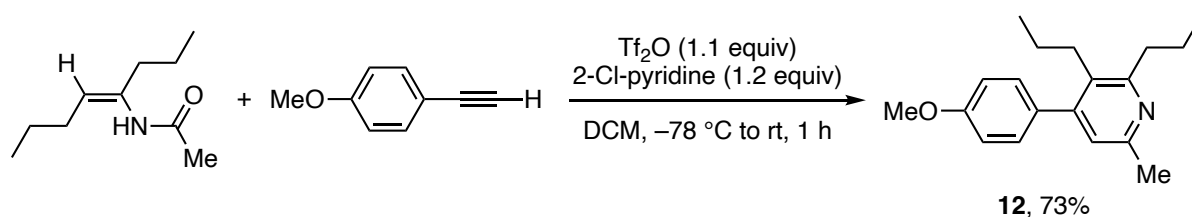

**4-(4-Methoxyphenyl)-6-methyl-2,3-dipropylpyridine (12):** The reaction between the enamide **9** (13.9 mg, 0.082 mmol) and 4-ethynylanisole (20.7  $\mu\text{L}$ , 0.16 mmol) was performed by the same procedure as described for the synthesis of **11**. Purification of the crude product by flash column chromatography on silica gel (eluent: hexane/EtOAc/ $\text{Et}_3\text{N}$  = 100/10/1) afforded the title compound as a yellow liquid (16.9 mg, 73% yield);  $^1\text{H}$  NMR (500 MHz,  $\text{CDCl}_3$ )  $\delta$  7.18 (d,  $J = 8.6$  Hz, 2H), 6.94 (d,  $J = 8.5$  Hz, 2H), 6.78 (s, 1H), 3.86 (s, 3H), 2.80-2.76 (m, 2H), 2.53-2.49 (m, 2H), 2.49 (s, 3H), 1.80-1.72 (m, 2H), 1.41-1.31 (m, 2H), 1.04 (t,  $J = 7.2$  Hz, 3H), 0.79 (t,  $J = 7.3$  Hz, 3H);  $^{13}\text{C}$  NMR (125 MHz,  $\text{CDCl}_3$ )  $\delta$  160.2, 158.9, 154.2, 150.1, 133.0, 130.2, 129.6, 122.4, 113.5, 55.3, 37.6, 30.6, 24.3, 24.0, 23.8, 14.43, 14.38; HRMS (ESI) Calcd for  $\text{C}_{19}\text{H}_{26}\text{NO}$   $[\text{M} + \text{H}]^+$  284.2014, found 284.2036.

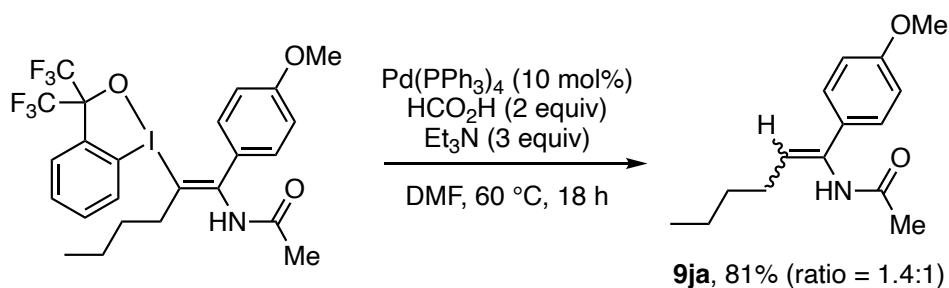

**N-(1-(4-Methoxyphenyl)hex-1-en-1-yl)acetamide (9ja):** The hydrodehalogenation of **4ja** (61.5 mg, 0.10 mmol) was performed by the same procedure as described for **4aa**. The crude product was purified by flash column chromatography on silica gel (eluent: hexane/EtOAc = 3/1) to afford the title compound as a colorless solid (20.0 mg, 81% yield, stereoisomer ratio =

1.4:1);  $^1\text{H}$  NMR (400 MHz,  $\text{CDCl}_3$ )  $\delta$  7.36 (d,  $J = 8.6$  Hz, 1.4H, minor), 7.30 (d,  $J = 8.8$  Hz, 2H, major), 6.87 (d,  $J = 8.7$  Hz, 1.4H, minor), 6.83 (d,  $J = 8.7$  Hz, 2H, major), 6.71 (s, 0.6H, minor), 6.63 (s, 1H, major), 5.81 (t,  $J = 7.5$  Hz, 0.7H, minor), 5.05 (t,  $J = 7.3$  Hz, 1H, major), 3.82 (s, 2.2H, minor), 3.79 (s, 3H, major), 2.24-2.19 (m, 1.5H, minor), 2.15-2.11 (s + m, 3H + 1.9H, major + minor), 1.78 (s, 2.1H, minor), 1.48-1.32 (m, 4H + 3.1H, major + minor), 0.94-0.90 (m, 3H + 2.2H, major + minor);  $^{13}\text{C}$  NMR (100 MHz,  $\text{CDCl}_3$ , both isomers)  $\delta$  173.6, 168.3, 159.6, 159.3, 134.2, 132.4, 130.8, 130.7, 126.7, 126.6, 125.9, 125.2, 114.1, 113.7, 55.31, 55.26, 31.24, 31.21, 28.0, 27.6, 23.4, 22.5, 22.4, 20.6, 13.94, 13.90; HRMS (ESI) Calcd for  $\text{C}_{15}\text{H}_{22}\text{NO}$   $[\text{M} + \text{H}]^+$  248.1650, found 248.1652.

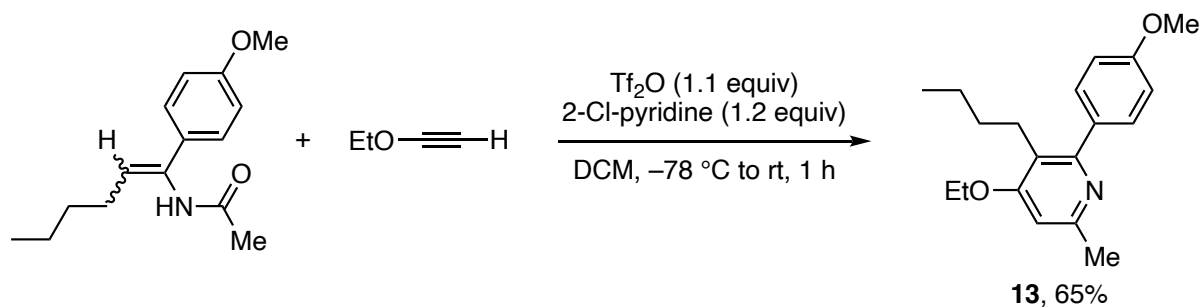

**3-Butyl-4-ethoxy-2-(4-methoxyphenyl)-6-methylpyridine (13):** The reaction between the enamide **9ja** (14.4 mg, 0.081 mmol) and ethyl ethynyl ether (30.6  $\mu\text{L}$ , 0.16 mmol, 50% wt. in hexane) was performed by the same procedure as described for the synthesis of **11**. The crude product was purified by flash column chromatography on silica gel (eluent: hexane/EtOAc/ $\text{Et}_3\text{N}$  = 100/30/1) to give the title compound as a yellow liquid (19.6 mg, 81% yield);  $^1\text{H}$  NMR (400 MHz,  $\text{CDCl}_3$ )  $\delta$  7.35 (d,  $J = 8.6$  Hz, 2H), 6.94 (d,  $J = 8.6$  Hz, 2H), 6.58 (s, 1H), 4.09 (q,  $J = 7.0$  Hz, 2H), 3.84 (s, 3H), 2.54-2.50 (m, 2H), 2.51 (s, 3H), 1.45 (t,  $J = 7.2$  Hz, 3H), 1.45-1.38 (m, 2H), 1.28-1.18 (m, 2H), 0.82 (t,  $J = 7.2$  Hz, 3H);  $^{13}\text{C}$  NMR (100 MHz,  $\text{CDCl}_3$ )  $\delta$  163.9, 159.0, 158.7, 156.4, 133.9, 130.0, 121.9, 113.4, 104.6, 63.4, 55.3, 31.9, 25.9, 24.8, 22.7, 14.6, 13.8; HRMS (ESI) Calcd for  $\text{C}_{19}\text{H}_{26}\text{NO}_2$   $[\text{M} + \text{H}]^+$  300.1964, found 300.1962.

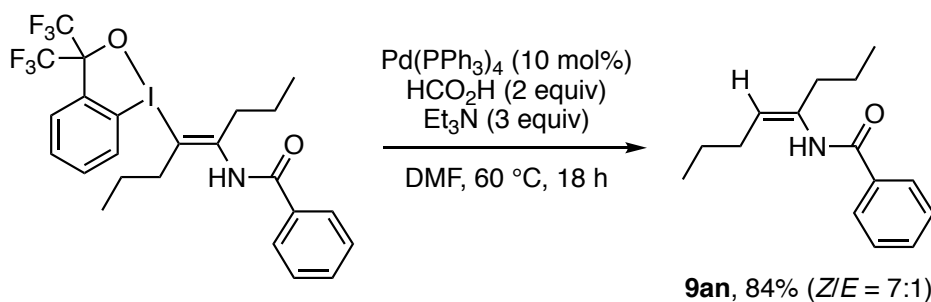

**(Z)-N-(Oct-4-en-4-yl)acetamide (9an):** The hydrodehalogenation of **4an** (59.9 mg, 0.10 mmol) was performed by the same procedure as described for **4aa**. The crude product was purified by flash column chromatography on silica gel (eluent: hexane/EtOAc = 3/1) to afford the title compound as a colorless solid (19.4 mg, 84% yield, *Z/E* = 7:1); <sup>1</sup>H NMR (400 MHz, CDCl<sub>3</sub>) δ 7.82-7.79 (m, 2H, major), 7.77-7.75 (m, 0.3H, minor), 7.54-7.50 (m, 1H + 0.1H, major + minor), 7.47-7.44 (m, 2H + 0.4H, major + minor), 7.12-6.92 (brs, 1H + 0.1H, major + minor), 5.95 (t, *J* = 7.6 Hz, 0.2H, minor), 5.12 (t, *J* = 6.9 Hz, 1H, minor), 2.42 (t, *J* = 7.7 Hz, 2H, major), 2.35 (t, *J* = 7.6 Hz, 0.4H, minor), 2.17-2.06 (m, 0.4H, minor), 2.04-1.98 (m, 2H, major), 1.56-1.38 (m, 4H + 0.7H, major + minor), 1.03-0.88 (m, 6H + 1H, major + minor); <sup>13</sup>C NMR (100 MHz, CDCl<sub>3</sub>, both isomers) δ 166.0, 165.4, 135.5, 134.9, 134.7, 134.1, 131.5, 131.4, 128.64, 128.61, 127.0, 126.8, 123.1, 121.2, 36.9, 31.8, 29.3, 29.1, 23.1, 22.4, 21.2, 20.8, 13.9, 13.8, 13.7, 13.6; HRMS (ESI) Calcd for C<sub>15</sub>H<sub>22</sub>NO [M + H]<sup>+</sup> 232.1701, found 232.1702.

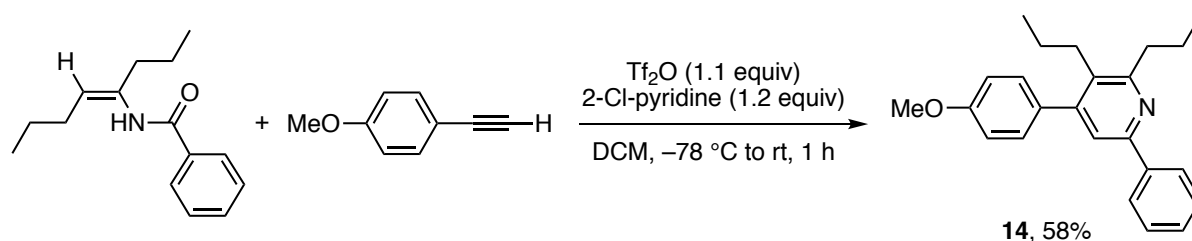

**4-(4-methoxyphenyl)-6-phenyl-2,3-dipropylpyridine (14):** The reaction between the enamide **9an** (19.4 mg, 0.084 mmol) and 4-ethynylanisole (20.7 μL, 0.17 mmol) was performed by the same procedure as described for the synthesis of **11**. The crude product was purified by flash column chromatography on silica gel (eluent: hexane/EtOAc/Et<sub>3</sub>N = 100/3/1) to give the title compound as a yellow liquid (16.9 mg, 58% yield); <sup>1</sup>H NMR (400 MHz, CDCl<sub>3</sub>) δ 8.03-8.00 (m, 2H), 7.42 (t, *J* = 7.8 Hz, 2H), 7.37-7.33 (m, 2H), 7.26-7.23 (m, 2H), 6.98-6.96 (m, 2H), 3.87 (s, 3H), 2.95-2.87 (m, 2H), 2.60-2.56 (m, 2H), 1.97-1.85 (m, 2H), 1.50-1.38 (m,



2H), 1.08 (t,  $J = 7.4$  Hz, 3H), 0.83 (t,  $J = 7.4$  Hz, 3H);  $^{13}\text{C}$  NMR (100 MHz,  $\text{CDCl}_3$ )  $\delta$  160.5, 159.0, 153.3, 150.3, 139.8, 133.1, 132.0, 129.7, 128.5, 128.3, 127.6, 119.5, 113.6, 55.3, 37.2, 30.8, 24.1, 22.9, 14.1; HRMS (ESI) Calcd for  $\text{C}_{24}\text{H}_{28}\text{NO}$   $[\text{M} + \text{H}]^+$  346.2171, found 346.2179.

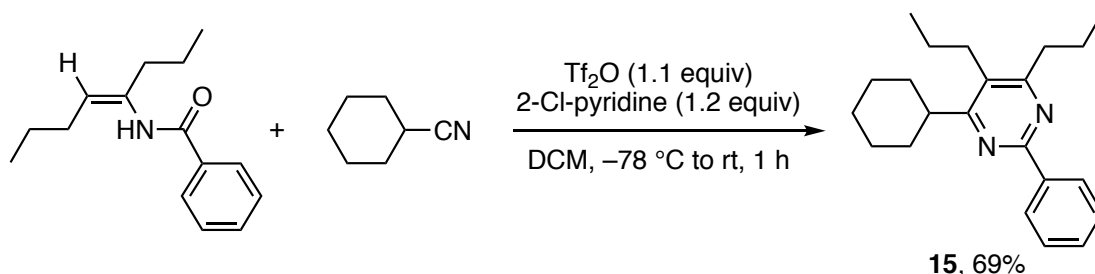

**4-cyclohexyl-2-phenyl-5,6-dipropylpyrimidine (15):** The pyrimidine synthesis was performed according to the literature procedure.<sup>8</sup> Under  $\text{N}_2$  gas, a 10 mL Schlenk tube equipped with a stir bar was charged sequentially with the enamide **9an** (19.0 mg, 0.082 mmol), cyclohexanecarbonitrile (10.7  $\mu\text{L}$ , 0.16 mmol), 2-chloropyridine (9.3  $\mu\text{L}$ , 0.09 mmol) and DCM (0.5 mL). Then the trifluoromethanesulfonic anhydride ( $\text{Tf}_2\text{O}$ , 15.3  $\mu\text{L}$ , 0.09 mmol) was added dropwise via syringe at  $-78$   $^\circ\text{C}$ . After 5 min, the reaction mixture was placed in an ice-water bath and warmed to  $0$   $^\circ\text{C}$  for 5 min. The resulting solution was allowed to warm to ambient temperature. After 1 h, triethylamine (80  $\mu\text{L}$ ) was introduced to neutralize the trifluoromethanesulfonate salts. DCM (5 mL) was added to dilute the mixture and the layers were separated. The organic layer was washed with brine (2 mL) and dried over  $\text{MgSO}_4$ . The volatiles were removed under reduced pressure and the residue was purified by flash column chromatography on silica gel (eluent: hexane/ $\text{EtOAc}/\text{Et}_3\text{N} = 100/3/1$ ) to give the title compound as a colorless liquid (16.9 mg, 69% yield);  $^1\text{H}$  NMR (400 MHz,  $\text{CDCl}_3$ )  $\delta$  8.50-8.47 (m, 2H), 7.47-7.39 (m, 1H), 2.89-2.82 (m, 1H), 2.80-2.75 (m, 2H), 2.64-2.60 (m, 2H), 1.91-1.81 (m, 6H), 1.79-1.72 (m, 3H), 1.56-1.48 (m, 2H), 1.44-1.38 (m, 3H), 1.07-1.03 (m, 5H);  $^{13}\text{C}$  NMR (100 MHz,  $\text{CDCl}_3$ )  $\delta$  171.6, 167.9, 160.8, 138.9, 129.6, 128.2, 127.9, 127.4, 41.6, 36.7, 32.2, 29.0, 26.6, 26.0, 24.2, 22.0, 14.5, 14.3; HRMS (ESI) Calcd for  $\text{C}_{22}\text{H}_{31}\text{N}_2$   $[\text{M} + \text{H}]^+$  323.2487, found 323.2471.

## DFT Calculations

All the density functional theory (DFT) calculations were carried out using Gaussian 16 program.<sup>9</sup> Geometry optimizations were performed with the M06-2X functional<sup>10</sup> and a combined basis set B1 (i.e. the SDD effective core potential<sup>11</sup> for iodine, the 6-31G(d) basis set for all other atoms). Harmonic frequency calculations were performed for each stationary point to ensure that it is either an energy minimum (no imaginary frequency) or a transition state (only one imaginary frequency). For each transition state, intrinsic reaction coordinate (IRC)<sup>12</sup> analysis was performed to ensure that it connects the correct reactant and product. The single-point energy calculations were further performed with the M06-2X functional and a combined basis set B2 (i.e. the SDD effective core potential for iodine, the 6-311++G(2df,2p) basis set for all other atoms). The SMD model<sup>13</sup> with 1,1,1,3,3,3-Hexafluoro-2-propanol (HFIP) as the solvent was used for all the calculations. Because HFIP is not a built-in solvent in Gaussian 16, several parameters ( $\epsilon = 16.7$ ,<sup>14</sup>  $\epsilon_{\text{surf}} = 1.63$ ,<sup>15</sup>  $\text{SurfaceTensionAtInterface} = 23.2$ ,<sup>14</sup>  $\text{CarbonAromaticity} = 0$ ,  $\text{ElectronegativeHalogenicity} = 0.6$ ) were used to customize it. The  $\text{HBondAcidity}$  and  $\text{HBondBasicity}$  of HFIP used the values of 2,2,2-trifluoroethanol (TFE) instead because there is no data available and TFE is the closest to HFIP among the built-in solvents in Gaussian 16. The single-point energies corrected by the thermal correction to Gibbs free energies (TCG, obtained from frequency calculations) were used as the Gibbs free energies reported in this work, corresponding to the reference state of 1 mol/L, 298.15 K. The Mayer bond orders and ADCH atomic charges were calculated using Multiwfn 3.8.<sup>16</sup> The 3-D structures were drawn using CYLview software.<sup>17</sup>

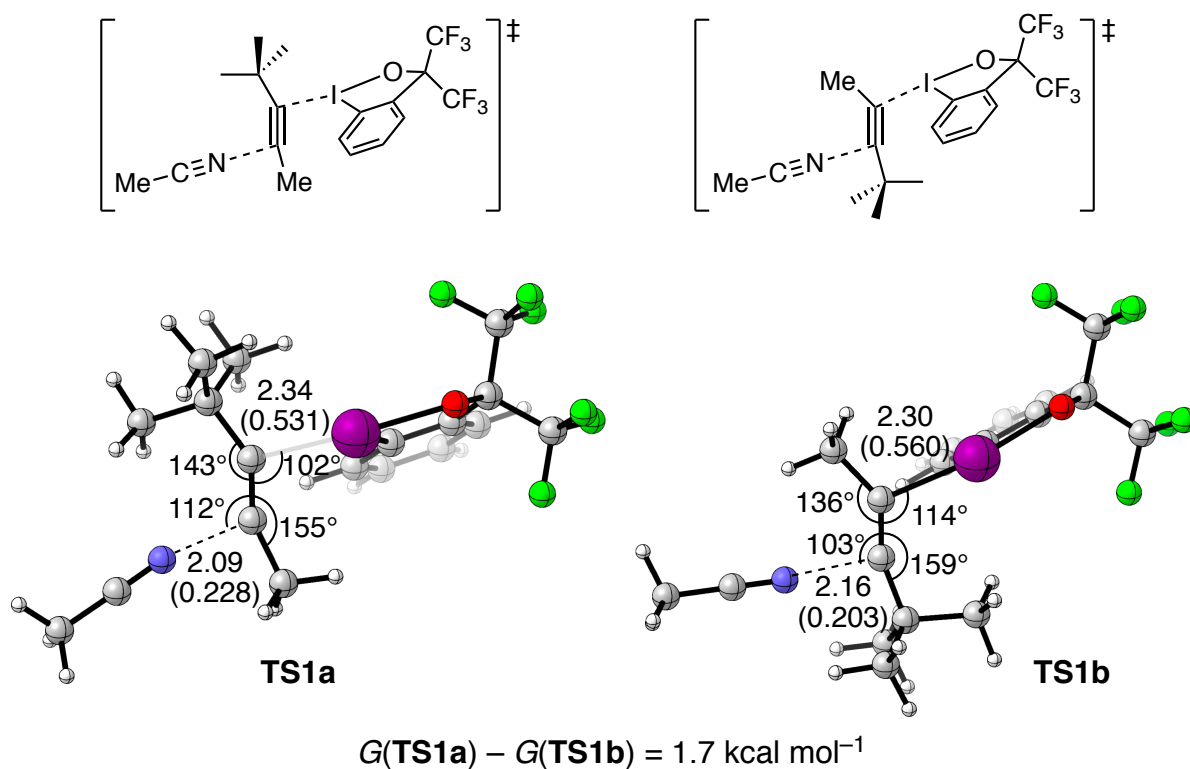

**Figure S4.** Structures of regioisomeric transition states for the addition of MeCN to 4,4-dimethylpent-2-yne activated by  $\text{BX}^+$ . Gibbs free energies were calculated at the SMD(HFIP)-M06-2X/B2//SMD(HFIP)-M06-2X/B1 level. Bond distances are in Å. Mayer bond orders are shown in the parentheses.

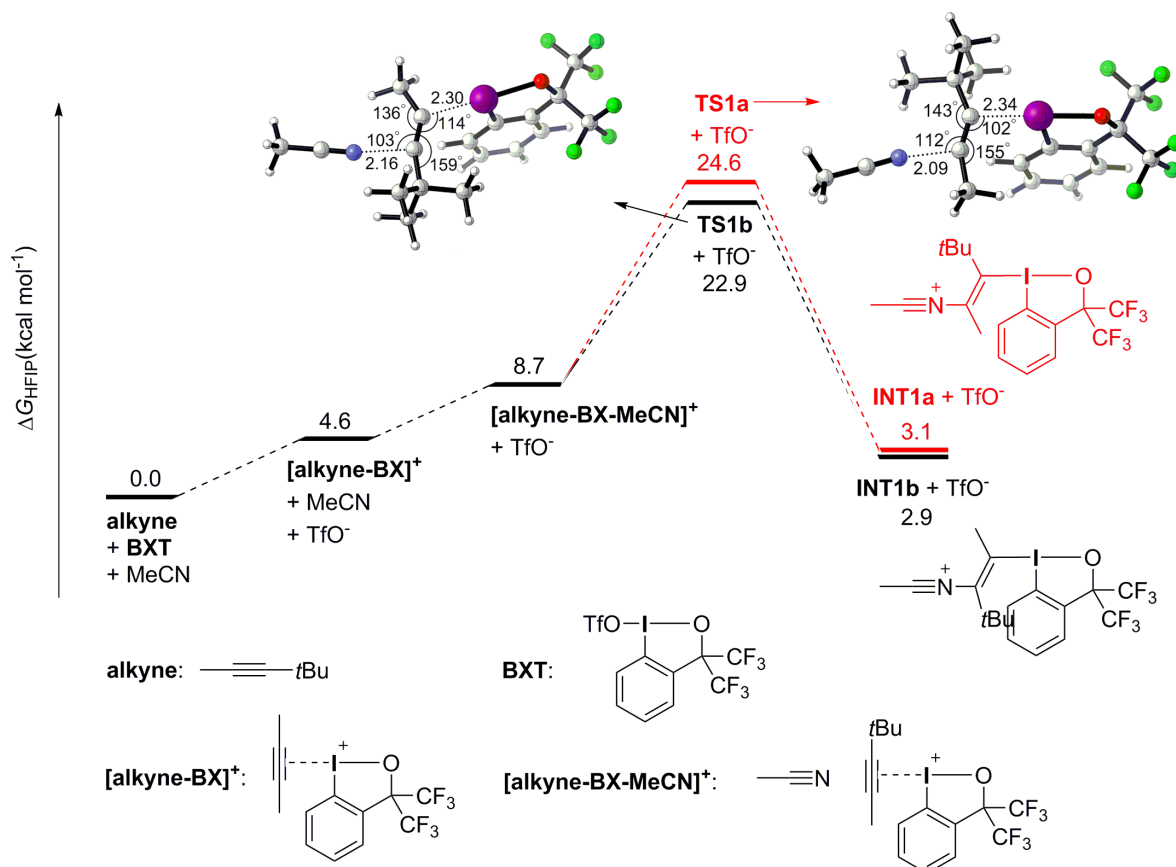

**Figure S5.** Gibbs free energy diagram for the BXT-mediated addition of MeCN to 4,4-dimethylpent-2-yne.

### Thermal correction to Gibbs free energies (TCG), single-point electronic energies (E) and Cartesian coordinates

**alkyne** (4,4-dimethylbut-2-yne)

TCG = 0.137681 a.u.

E = -273.8810416 a.u.

|   |              |              |              |
|---|--------------|--------------|--------------|
| C | 1.786593000  | -0.000010000 | 0.000930000  |
| C | 0.576935000  | -0.000007000 | 0.001211000  |
| C | 3.250783000  | -0.000001000 | 0.000172000  |
| H | 3.641083000  | 0.006924000  | -1.022274000 |
| H | 3.642193000  | 0.881788000  | 0.516914000  |
| H | 3.642203000  | -0.888704000 | 0.504923000  |
| C | -0.900247000 | -0.000001000 | 0.000063000  |
| C | -1.409854000 | -0.000501000 | 1.449411000  |
| C | -1.407375000 | 1.256067000  | -0.724973000 |
| C | -1.407396000 | -1.255555000 | -0.725848000 |
| H | -1.060676000 | -0.888481000 | 1.986230000  |
| H | -1.060726000 | 0.887139000  | 1.986823000  |
| H | -2.505684000 | -0.000536000 | 1.456674000  |
| H | -1.056213000 | 1.277449000  | -1.761705000 |
| H | -2.503196000 | 1.263663000  | -0.730570000 |

|   |              |              |              |
|---|--------------|--------------|--------------|
| H | -1.058063000 | 2.164508000  | -0.223633000 |
| H | -2.503217000 | -1.263111000 | -0.731469000 |
| H | -1.056214000 | -1.276239000 | -1.762587000 |
| H | -1.058126000 | -2.164349000 | -0.225120000 |

## BXT

TCG = 0.095756 a.u.

E = -1992.470134 a.u.

|   |              |              |              |
|---|--------------|--------------|--------------|
| I | 0.374912000  | -0.814505000 | -0.613220000 |
| O | -1.568458000 | -1.355187000 | -0.307789000 |
| C | -0.466093000 | 1.119513000  | -0.318516000 |
| C | -1.808735000 | 1.040483000  | 0.014984000  |
| C | -2.488500000 | 2.232438000  | 0.272497000  |
| C | -1.814913000 | 3.446621000  | 0.173501000  |
| C | -0.471603000 | 3.485592000  | -0.187088000 |
| C | 0.229349000  | 2.306234000  | -0.441658000 |
| H | 0.045799000  | 4.434896000  | -0.277029000 |
| H | 1.269545000  | 2.338240000  | -0.742259000 |
| H | -3.536985000 | 2.216345000  | 0.545835000  |
| H | -2.349813000 | 4.368648000  | 0.374545000  |
| C | -2.447006000 | -0.338371000 | 0.071383000  |
| C | -2.904969000 | -0.662034000 | 1.505077000  |
| C | -3.618452000 | -0.428277000 | -0.924749000 |
| F | -1.860984000 | -0.586427000 | 2.332692000  |
| F | -3.841084000 | 0.190857000  | 1.934120000  |
| F | -3.404800000 | -1.895209000 | 1.583227000  |
| F | -4.121686000 | -1.661768000 | -0.961870000 |
| F | -4.611083000 | 0.410900000  | -0.611516000 |
| F | -3.182890000 | -0.122929000 | -2.148225000 |
| O | 3.968137000  | 1.886599000  | -0.040047000 |
| S | 3.264549000  | 0.648639000  | 0.251986000  |
| O | 2.369286000  | 0.233791000  | -0.911314000 |
| O | 2.593541000  | 0.508896000  | 1.536610000  |
| C | 4.525862000  | -0.675234000 | 0.196994000  |
| F | 5.390671000  | -0.500581000 | 1.185703000  |
| F | 3.929130000  | -1.853247000 | 0.334760000  |
| F | 5.164796000  | -0.639617000 | -0.962941000 |

## MeCN

TCG = 0.023084 a.u.

E = -132.7500944 a.u.

|   |              |              |              |
|---|--------------|--------------|--------------|
| C | 0.000000000  | 0.000000000  | -1.179326000 |
| H | 0.000000000  | 1.028926000  | -1.546349000 |
| H | 0.891076000  | -0.514463000 | -1.546349000 |
| H | -0.891076000 | -0.514463000 | -1.546349000 |
| C | 0.000000000  | 0.000000000  | 0.278832000  |
| N | 0.000000000  | 0.000000000  | 1.434573000  |

## [alkyne-BX]<sup>+</sup>

TCG = 0.241553 a.u.

E = -1304.67904 a.u.

|   |              |              |              |
|---|--------------|--------------|--------------|
| I | 0.809551000  | -0.746899000 | 0.818035000  |
| O | -1.189196000 | -1.205245000 | 0.649282000  |
| C | 0.091521000  | 1.097065000  | 0.006301000  |
| C | -1.255199000 | 1.021763000  | -0.311399000 |
| C | -1.851423000 | 2.146270000  | -0.885913000 |

|   |              |              |              |
|---|--------------|--------------|--------------|
| C | -1.095985000 | 3.294308000  | -1.106284000 |
| C | 0.250906000  | 3.334554000  | -0.760006000 |
| C | 0.870283000  | 2.219580000  | -0.193517000 |
| H | 0.835257000  | 4.232837000  | -0.929224000 |
| H | 1.921362000  | 2.244972000  | 0.067171000  |
| H | -2.899602000 | 2.128570000  | -1.160225000 |
| H | -1.568099000 | 4.163179000  | -1.552038000 |
| C | -1.988028000 | -0.278321000 | -0.020123000 |
| C | -3.180474000 | -0.023529000 | 0.922468000  |
| C | -2.440793000 | -0.944413000 | -1.332202000 |
| F | -2.745856000 | 0.580935000  | 2.029921000  |
| F | -4.111292000 | 0.753124000  | 0.359217000  |
| F | -3.761981000 | -1.168257000 | 1.277545000  |
| F | -3.027676000 | -2.117053000 | -1.095706000 |
| F | -3.300203000 | -0.179235000 | -2.011744000 |
| F | -1.375827000 | -1.164856000 | -2.108104000 |
| C | 3.311487000  | 0.016113000  | 0.324235000  |
| C | 3.068443000  | 0.471562000  | 1.440231000  |
| C | 2.933266000  | 1.099356000  | 2.755247000  |
| H | 3.869162000  | 1.614868000  | 2.991398000  |
| H | 2.118868000  | 1.830177000  | 2.748729000  |
| H | 2.735959000  | 0.348785000  | 3.524797000  |
| C | 3.828245000  | -0.434787000 | -0.988264000 |
| C | 2.975301000  | 0.142806000  | -2.126925000 |
| C | 3.843924000  | -1.968250000 | -1.051686000 |
| H | 2.978166000  | 1.236955000  | -2.108319000 |
| H | 3.396294000  | -0.188914000 | -3.081312000 |
| H | 1.939328000  | -0.208036000 | -2.066930000 |
| H | 4.434692000  | -2.389431000 | -0.232528000 |
| H | 2.829491000  | -2.376332000 | -1.001709000 |
| H | 4.292999000  | -2.276977000 | -2.000773000 |
| C | 5.266593000  | 0.108612000  | -1.082113000 |
| H | 5.277676000  | 1.201282000  | -1.031296000 |
| H | 5.890117000  | -0.290489000 | -0.276799000 |
| H | 5.692836000  | -0.201895000 | -2.041541000 |

## OTf

TCG = -0.00405 a.u.

E = -961.6689107 a.u.

|   |              |              |              |
|---|--------------|--------------|--------------|
| O | 1.223588000  | -0.876823000 | -1.131058000 |
| S | 0.888810000  | 0.000143000  | -0.000067000 |
| O | 1.223788000  | 1.418203000  | -0.193460000 |
| O | 1.223576000  | -0.541667000 | 1.324581000  |
| C | -0.937830000 | 0.000032000  | 0.000008000  |
| F | -1.405878000 | -1.236880000 | 0.168264000  |
| F | -1.405972000 | 0.764189000  | 0.986995000  |
| F | -1.406106000 | 0.472671000  | -1.155202000 |

## [MeCN-alkyne-BX]<sup>+</sup>

TCG = 0.281243 a.u.

E = -1437.43606592 a.u.

|   |              |              |              |
|---|--------------|--------------|--------------|
| I | -0.198120000 | -0.966122000 | -0.853148000 |
| O | 1.857273000  | -1.031443000 | -0.813746000 |
| C | 0.192201000  | 0.838686000  | 0.229074000  |
| C | 1.546514000  | 1.007832000  | 0.465796000  |
| C | 1.941063000  | 2.141059000  | 1.180596000  |
| C | 0.984329000  | 3.053733000  | 1.616848000  |
| C | -0.365930000 | 2.848057000  | 1.351231000  |
| C | -0.784048000 | 1.719279000  | 0.645537000  |
| H | -1.112251000 | 3.559880000  | 1.689195000  |
| H | -1.837190000 | 1.559276000  | 0.448345000  |
| H | 2.989114000  | 2.313605000  | 1.395160000  |
| H | 1.301985000  | 3.932081000  | 2.168464000  |

|   |              |              |              |
|---|--------------|--------------|--------------|
| C | 2.502470000  | -0.051046000 | -0.059320000 |
| C | 3.535561000  | 0.579934000  | -1.012405000 |
| C | 3.190268000  | -0.777399000 | 1.111803000  |
| F | 2.899621000  | 1.233429000  | -1.986804000 |
| F | 4.336139000  | 1.444492000  | -0.380800000 |
| F | 4.301650000  | -0.353411000 | -1.574780000 |
| F | 4.005159000  | -1.735307000 | 0.670379000  |
| F | 3.905863000  | 0.059191000  | 1.868852000  |
| F | 2.262515000  | -1.349043000 | 1.884361000  |
| C | -2.800273000 | -0.805756000 | -0.248083000 |
| C | -2.673492000 | -0.107664000 | -1.252104000 |
| C | -2.675755000 | 0.799701000  | -2.401604000 |
| H | -3.711716000 | 1.042328000  | -2.659044000 |
| H | -2.145753000 | 1.724503000  | -2.151272000 |
| H | -2.199251000 | 0.333944000  | -3.268141000 |
| C | -3.174942000 | -1.565006000 | 0.967714000  |
| C | -2.426719000 | -1.000987000 | 2.184381000  |
| C | -2.867160000 | -3.056957000 | 0.783280000  |
| H | -2.656188000 | 0.059688000  | 2.328967000  |
| H | -2.742592000 | -1.550402000 | 3.076967000  |
| H | -1.342957000 | -1.117295000 | 2.072998000  |
| H | -3.399812000 | -3.462806000 | -0.082293000 |
| H | -1.794664000 | -3.229463000 | 0.648220000  |
| H | -3.192350000 | -3.597277000 | 1.677730000  |
| C | -4.690814000 | -1.366223000 | 1.154475000  |
| H | -4.928379000 | -0.312779000 | 1.329444000  |
| H | -5.247894000 | -1.723134000 | 0.283076000  |
| H | -5.008401000 | -1.941398000 | 2.030385000  |
| N | -3.977034000 | 2.506572000  | 0.572838000  |
| C | -4.850528000 | 2.050393000  | -0.032669000 |
| C | -5.950921000 | 1.469068000  | -0.793165000 |
| H | -6.814337000 | 1.327700000  | -0.138554000 |
| H | -6.223309000 | 2.136304000  | -1.614329000 |
| H | -5.642104000 | 0.500880000  | -1.197525000 |

## TS1a

TCG = 0.282382 a.u.

E = -1437.411951 a.u.

|   |              |              |              |
|---|--------------|--------------|--------------|
| I | 0.290973000  | 0.599873000  | -0.855169000 |
| O | -1.827757000 | 0.629700000  | -1.204995000 |
| C | -0.416060000 | -0.752817000 | 0.653750000  |
| C | -1.797091000 | -0.834169000 | 0.715887000  |
| C | -2.356256000 | -1.670201000 | 1.686136000  |
| C | -1.532294000 | -2.399023000 | 2.538489000  |
| C | -0.148161000 | -2.300273000 | 2.438143000  |
| C | 0.430490000  | -1.463672000 | 1.483717000  |
| H | 0.494120000  | -2.871341000 | 3.100485000  |
| H | 1.508151000  | -1.380734000 | 1.405889000  |
| H | -3.432652000 | -1.754864000 | 1.777692000  |
| H | -1.978641000 | -3.047745000 | 3.284736000  |
| C | -2.614982000 | 0.011103000  | -0.258846000 |
| C | -3.602759000 | -0.875496000 | -1.041407000 |
| C | -3.365151000 | 1.106749000  | 0.522509000  |
| F | -2.936605000 | -1.863401000 | -1.646231000 |
| F | -4.538126000 | -1.428313000 | -0.257701000 |
| F | -4.233050000 | -0.171412000 | -1.982995000 |
| F | -4.061152000 | 1.895233000  | -0.298966000 |
| F | -4.215618000 | 0.605329000  | 1.426775000  |
| F | -2.482117000 | 1.872932000  | 1.173083000  |
| C | 2.494438000  | 0.447215000  | -0.068468000 |
| C | 2.912914000  | -0.600768000 | -0.652609000 |
| C | 2.762584000  | -1.835223000 | -1.430899000 |
| H | 3.094885000  | -2.691979000 | -0.839595000 |
| H | 1.704289000  | -1.971962000 | -1.673883000 |
| H | 3.339450000  | -1.782910000 | -2.357167000 |
| C | 2.916071000  | 1.600058000  | 0.820881000  |
| C | 2.021406000  | 1.629120000  | 2.070256000  |
| C | 2.772211000  | 2.916010000  | 0.040138000  |
| H | 2.151897000  | 0.722304000  | 2.669489000  |
| H | 2.304258000  | 2.490410000  | 2.683904000  |

|   |             |              |              |
|---|-------------|--------------|--------------|
| H | 0.961415000 | 1.729663000  | 1.814806000  |
| H | 3.361619000 | 2.890829000  | -0.882153000 |
| H | 1.729854000 | 3.130997000  | -0.214256000 |
| H | 3.140664000 | 3.736894000  | 0.663757000  |
| C | 4.374167000 | 1.445477000  | 1.264185000  |
| H | 4.539373000 | 0.498409000  | 1.785097000  |
| H | 5.061529000 | 1.509670000  | 0.417388000  |
| H | 4.604328000 | 2.263650000  | 1.954661000  |
| N | 4.966651000 | -0.885567000 | -0.387651000 |
| C | 6.080336000 | -1.167667000 | -0.485932000 |
| C | 7.490156000 | -1.509171000 | -0.592976000 |
| H | 8.083672000 | -0.592172000 | -0.578585000 |
| H | 7.771458000 | -2.142943000 | 0.251154000  |
| H | 7.662155000 | -2.044889000 | -1.529370000 |

### TS1b

TCG = 0.280977 a.u.

E = -1437.413296 a.u.

|   |              |              |              |
|---|--------------|--------------|--------------|
| I | -0.199116000 | 0.269543000  | -1.134332000 |
| O | 1.935750000  | 0.507895000  | -1.274844000 |
| C | 0.464555000  | -0.766338000 | 0.622787000  |
| C | 1.834261000  | -0.707457000 | 0.814261000  |
| C | 2.361196000  | -1.340480000 | 1.943560000  |
| C | 1.518725000  | -2.011480000 | 2.824765000  |
| C | 0.146796000  | -2.052938000 | 2.596744000  |
| C | -0.400898000 | -1.420465000 | 1.480571000  |
| H | -0.510331000 | -2.575051000 | 3.284467000  |
| H | -1.470511000 | -1.446433000 | 1.306970000  |
| H | 3.426942000  | -1.311228000 | 2.137295000  |
| H | 1.940166000  | -2.501992000 | 3.695805000  |
| C | 2.674560000  | 0.069303000  | -0.199708000 |
| C | 3.274613000  | 1.311660000  | 0.484526000  |
| C | 3.783797000  | -0.830117000 | -0.775669000 |
| F | 2.283181000  | 2.082492000  | 0.946066000  |
| F | 4.070151000  | 1.004342000  | 1.516863000  |
| F | 3.989705000  | 2.038603000  | -0.376612000 |
| F | 4.454486000  | -0.202874000 | -1.743291000 |
| F | 4.674845000  | -1.213678000 | 0.148965000  |
| F | 3.238942000  | -1.930376000 | -1.303016000 |
| C | -2.338321000 | -0.459412000 | -0.733883000 |
| C | -3.040650000 | 0.366322000  | -0.066518000 |
| N | -5.009875000 | -0.517076000 | -0.135429000 |
| C | -6.031360000 | -1.017696000 | -0.326149000 |
| C | -7.321441000 | -1.648244000 | -0.560867000 |
| H | -7.920382000 | -1.009323000 | -1.213890000 |
| H | -7.166273000 | -2.619205000 | -1.036810000 |
| H | -7.835257000 | -1.783869000 | 0.393536000  |
| C | -2.563488000 | -1.780602000 | -1.389242000 |
| H | -2.484485000 | -1.671033000 | -2.475060000 |
| H | -1.791019000 | -2.486151000 | -1.067002000 |
| H | -3.548190000 | -2.171993000 | -1.129924000 |
| C | -3.365976000 | 1.527995000  | 0.775756000  |
| C | -2.048087000 | 2.320634000  | 0.962681000  |
| C | -4.400353000 | 2.437463000  | 0.099518000  |
| C | -3.850698000 | 1.061660000  | 2.157745000  |
| H | -1.264722000 | 1.701983000  | 1.411252000  |
| H | -1.689572000 | 2.732139000  | 0.016300000  |
| H | -2.270375000 | 3.148644000  | 1.641922000  |
| H | -5.368709000 | 1.939403000  | 0.012469000  |
| H | -4.525433000 | 3.335056000  | 0.712844000  |
| H | -4.065029000 | 2.740339000  | -0.896982000 |
| H | -4.001693000 | 1.945799000  | 2.784680000  |
| H | -4.796735000 | 0.520662000  | 2.084807000  |
| H | -3.107321000 | 0.417421000  | 2.637609000  |

### INT1a

TCG = 0.28849 a.u.

E = -1437.452246 a.u.

|   |              |              |              |
|---|--------------|--------------|--------------|
| I | -0.410135000 | -0.697871000 | -0.786755000 |
| O | 1.859737000  | -0.759571000 | -1.158672000 |



|   |              |              |              |
|---|--------------|--------------|--------------|
| C | 0.384186000  | 0.806523000  | 0.535694000  |
| C | 1.765414000  | 0.877566000  | 0.607074000  |
| C | 2.317355000  | 1.817831000  | 1.484012000  |
| C | 1.497126000  | 2.656630000  | 2.231759000  |
| C | 0.113353000  | 2.565623000  | 2.122688000  |
| C | -0.458882000 | 1.626103000  | 1.266564000  |
| H | -0.530569000 | 3.219988000  | 2.701308000  |
| H | -1.537034000 | 1.547679000  | 1.183247000  |
| H | 3.393349000  | 1.898400000  | 1.583038000  |
| H | 1.944888000  | 3.383144000  | 2.901891000  |
| C | 2.608299000  | -0.080522000 | -0.252698000 |
| C | 3.669891000  | 0.715917000  | -1.039589000 |
| C | 3.296506000  | -1.095444000 | 0.682607000  |
| F | 3.080447000  | 1.697129000  | -1.733567000 |
| F | 4.611056000  | 1.278856000  | -0.262749000 |
| F | 4.304587000  | -0.070078000 | -1.913368000 |
| F | 4.057175000  | -1.952827000 | -0.006366000 |
| F | 4.076771000  | -0.524987000 | 1.613199000  |
| F | 2.363523000  | -1.810578000 | 1.326365000  |
| C | -2.492899000 | -0.370589000 | -0.146467000 |
| C | -3.113855000 | 0.654275000  | -0.752209000 |
| C | -2.576680000 | 1.721649000  | -1.670984000 |
| H | -2.897975000 | 2.703059000  | -1.308992000 |
| H | -1.489283000 | 1.708377000  | -1.710999000 |
| H | -2.975325000 | 1.581586000  | -2.681159000 |
| C | -3.016338000 | -1.424154000 | 0.824171000  |
| C | -2.135197000 | -1.423474000 | 2.088917000  |
| C | -2.941404000 | -2.805095000 | 0.144122000  |
| H | -2.197287000 | -0.463812000 | 2.612493000  |
| H | -2.495086000 | -2.205132000 | 2.765629000  |
| H | -1.084076000 | -1.633421000 | 1.869745000  |
| H | -3.521729000 | -2.815022000 | -0.784644000 |
| H | -1.912978000 | -3.102714000 | -0.082240000 |
| H | -3.361332000 | -3.556060000 | 0.821381000  |
| C | -4.466336000 | -1.207544000 | 1.285649000  |
| H | -4.608378000 | -0.228827000 | 1.754611000  |
| H | -5.185105000 | -1.336047000 | 0.471568000  |
| H | -4.691013000 | -1.968873000 | 2.038936000  |
| N | -4.493973000 | 0.865880000  | -0.563349000 |
| C | -5.602508000 | 1.159518000  | -0.522106000 |
| C | -7.005009000 | 1.479943000  | -0.427417000 |
| H | -7.460096000 | 0.804059000  | 0.303251000  |
| H | -7.108572000 | 2.518384000  | -0.100781000 |
| H | -7.465478000 | 1.341653000  | -1.409784000 |

## INT1b

TCG = 0.288337 a.u.

E = -1437.452445 a.u.

|   |              |              |              |
|---|--------------|--------------|--------------|
| I | 0.296049000  | -0.396841000 | -1.158537000 |
| O | -1.961349000 | -0.723813000 | -1.188147000 |
| C | -0.430865000 | 0.899822000  | 0.397882000  |
| C | -1.789807000 | 0.830029000  | 0.650645000  |
| C | -2.299393000 | 1.641043000  | 1.670943000  |
| C | -1.460022000 | 2.488931000  | 2.386312000  |
| C | -0.098668000 | 2.533061000  | 2.102992000  |
| C | 0.432509000  | 1.726234000  | 1.097981000  |
| H | 0.560143000  | 3.191513000  | 2.659857000  |
| H | 1.495092000  | 1.755292000  | 0.883051000  |
| H | -3.355662000 | 1.611083000  | 1.910062000  |
| H | -1.874204000 | 3.113648000  | 3.170866000  |
| C | -2.650048000 | -0.147365000 | -0.168998000 |
| C | -3.151113000 | -1.262293000 | 0.770702000  |
| C | -3.845359000 | 0.603116000  | -0.789356000 |
| F | -2.099893000 | -1.927376000 | 1.268772000  |
| F | -3.869400000 | -0.809242000 | 1.809514000  |
| F | -3.912387000 | -2.143330000 | 0.113527000  |
| F | -4.531130000 | -0.190069000 | -1.616736000 |
| F | -4.717115000 | 1.072983000  | 0.118451000  |
| F | -3.403549000 | 1.645767000  | -1.502972000 |
| C | 2.340285000  | 0.344480000  | -0.902714000 |

|   |             |              |              |
|---|-------------|--------------|--------------|
| C | 3.278794000 | -0.196496000 | -0.109062000 |
| N | 4.554707000 | 0.403845000  | -0.244292000 |
| C | 5.611957000 | 0.843184000  | -0.321126000 |
| C | 6.939354000 | 1.401182000  | -0.420115000 |
| H | 7.591079000 | 0.672018000  | -0.909560000 |
| H | 6.886559000 | 2.320115000  | -1.010423000 |
| H | 7.301796000 | 1.618094000  | 0.588728000  |
| C | 2.568824000 | 1.506835000  | -1.822859000 |
| H | 2.480526000 | 1.175533000  | -2.864135000 |
| H | 1.785202000 | 2.255847000  | -1.660048000 |
| H | 3.539801000 | 1.987686000  | -1.690048000 |
| C | 3.344915000 | -1.299157000 | 0.953623000  |
| C | 2.009435000 | -1.995913000 | 1.207930000  |
| C | 4.367967000 | -2.355654000 | 0.502559000  |
| C | 3.805113000 | -0.655425000 | 2.275012000  |
| H | 1.231962000 | -1.296258000 | 1.530791000  |
| H | 1.658938000 | -2.551124000 | 0.334972000  |
| H | 2.163947000 | -2.714811000 | 2.018567000  |
| H | 5.374519000 | -1.939647000 | 0.390489000  |
| H | 4.418434000 | -3.146069000 | 1.257938000  |
| H | 4.068466000 | -2.807070000 | -0.448982000 |
| H | 3.855309000 | -1.430627000 | 3.045821000  |
| H | 4.798263000 | -0.202169000 | 2.195934000  |
| H | 3.095079000 | 0.110861000  | 2.604678000  |

## Reference

- (1) Ding, Z.; Yoshikai, N. *Org. Lett.* **2010**, *12*, 4180-4183; (b) Scott, L. T.; Cooney, M. J.; Otte, C.; Puls, C.; Haumann, T.; Boese, R.; Smith, A. B.; Carroll, P. J.; de Meijere, A. *J. Am. Chem. Soc.* **2002**, *116*, 10275-10283.
- (2) Lu, B.; Li, C.; Zhang, L. *J. Am. Chem. Soc.* **2010**, *132*, 14070-14072.
- (3) (a) Pfeifer, L.; Gouverneur, V. *Org. Lett.* **2018**, *20*, 1576-1579; (b) McLaughlin, E. C.; Doyle, M. P. *J. Org. Chem.* **2008**, *73*, 4317-4319.
- (4) (a) Ding, W.; Chai, J.; Wang, C.; Wu, J.; Yoshikai, N. *J. Am. Chem. Soc.* **2020**, *142*, 8619-8624; (b) Chai, J.; Ding, W.; Wu, J.; Yoshikai, N. *Chem. Asian J.* **2020**, *15*, 2166-2169.
- (5) (a) Zhao, T. S.; Yang, Y.; Lessing, T.; Szabo, K. J. *J. Am. Chem. Soc.* **2014**, *136*, 7563-7566; (b) Cao, C.; Li, Y.; Shi, Y.; Odom, A. L. *Chem Commun.* **2004**, *17*, 2002-2003.
- (6) CCDC 2093231 (**4aa**) and 2100970 (**4ia**) provide supplementary crystallographic data for this paper. These data can be obtained free of charge from The Cambridge Crystallographic Data Centre.
- (7) M. Movassaghi, M. D. Hill, O. K. Ahmad, *J. Am. Chem. Soc.* **2007**, *129*, 10096-10097.
- (8) M. Movassaghi, M. D. Hill, *J. Am. Chem. Soc.* **2006**, *128*, 14254-14255.
- (9) M. J. Frisch, G. W. Trucks, H. B. Schlegel, G. E. Scuseria, M. A. Robb, J. R. Cheeseman, G. Scalmani, V. Barone, G. A. Petersson, H. Nakatsuji, X. Li, M. Caricato, A. V. Marenich, J. Bloino, B. G. Janesko, R. Gomperts, B. Mennucci, H. P. Hratchian, J. V. Ortiz, A. F. Izmaylov, J. L. Sonnenberg, D. Williams-Young, F. Ding, F. Lipparini, F. Egidi, J. Goings, B. Peng, A. Petrone, T. Henderson, D. Ranasinghe, V. G. Zakrzewski, J. Gao, N. Rega, G. Zheng, W. Liang, M. Hada, M. Ehara, K. Toyota, R. Fukuda, J. Hasegawa, M. Ishida, T. Nakajima, Y. Honda, O. Kitao, H. Nakai, T. Vreven, K. Throssell, J. A. Montgomery, Jr., J. E. Peralta, F. Ogliaro, M. J. Bearpark, J. J. Heyd, E. N. Brothers, K. N. Kudin, V. N. Staroverov, T. A. Keith, R. Kobayashi, J. Normand, K. Raghavachari, A. P. Rendell, J. C. Burant, S. S. Iyengar, J. Tomasi, M. Cossi, J. M. Millam, M. Klene, C. Adamo, R. Cammi, J. W. Ochterski, R. L. Martin, K. Morokuma, O. Farkas, J. B. Foresman, and D. J. Fox, Gaussian 16 Rev. C.01, Wallingford, CT, **2016**.
- (10) (a) Y. Zhao and D. G. Truhlar, *J. Phys. Chem. A* **2006**, *110*, 13126-13130. (b) Y. Zhao and D. G. Truhlar, *Acc. Chem. Res.* **2008**, *41*, 157-167. (c) Y. Zhao and D. G. Truhlar, *Chem. Phys. Lett.* **2011**, *502*, 1-13.
- (11) M. Dolg, U. Wedig, H. Stoll and H. Preuss, *J. Chem. Phys.* **1987**, *86*, 866.
- (12) K. Fukui, *Acc. Chem. Res.* **1981**, *14*, 363-368.
- (13) A. V. Marenich; C. J. Cramer and D. G. Truhlar, *J. Phys. Chem. B* **2009**, *113*, 6378-

6396.

(14) X. Gu, X. Song, C. Shao, P. Zeng, X. Lu, X. Shen, Q. Yang, *Int. J. Electrochem. Sci.* **2014**, *9*, 8045-8056.

(15) I. Tanabe, Y. Y. Tanaka, K. Watari, T. Hanulia, T. Goto, W. Inami, Y. Kawata, Y. Ozaki, *Sci. Rep.* **2017**, *7*, 5934.

(16) (a) T. Lu, F. Chen, *J. Comput. Chem.* **2012**, *33*, 580–592. (b) I. Mayer, *Chem. Phys. Lett.* **1983**, *97*, 270–274. (c) I. Mayer, *Chem. Phys. Lett.* **2012**, *544*, 83–86. (d) T. Lu, F. Chen, *J. Theor. Comput. Chem.* **2012**, *11*, 163–183.

(17) C. Y. Legault, CYLView, 1.0b; Université de Sherbrooke: Québec, Montreal, Canada, 2009; <http://www.cylview.org>

# NMR Spectra

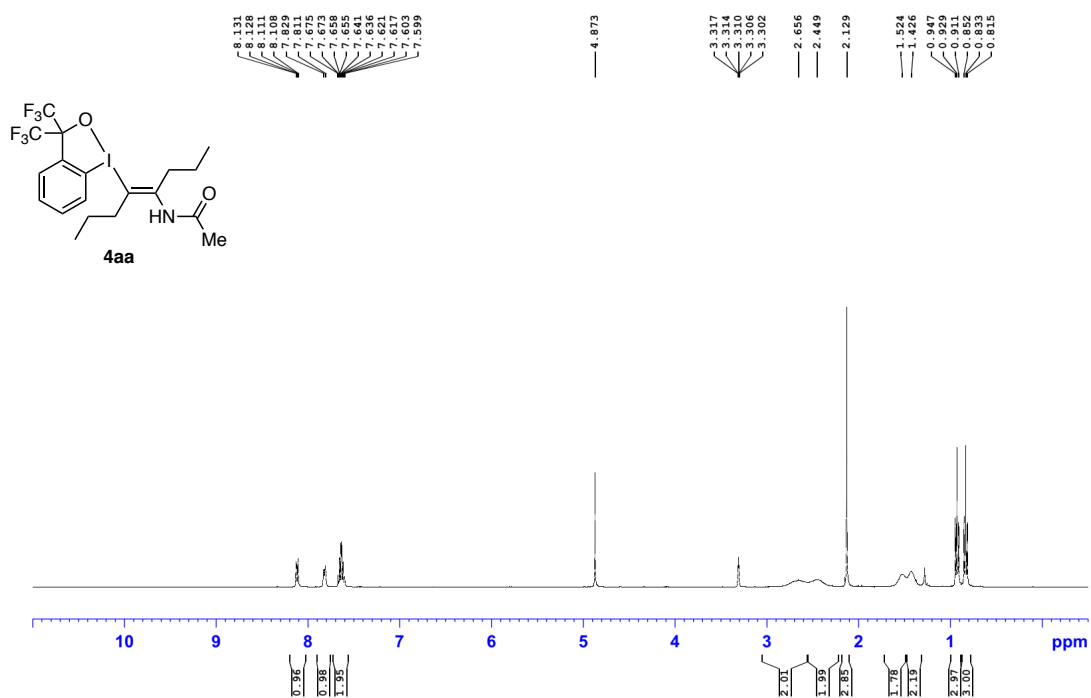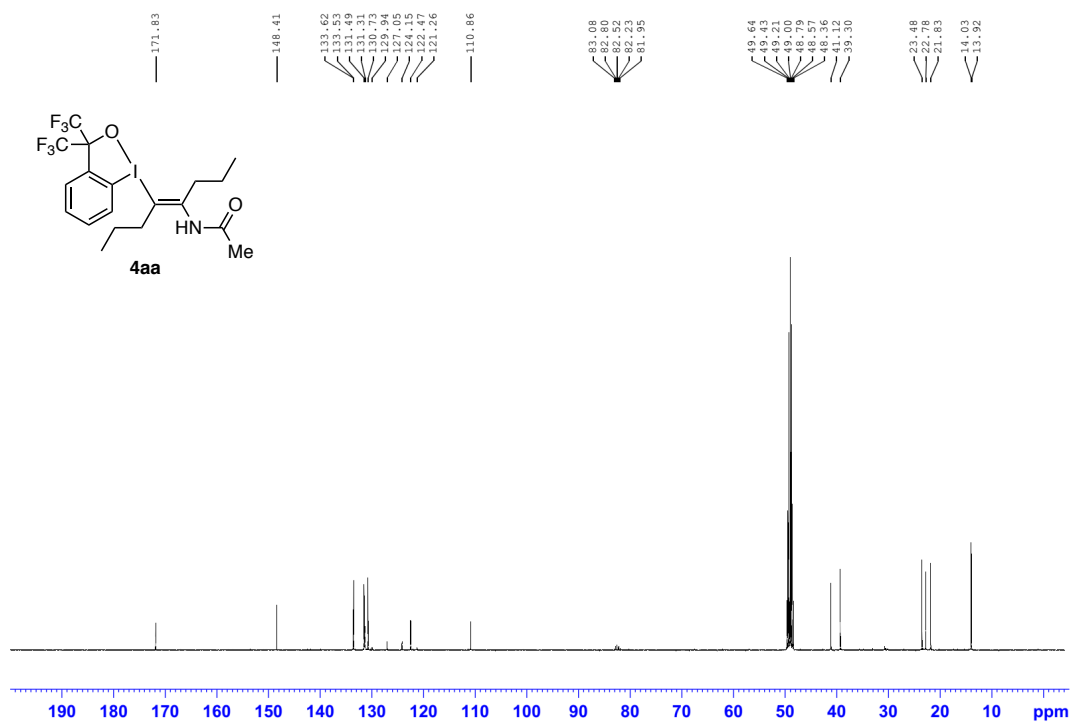

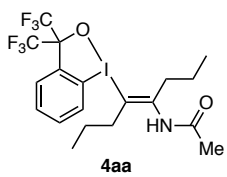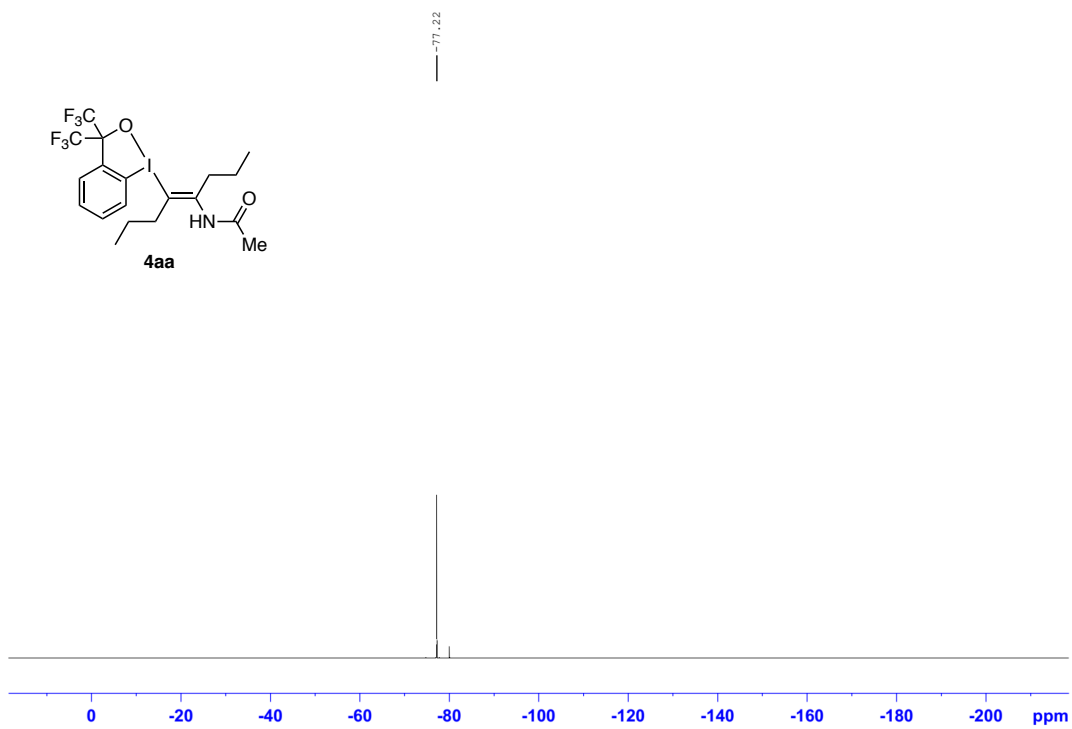

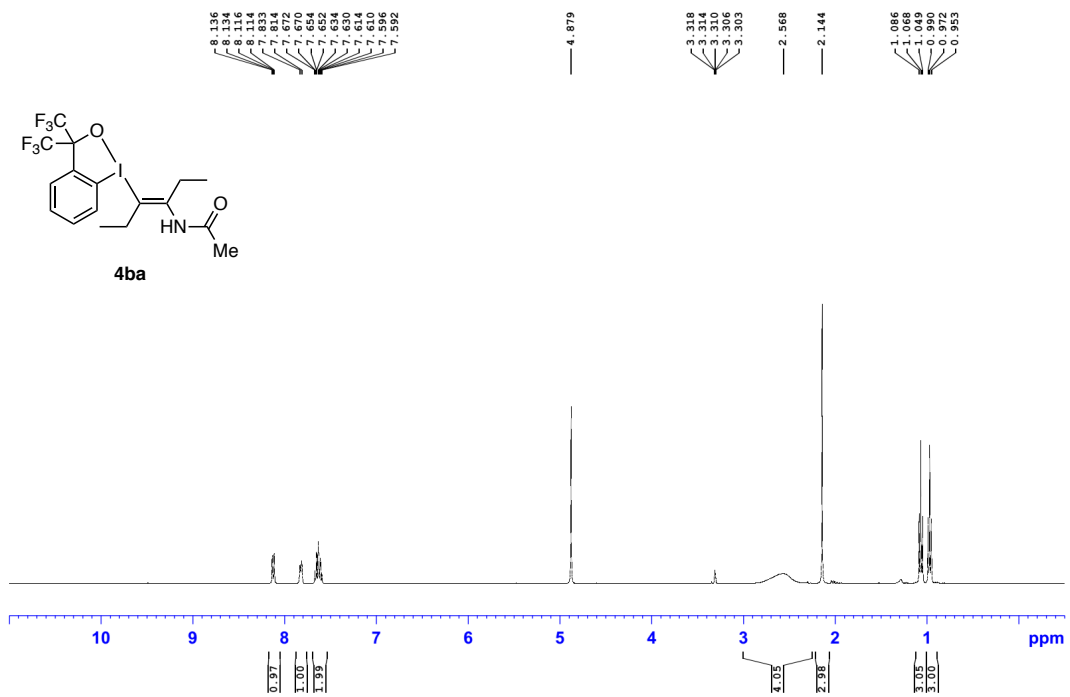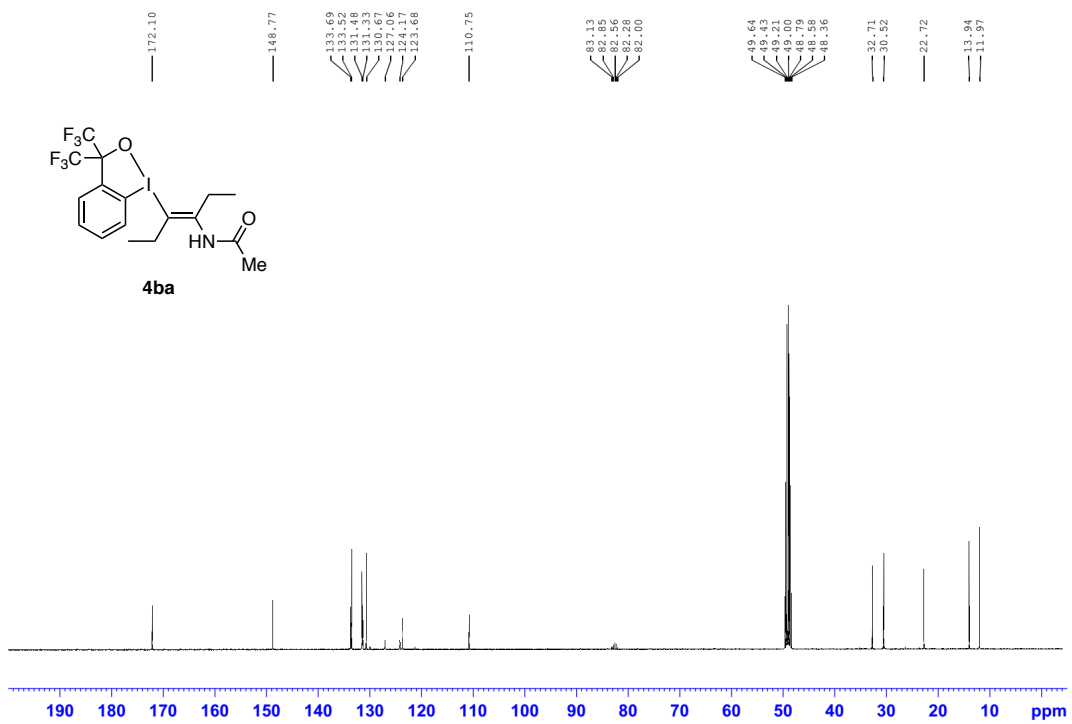

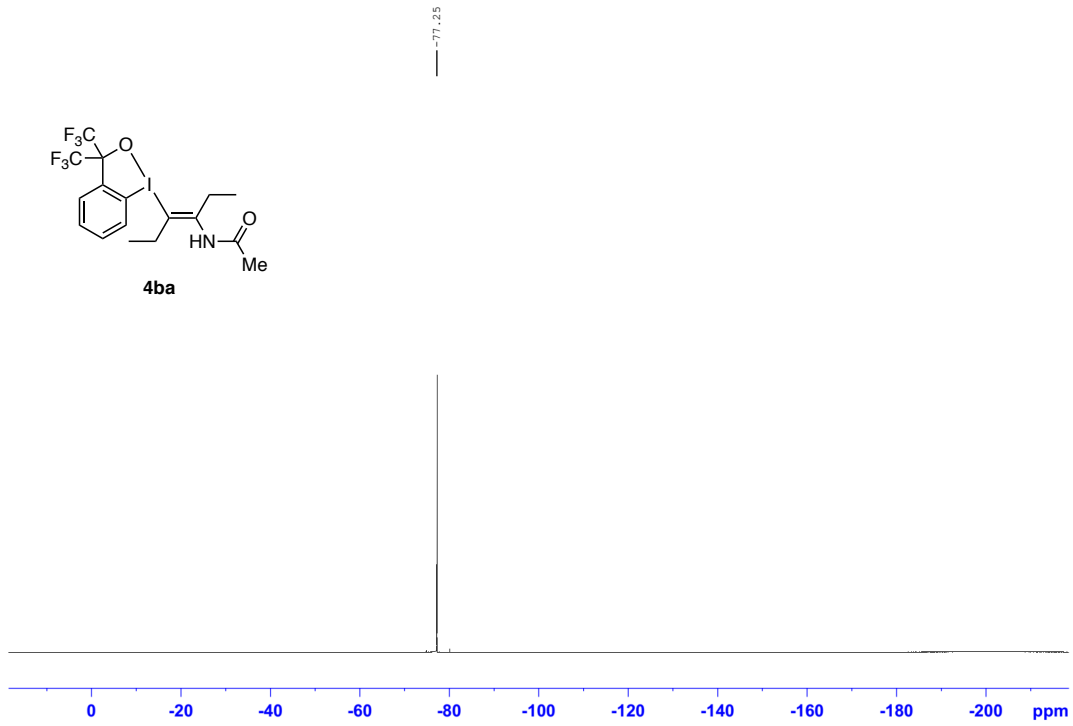



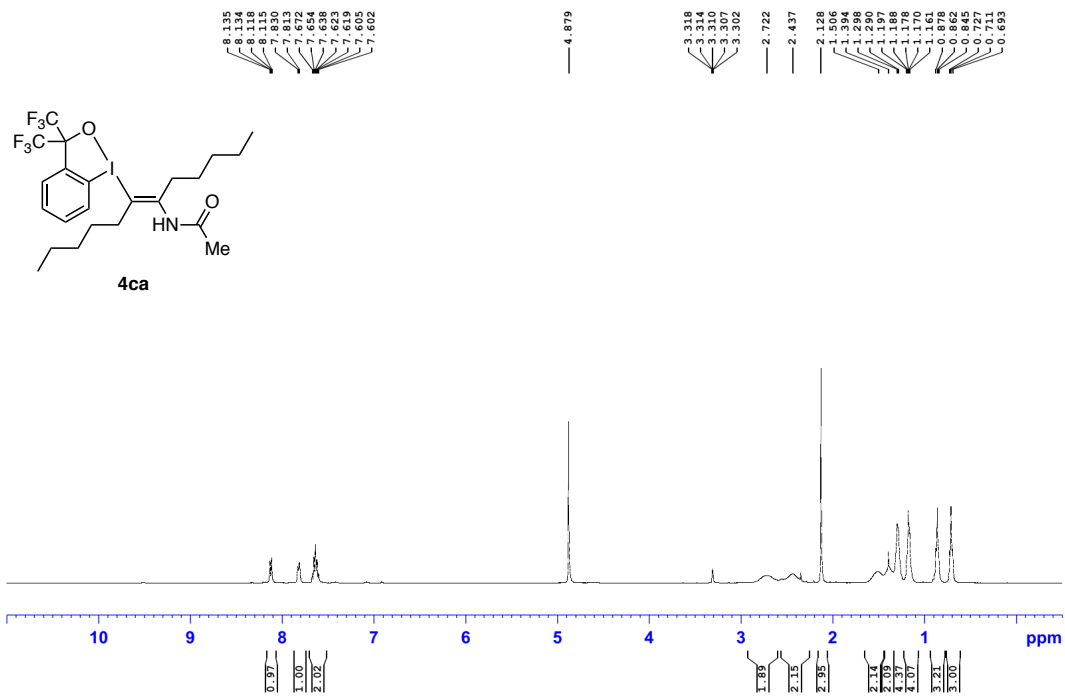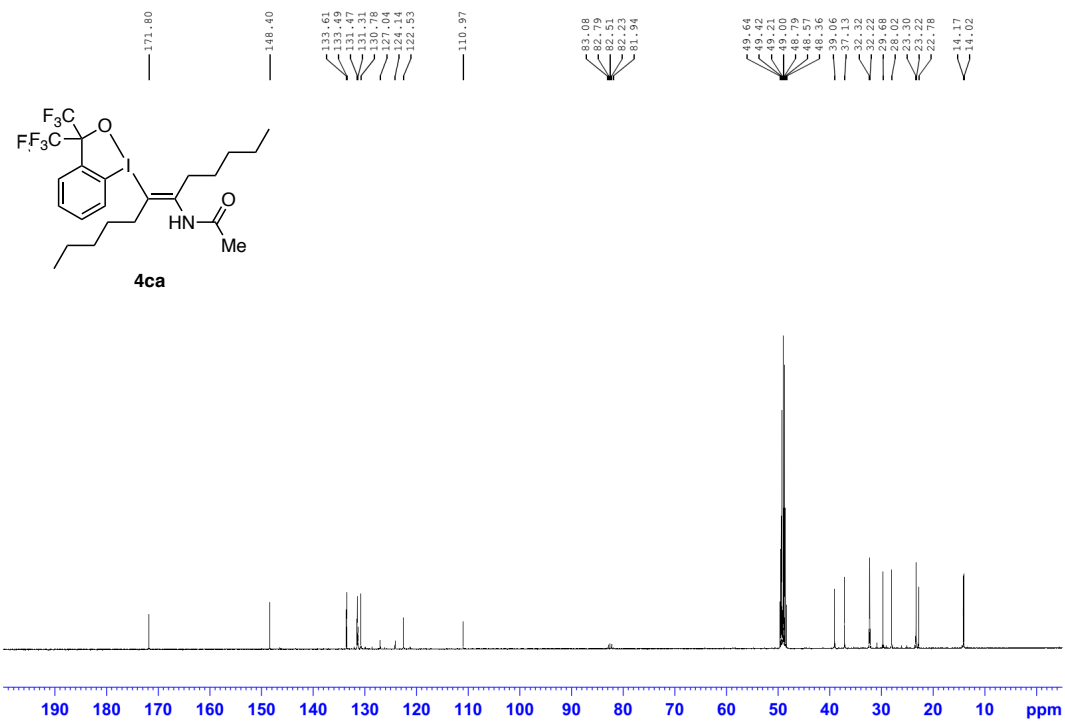

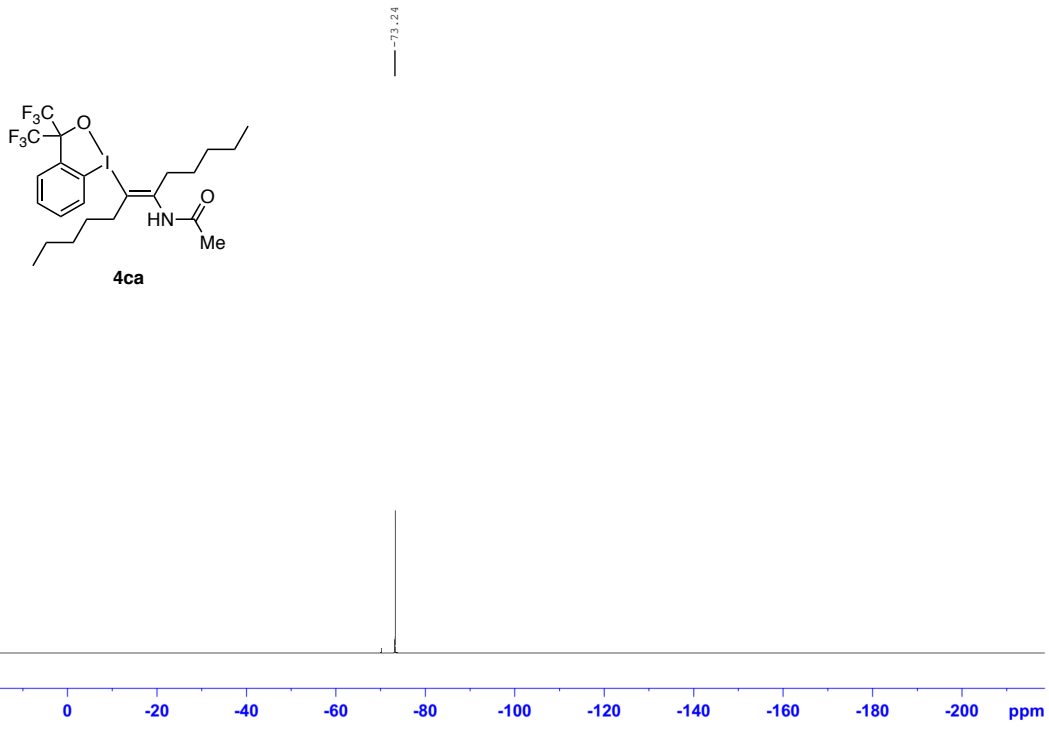

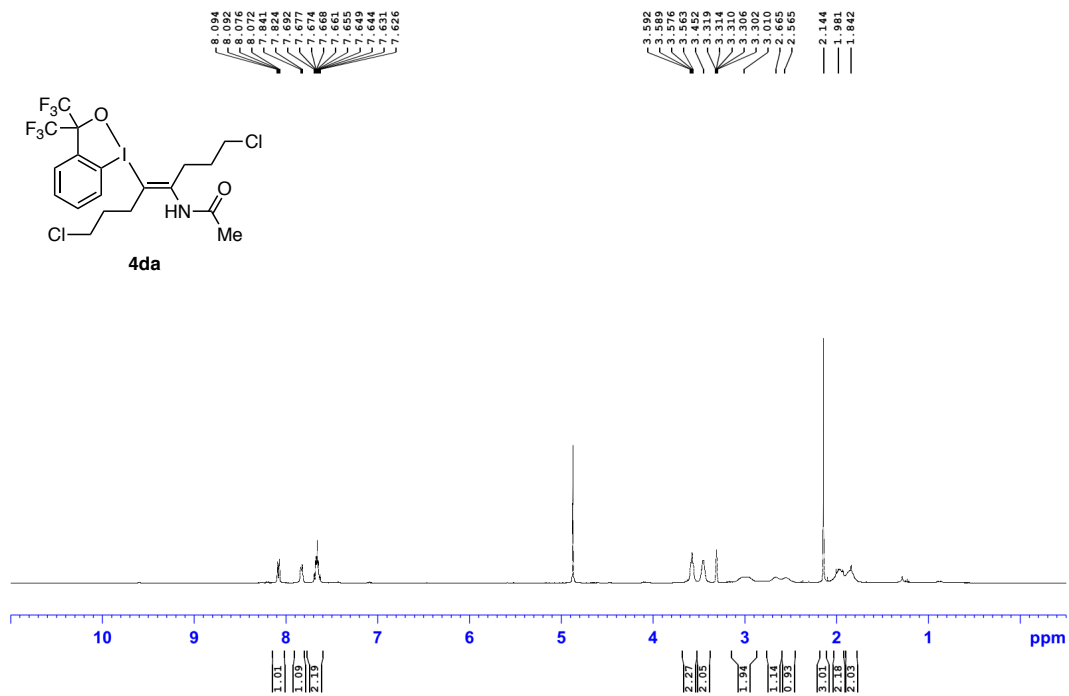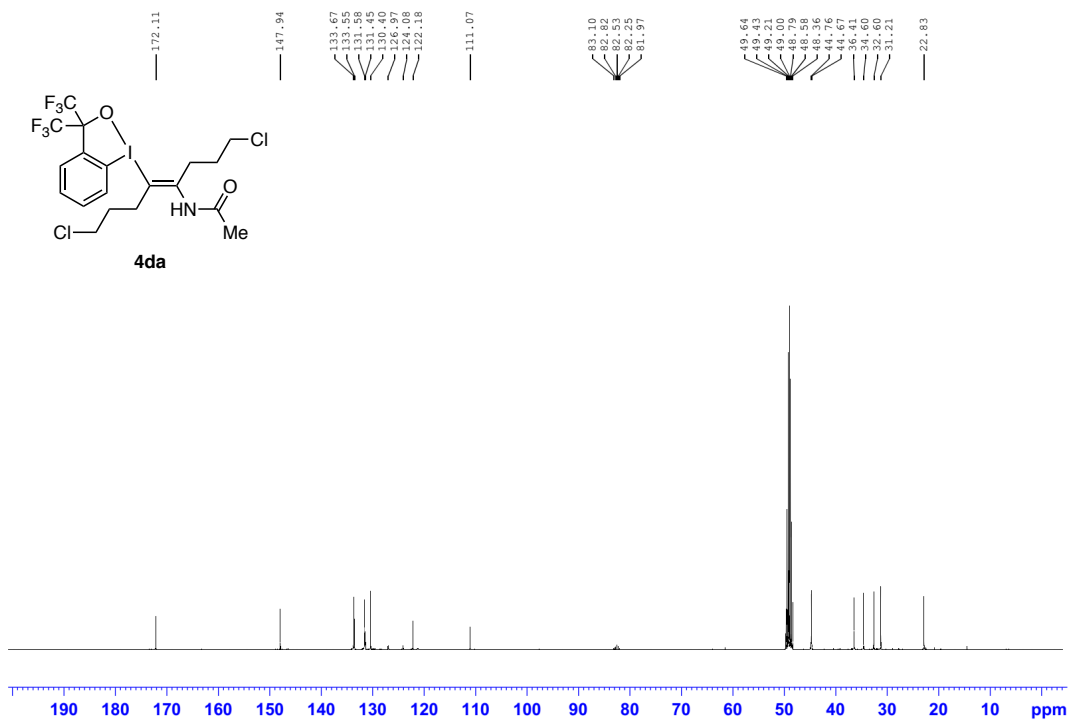

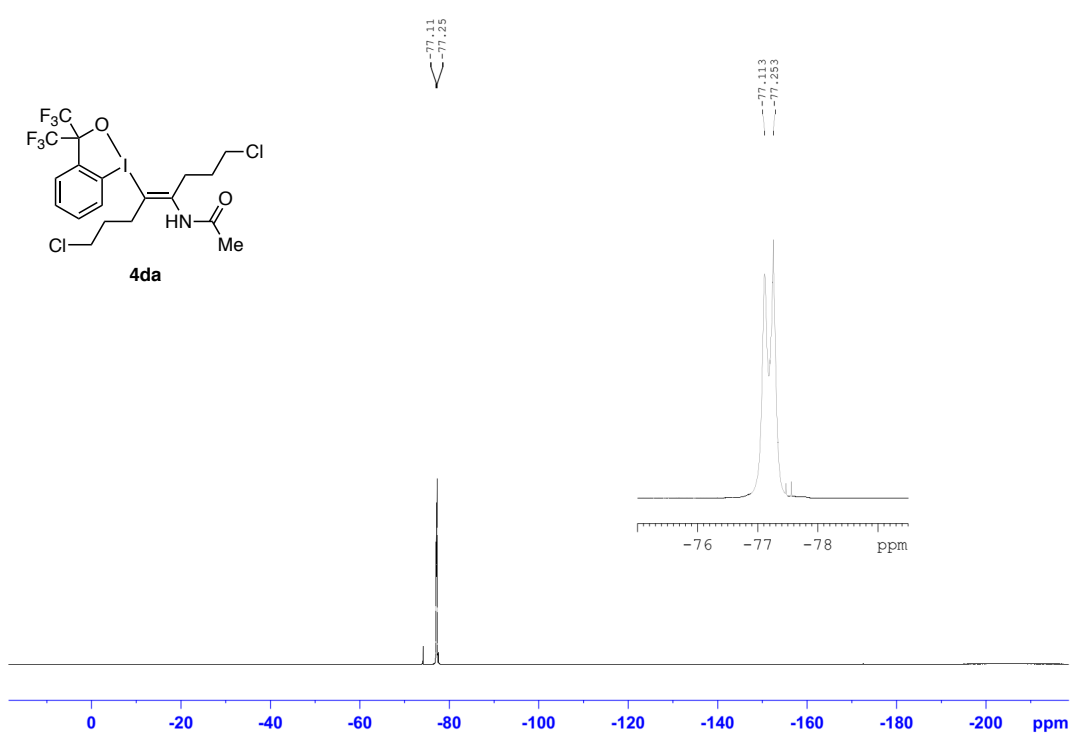

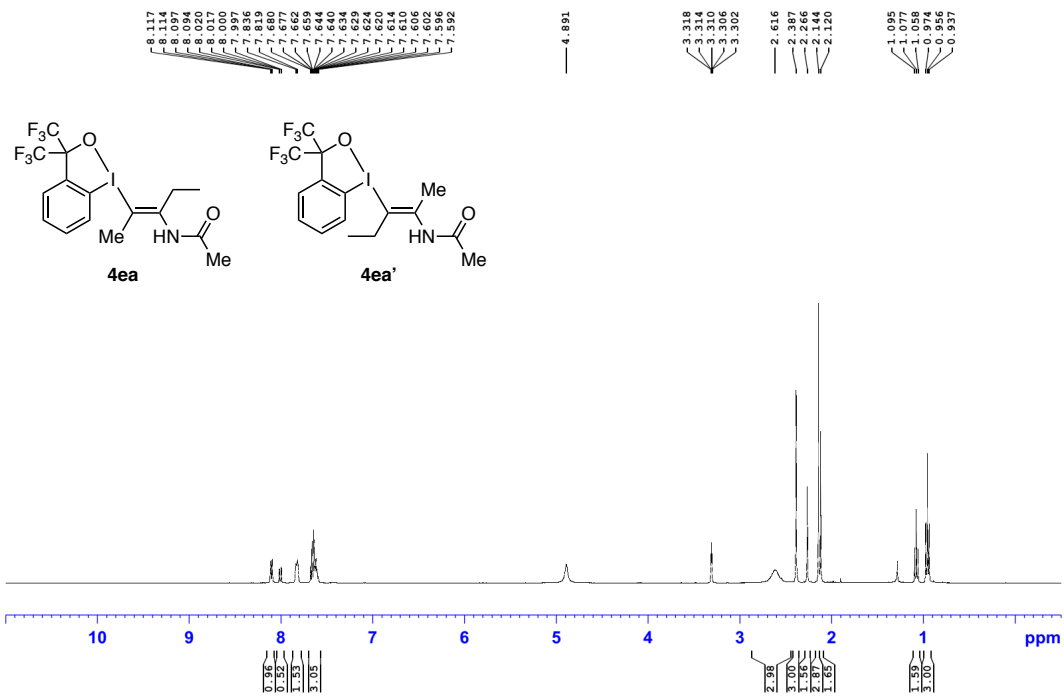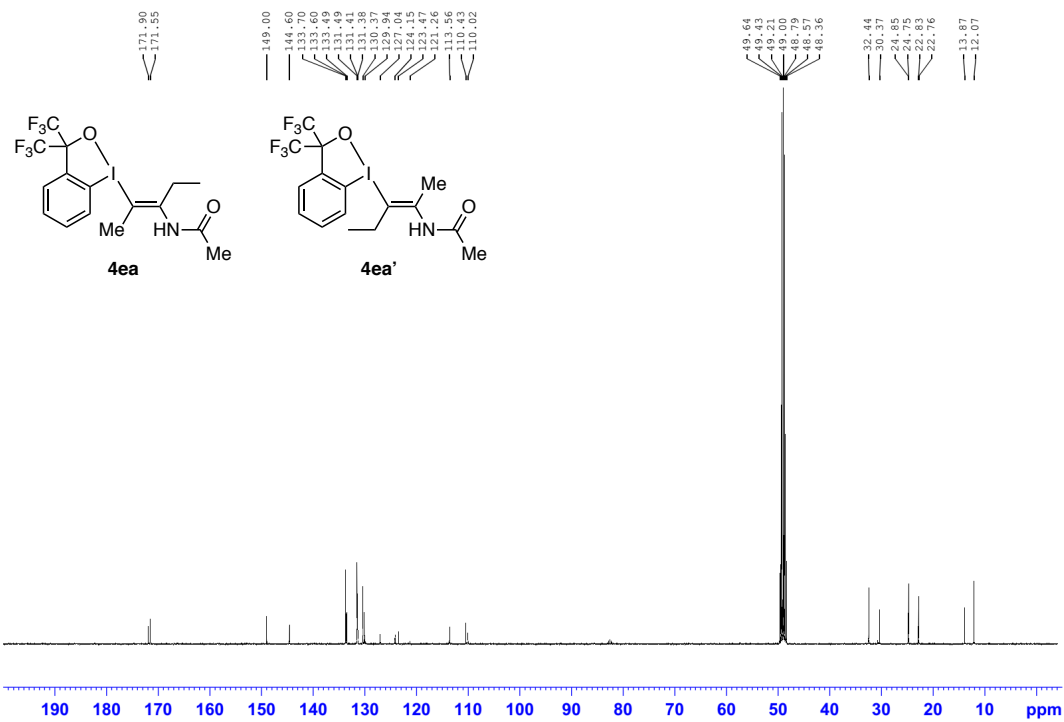

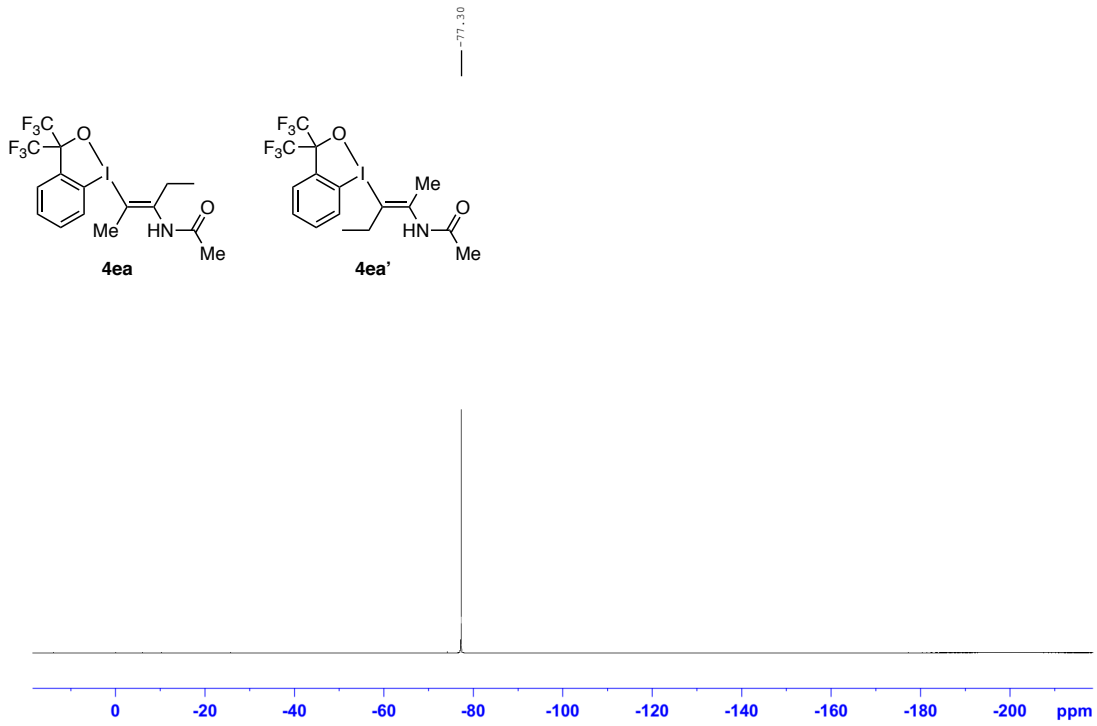

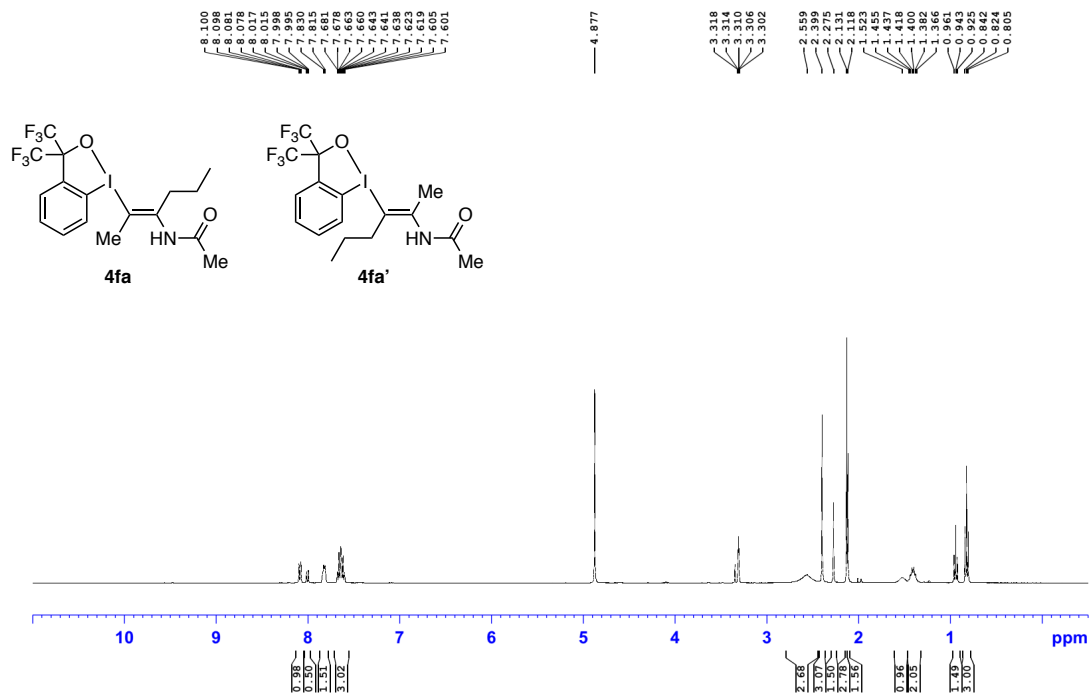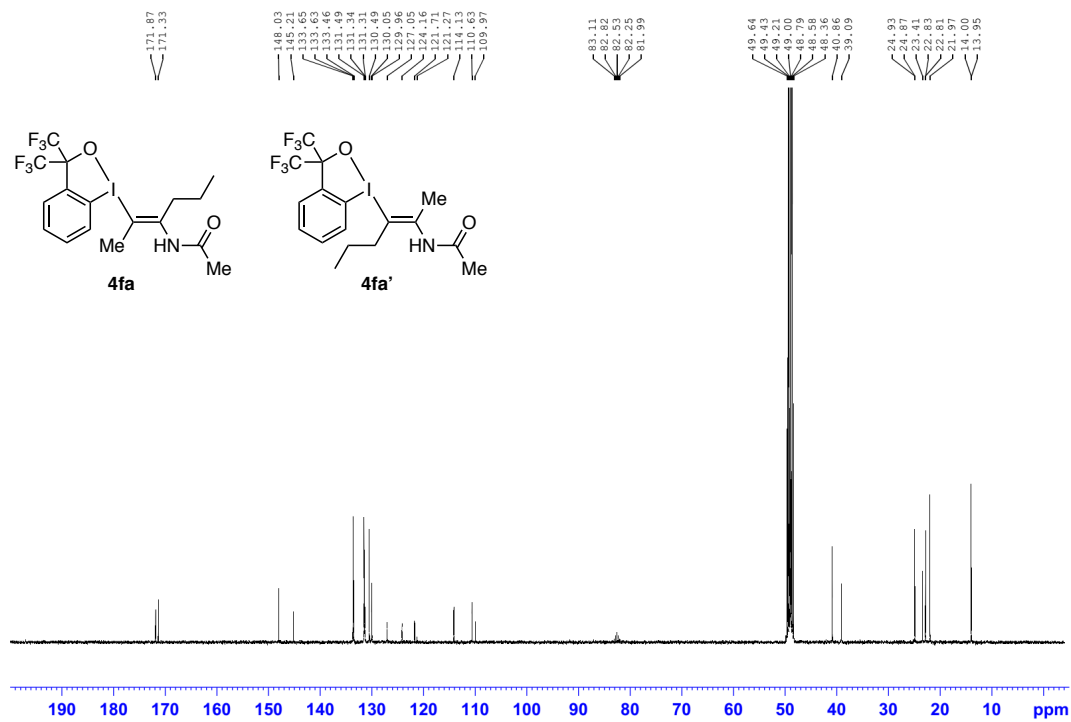

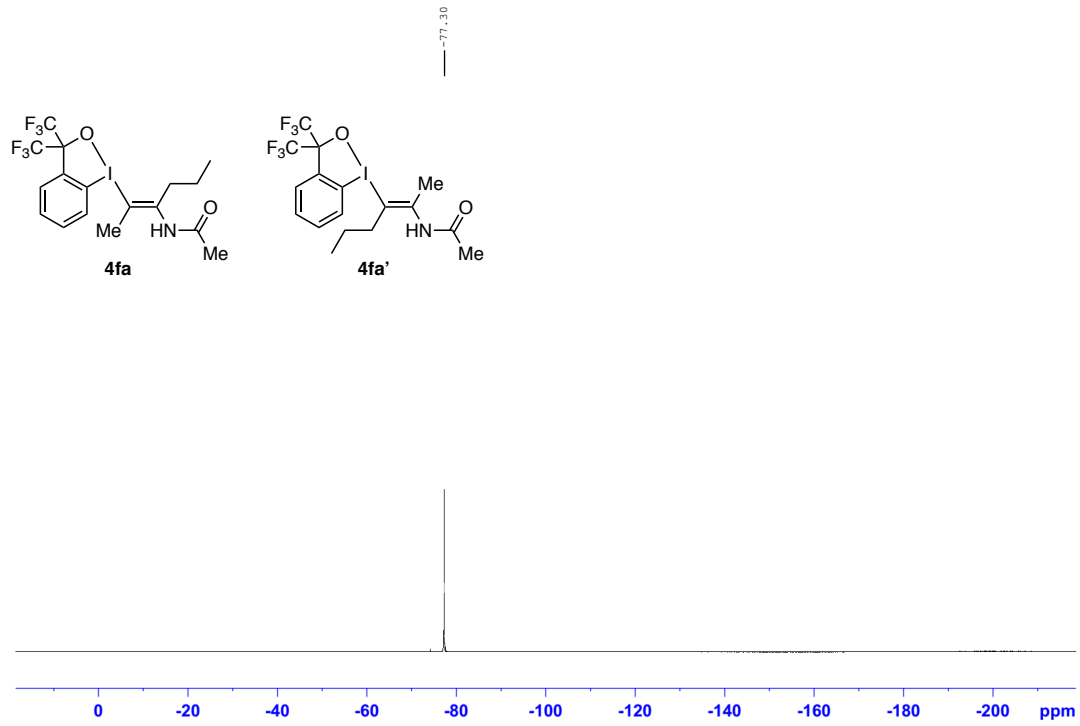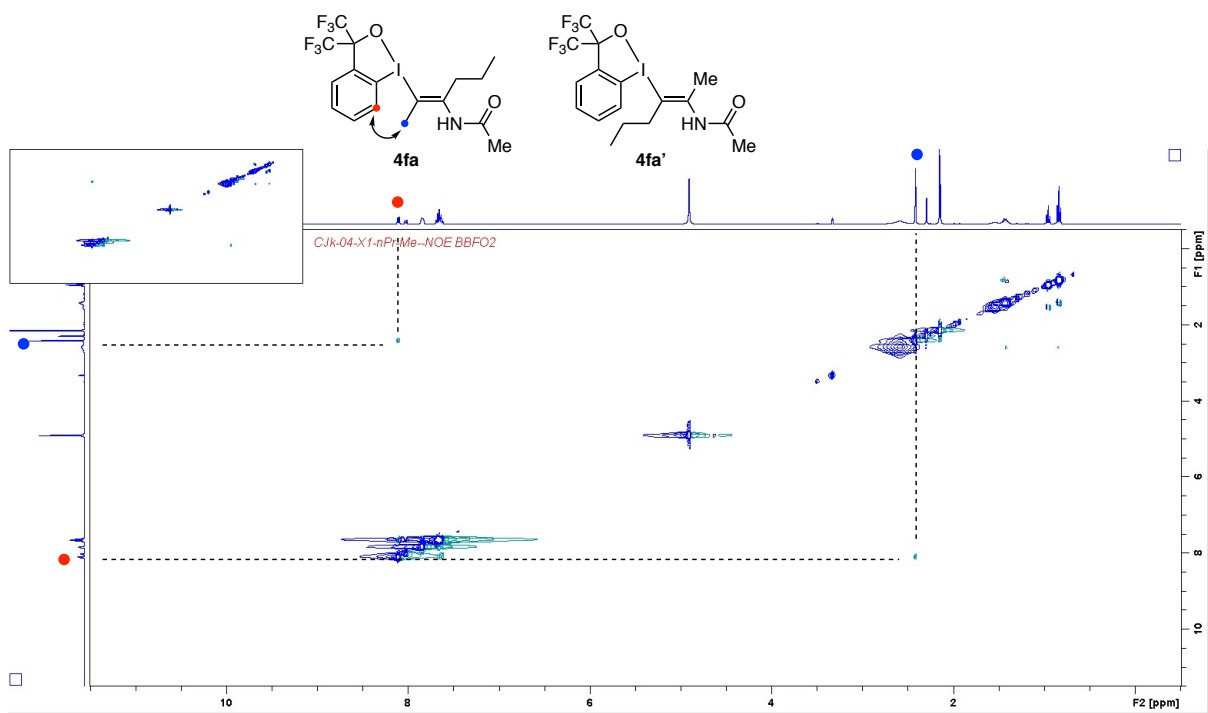



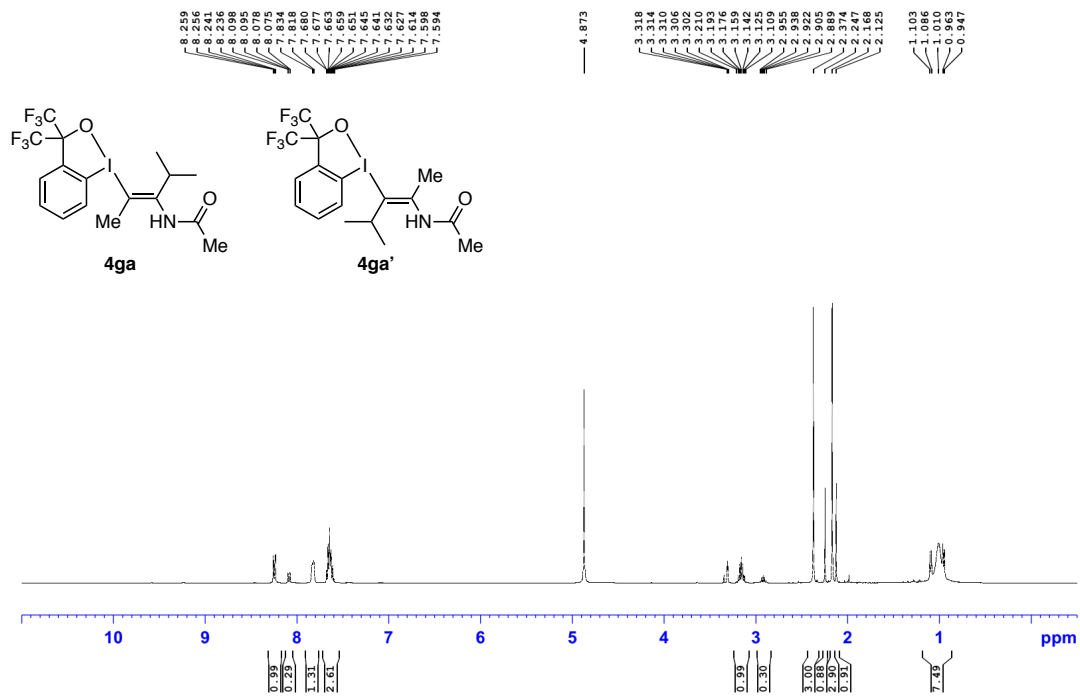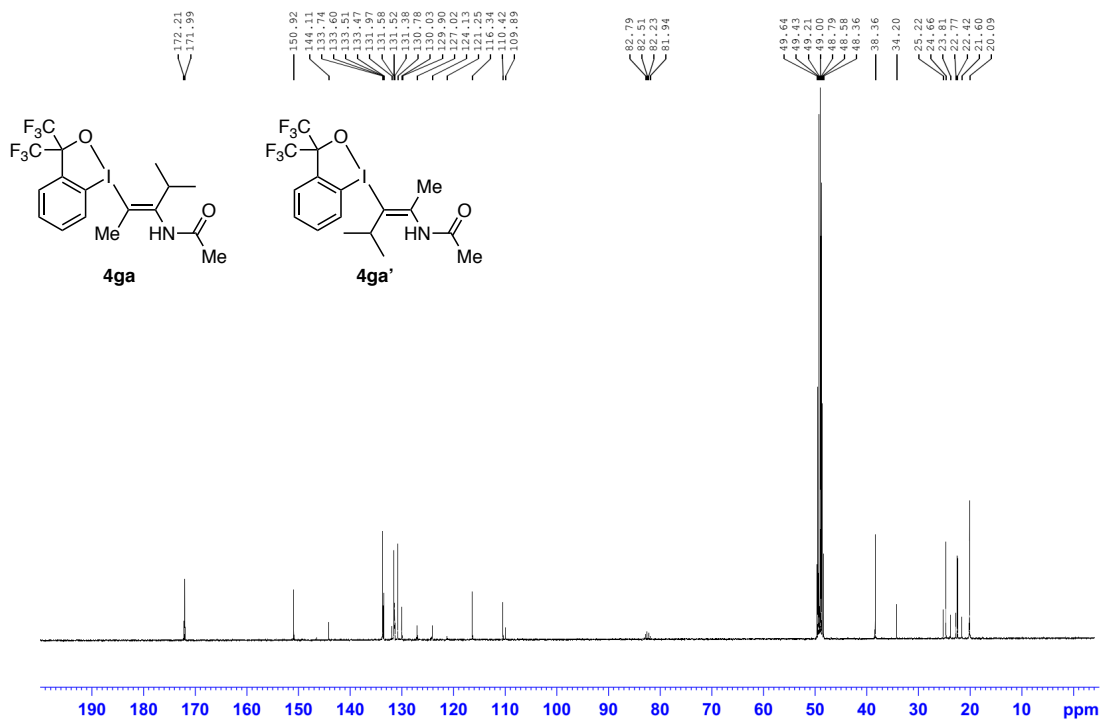

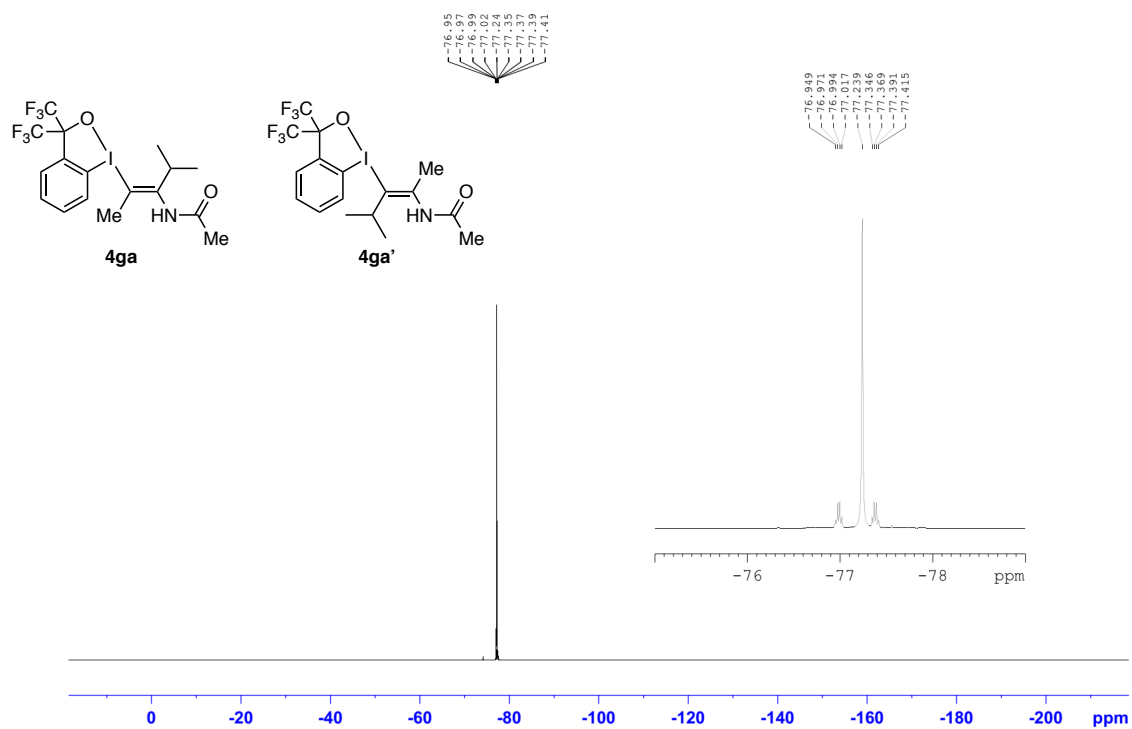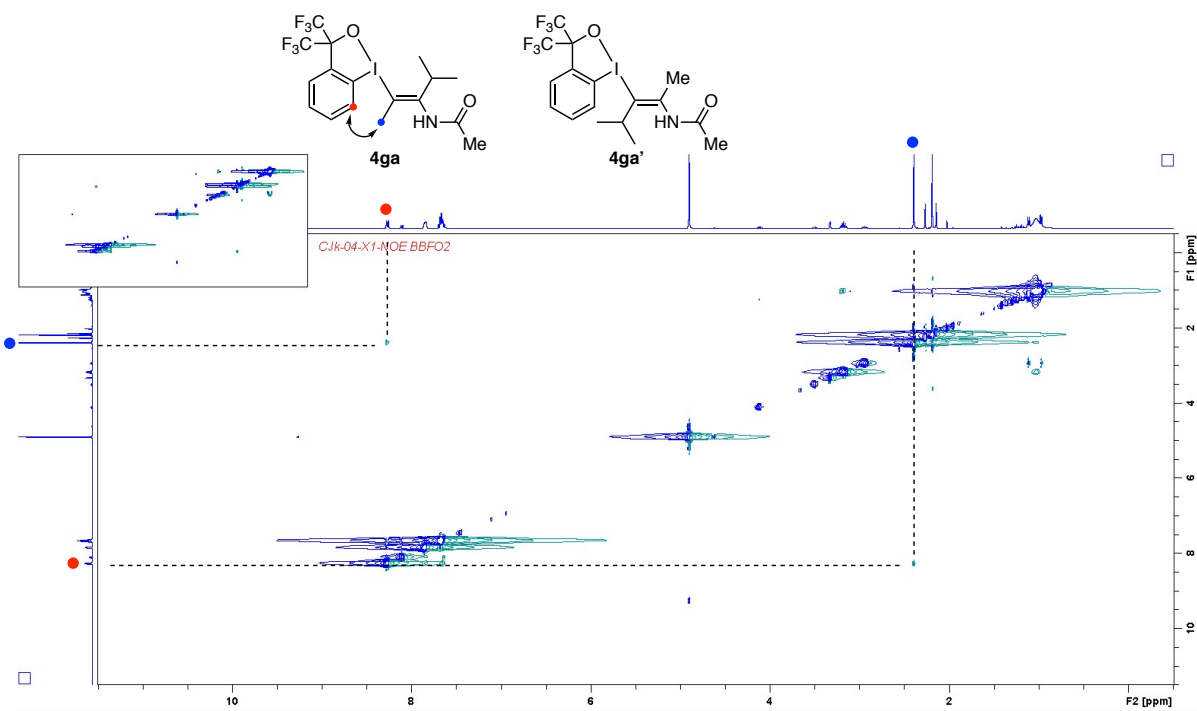

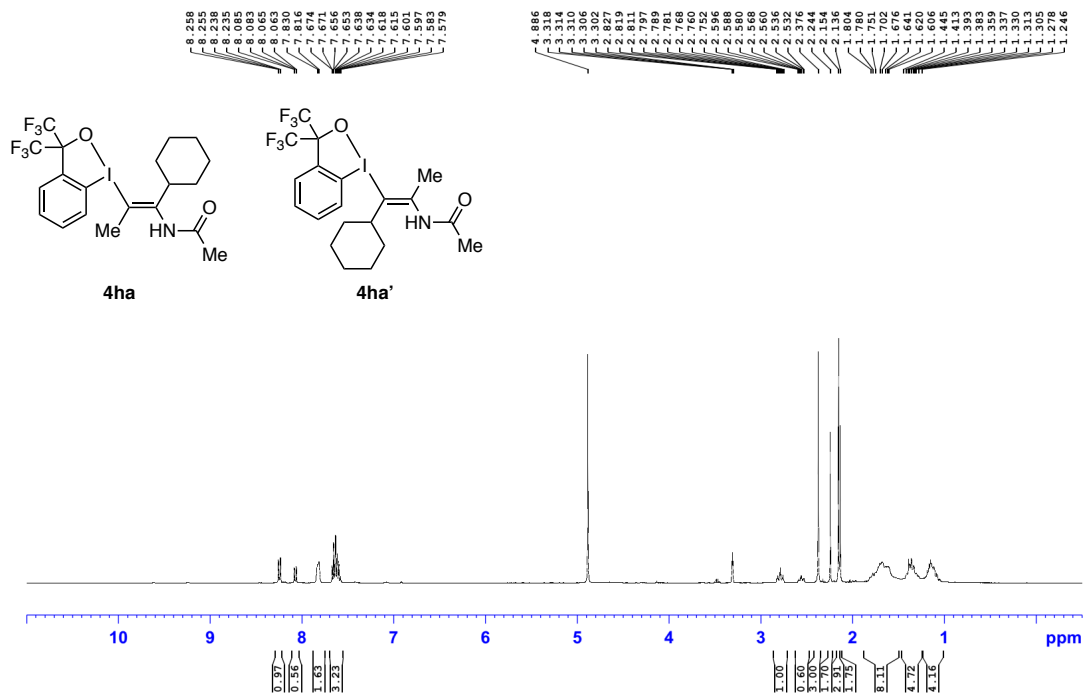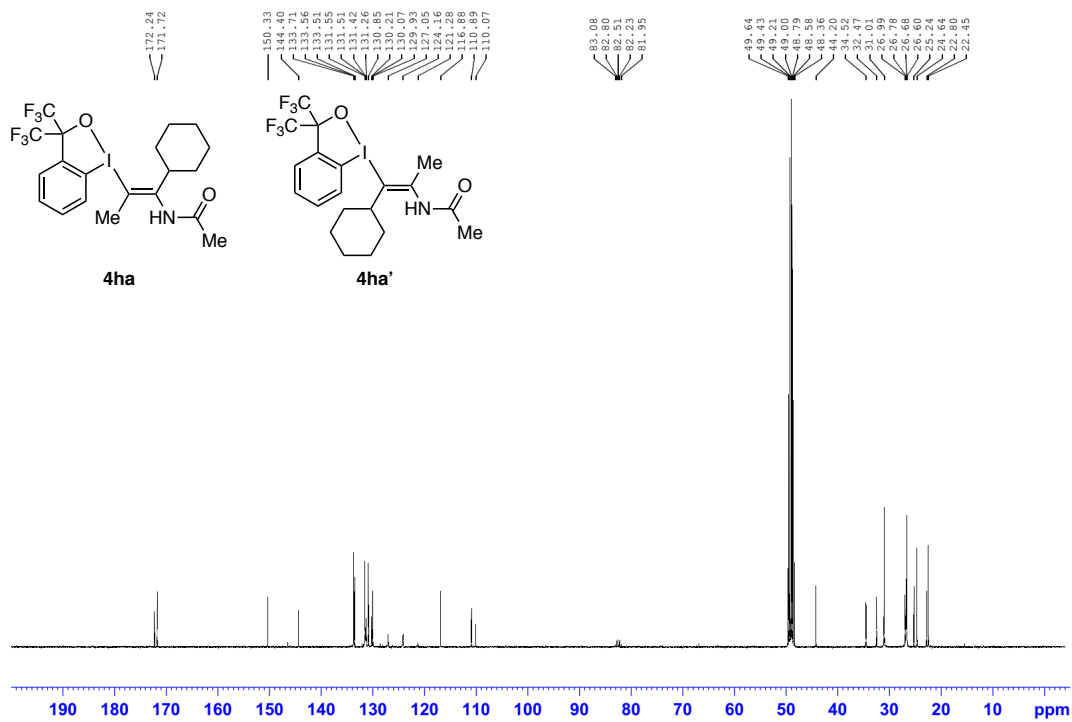

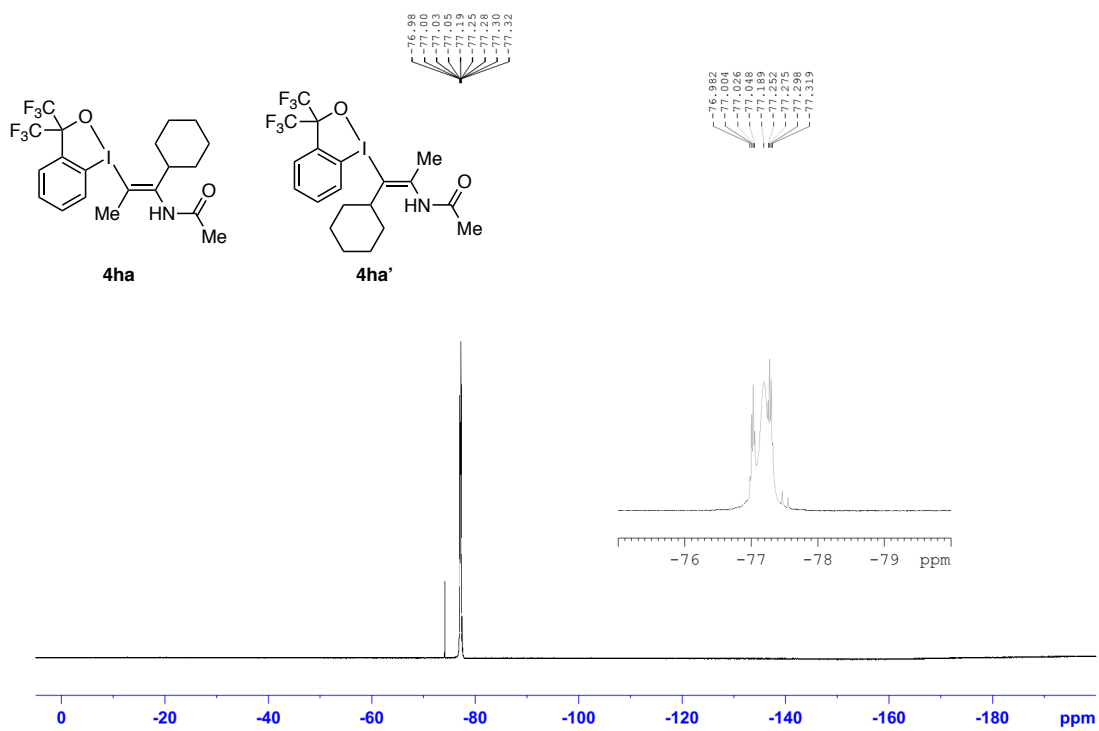

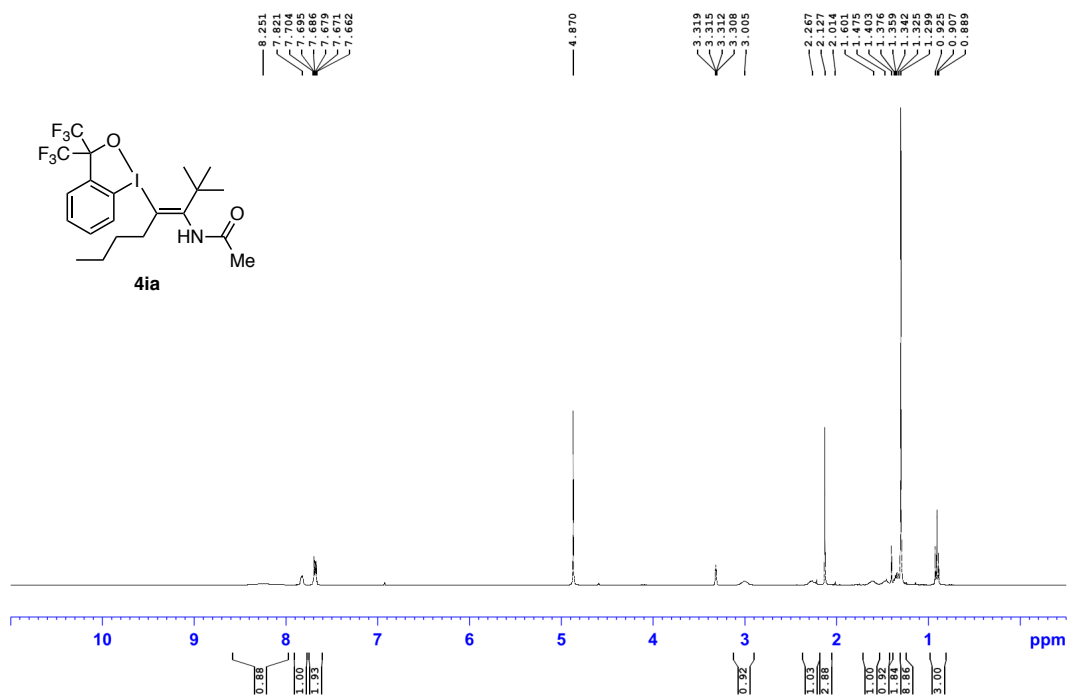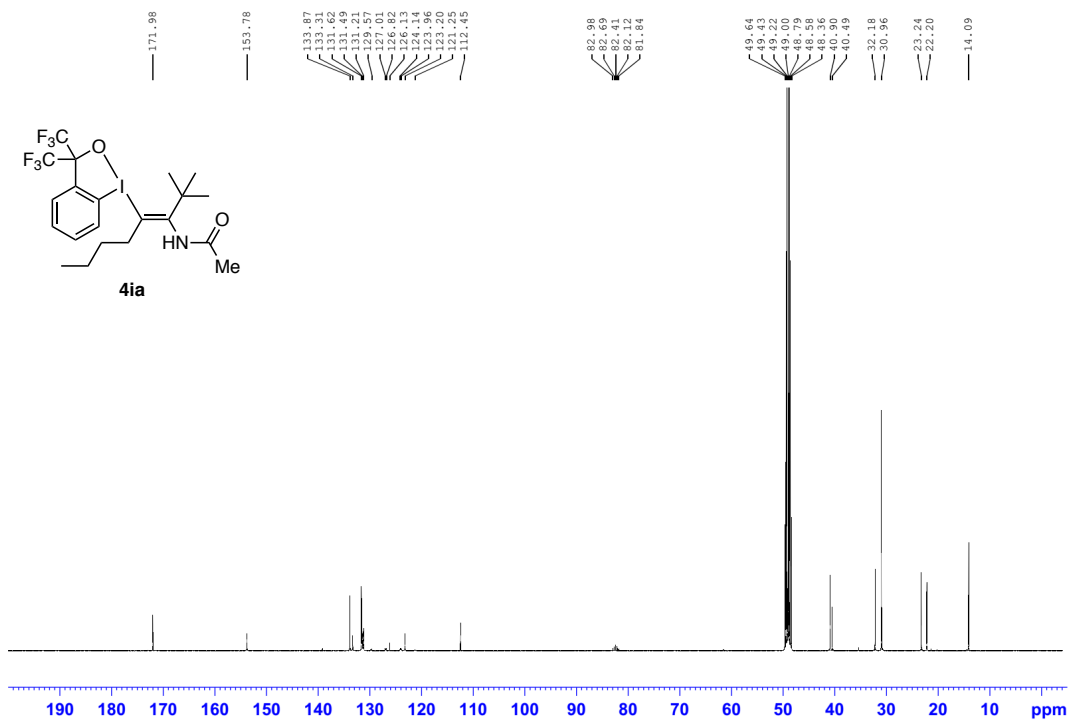

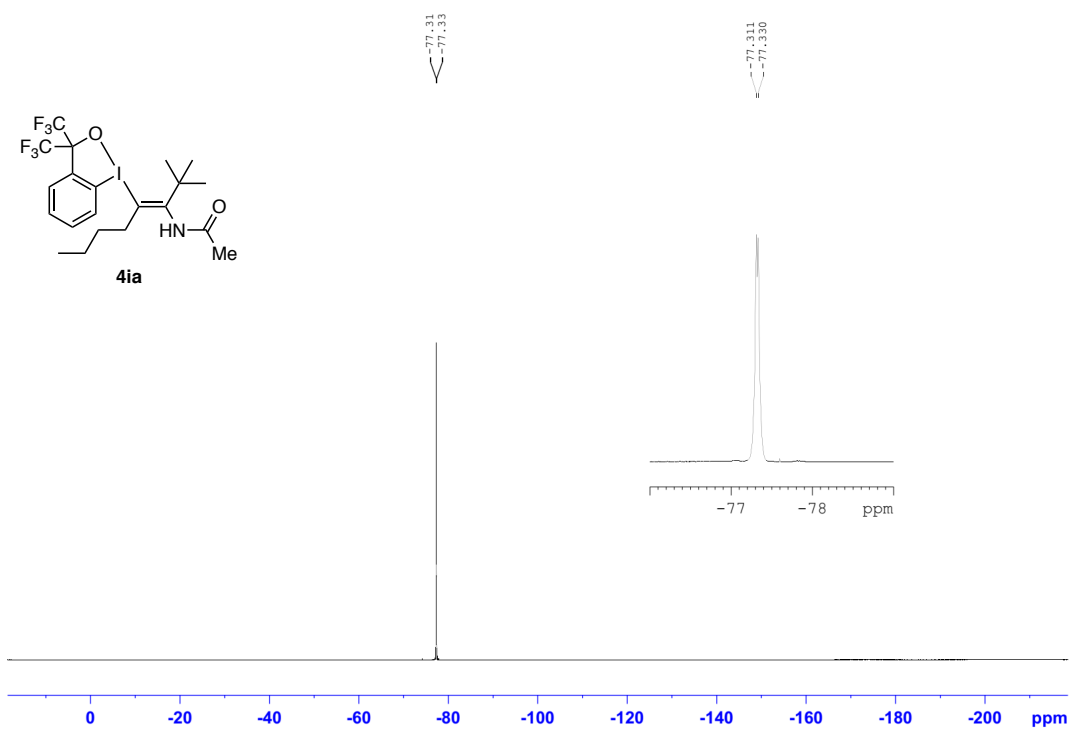

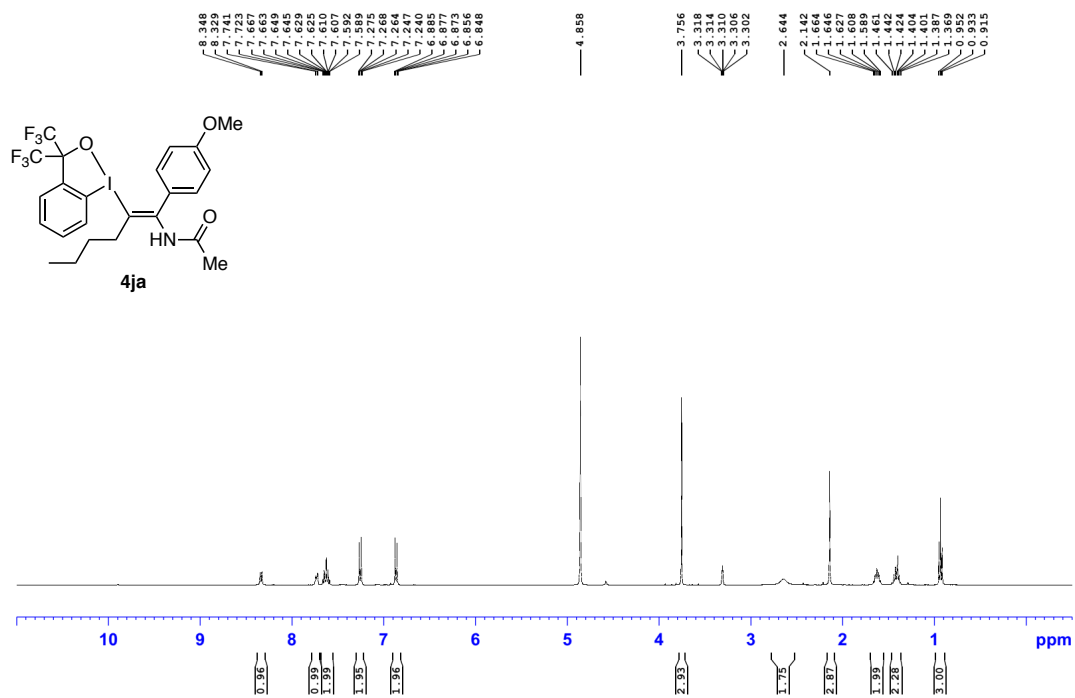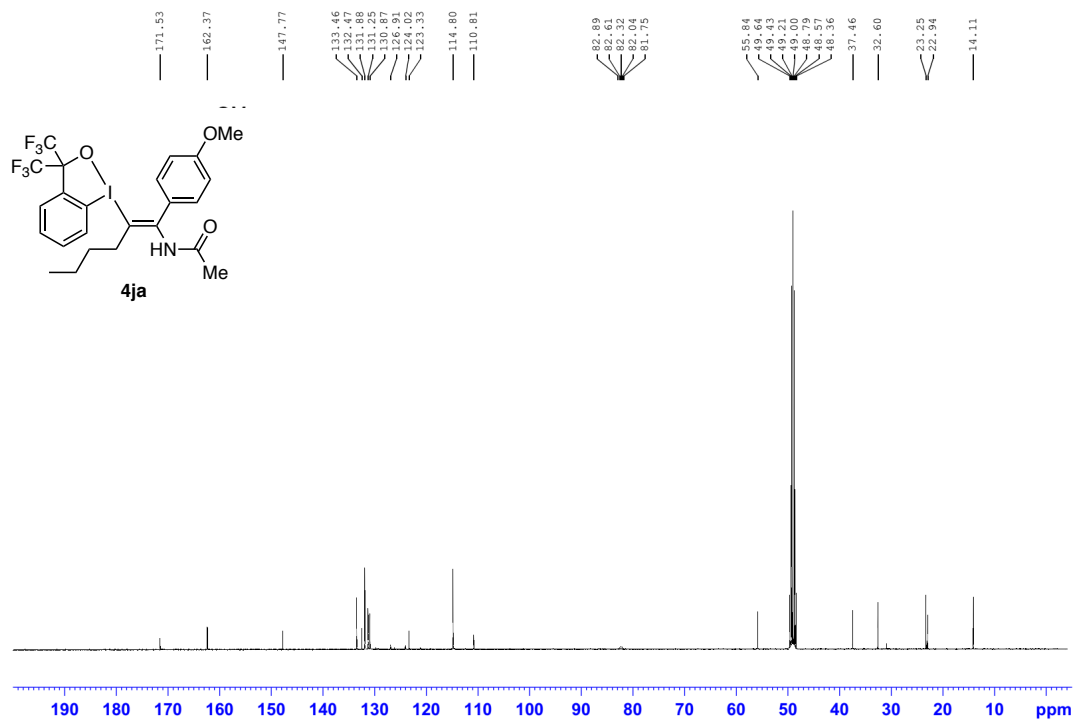

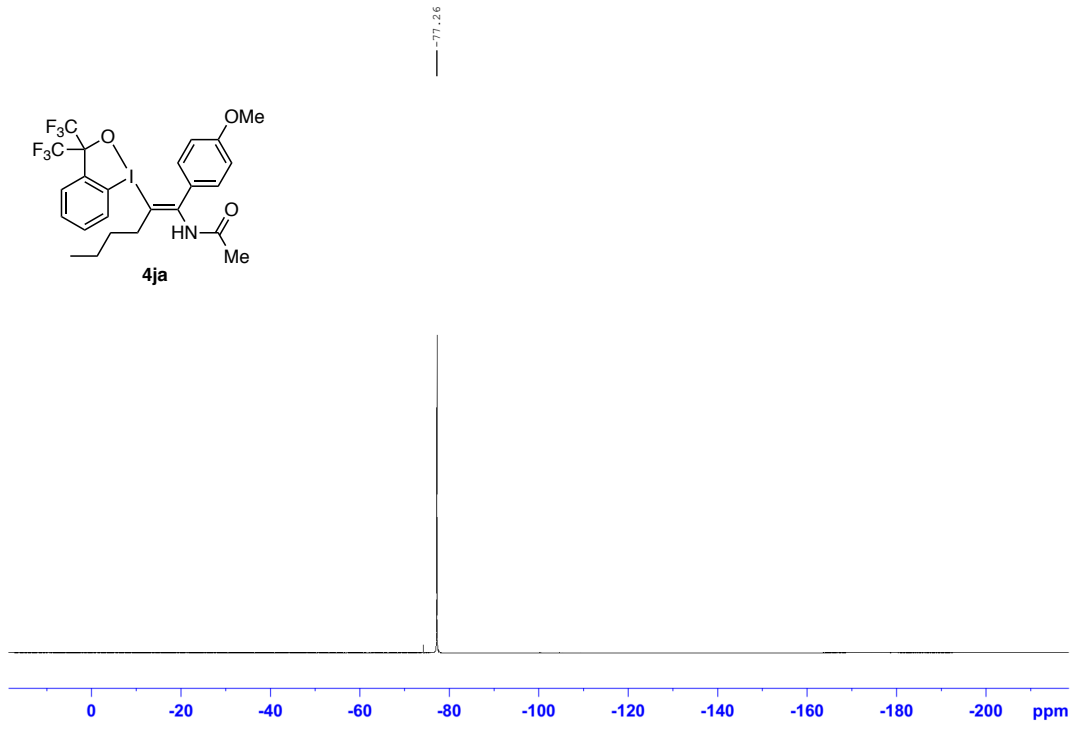



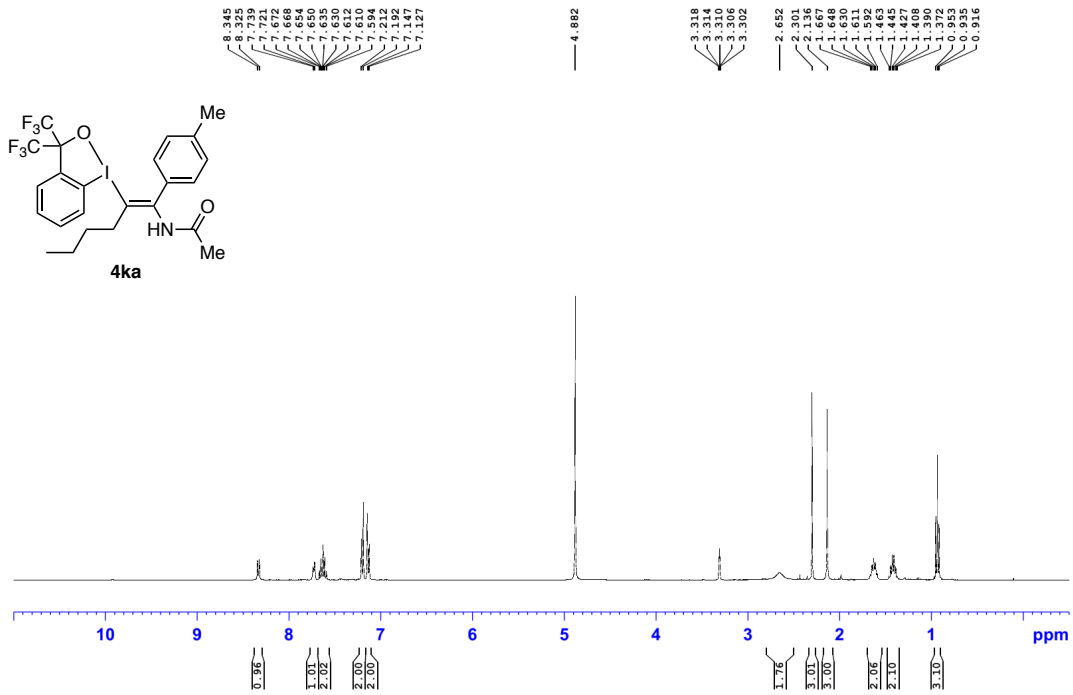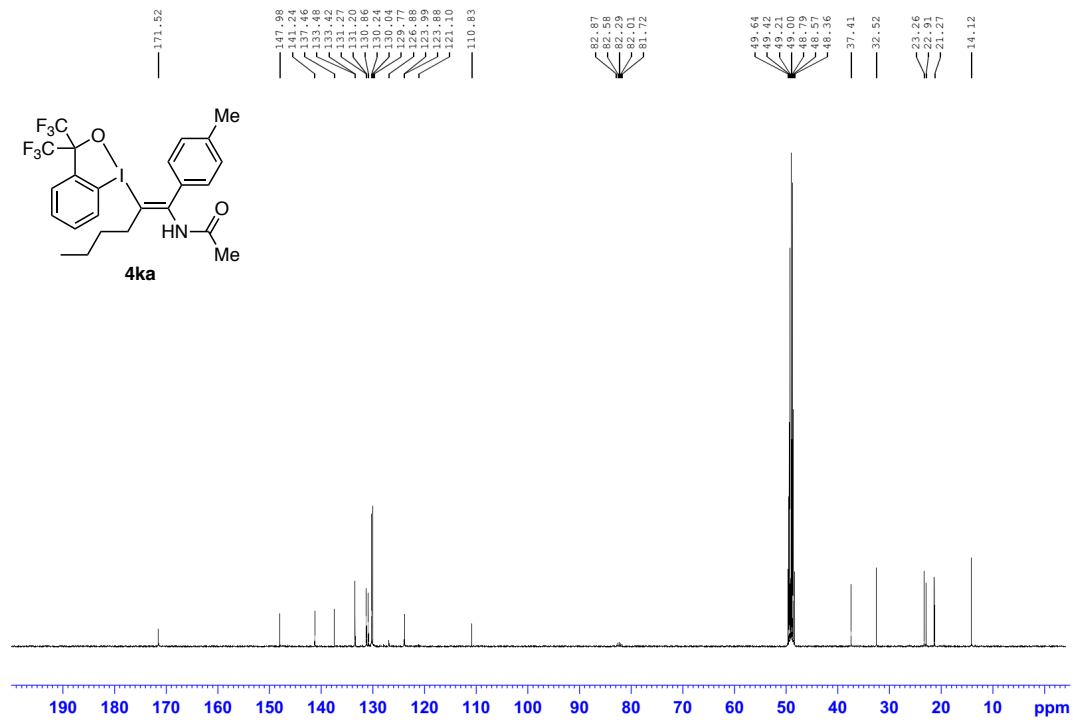

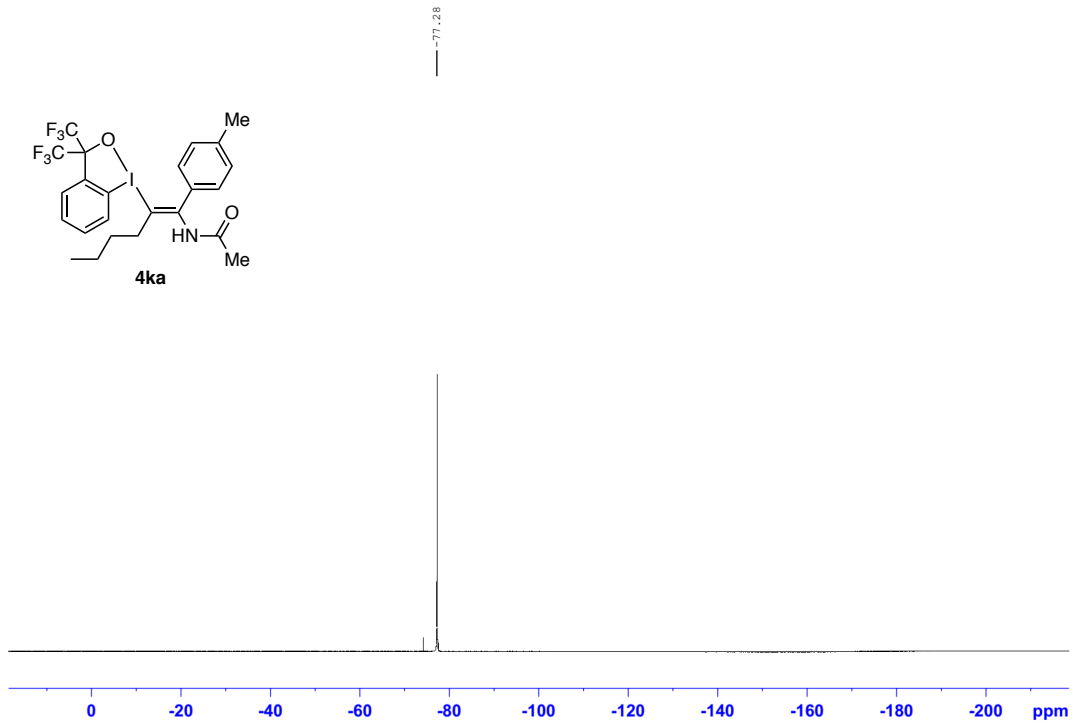

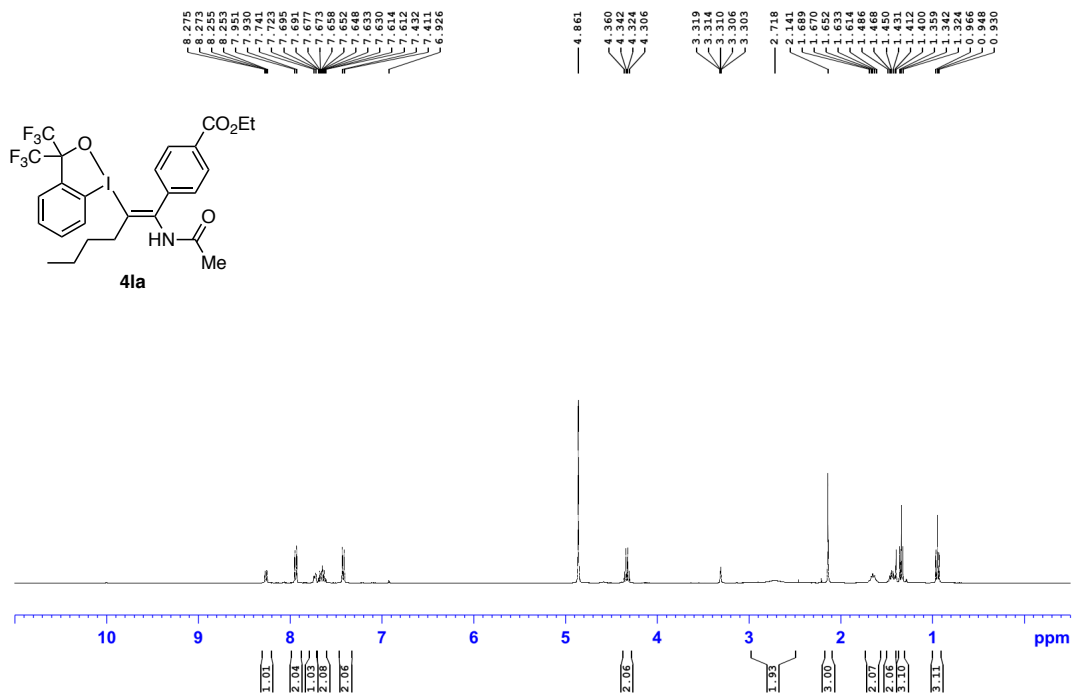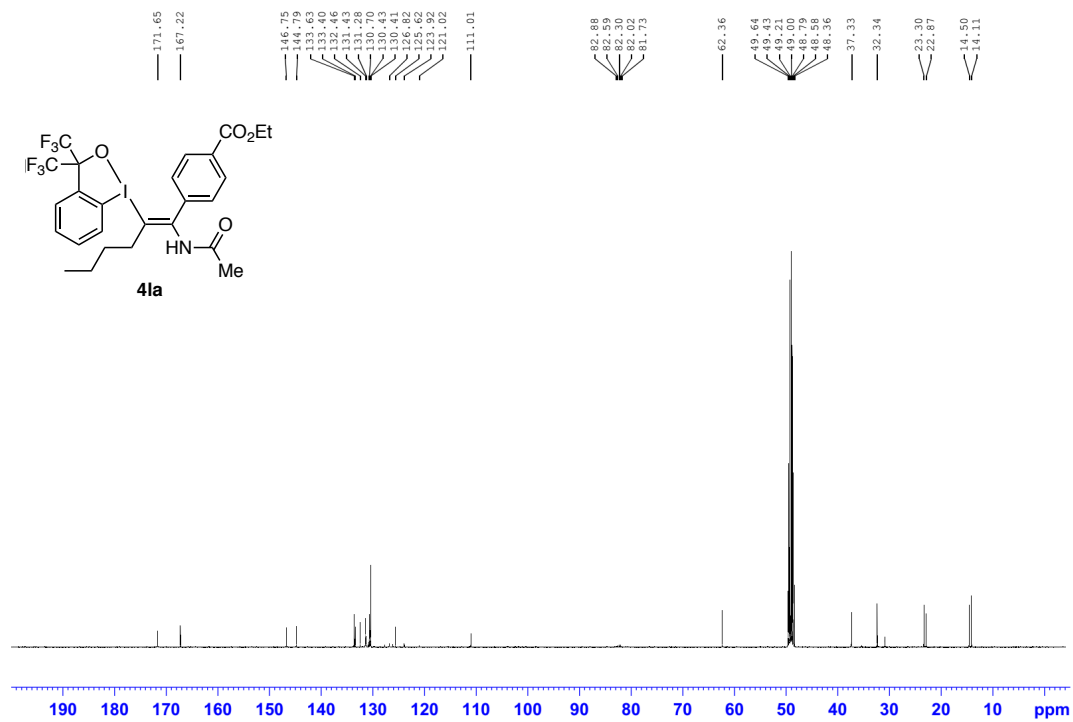

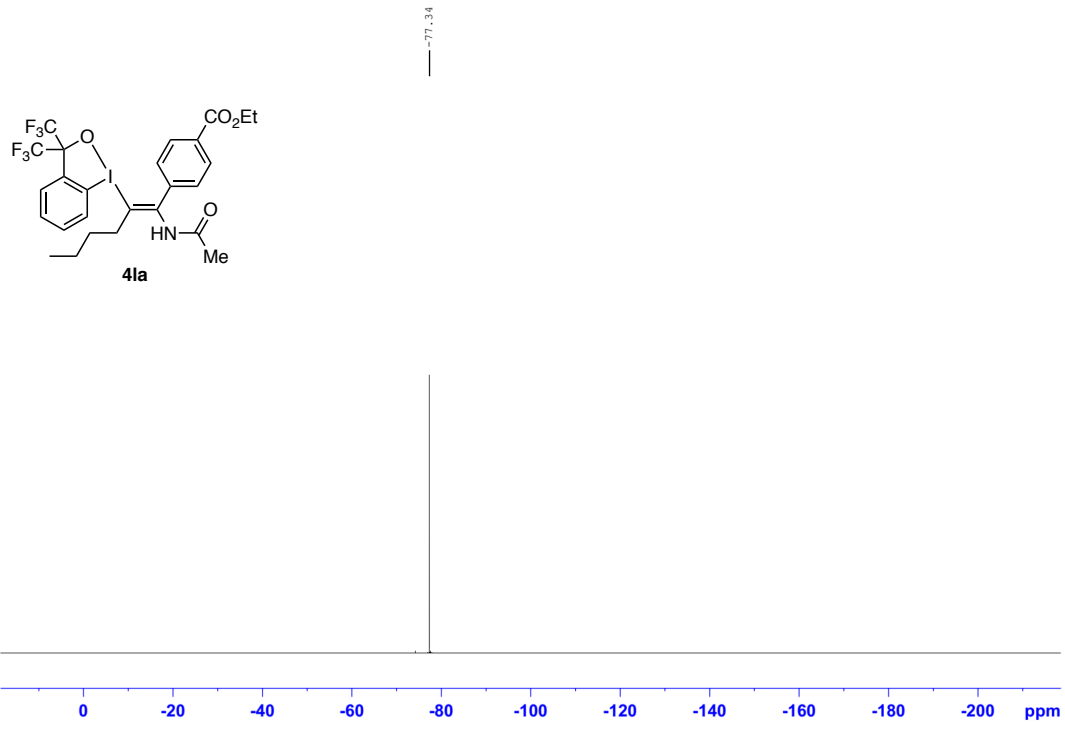

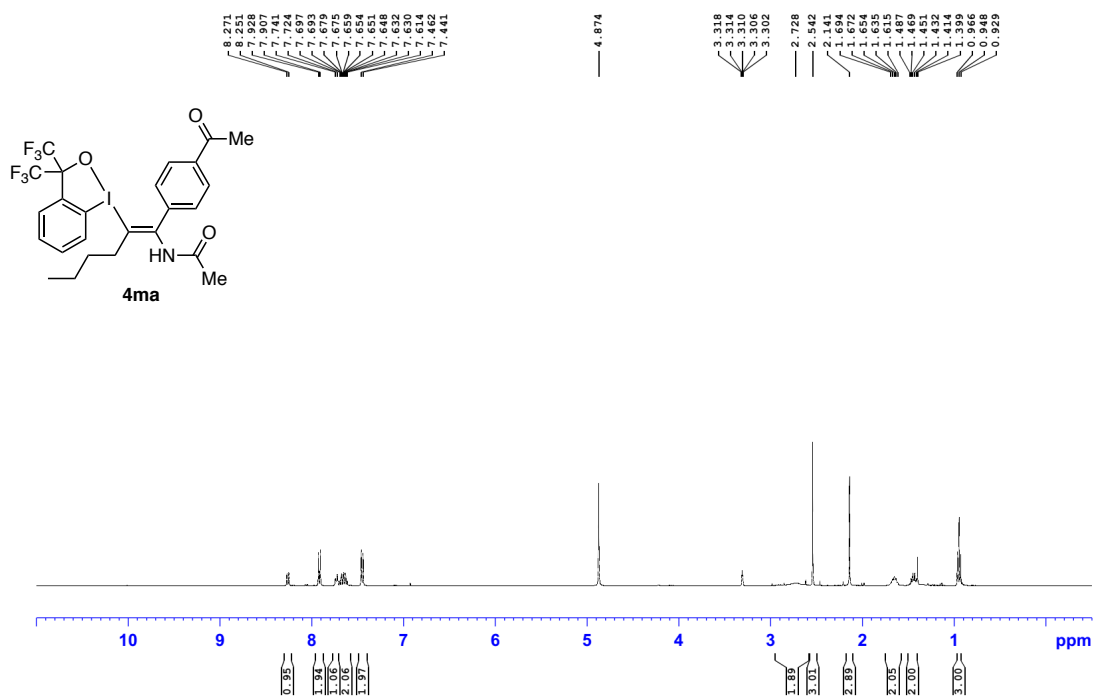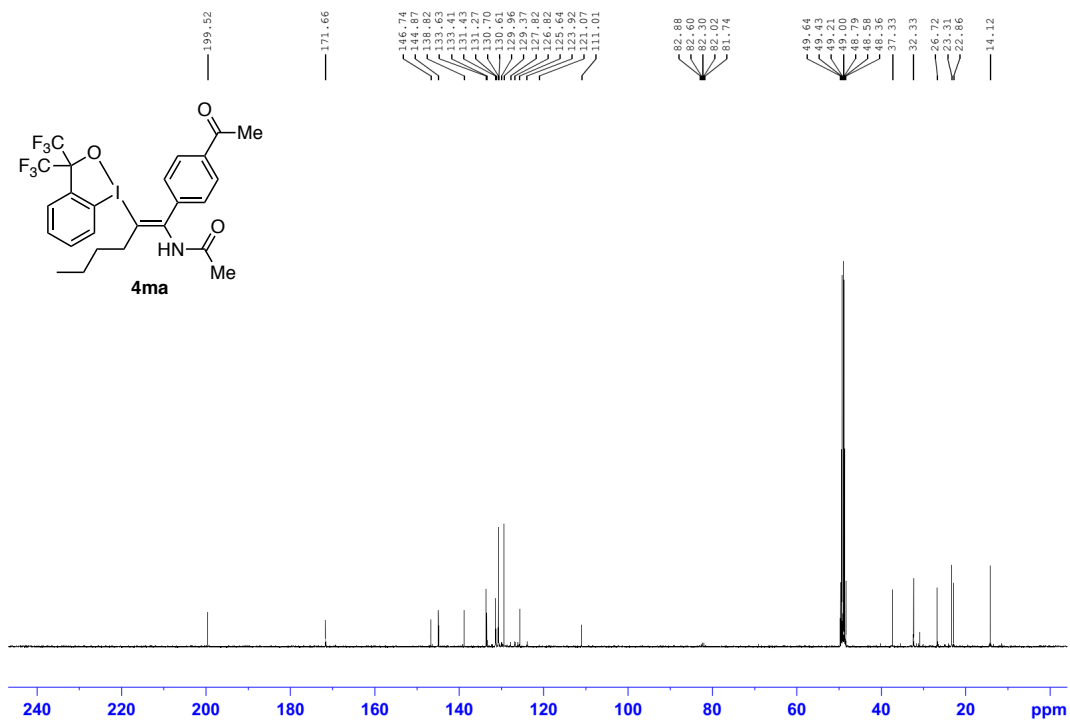

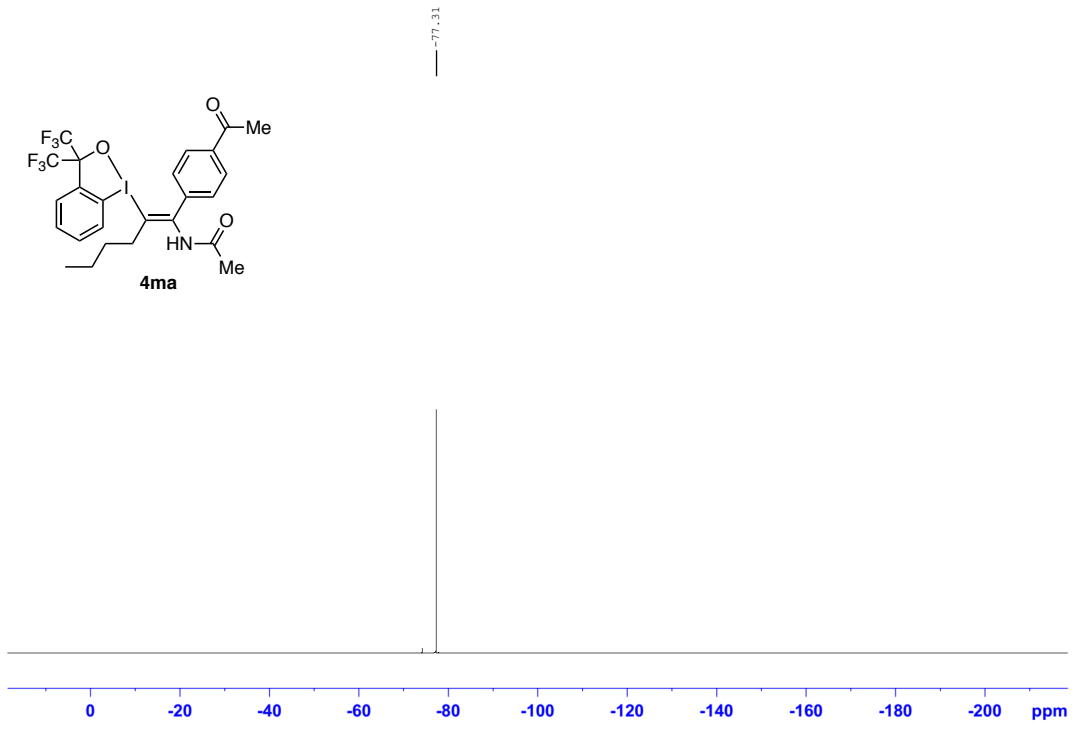

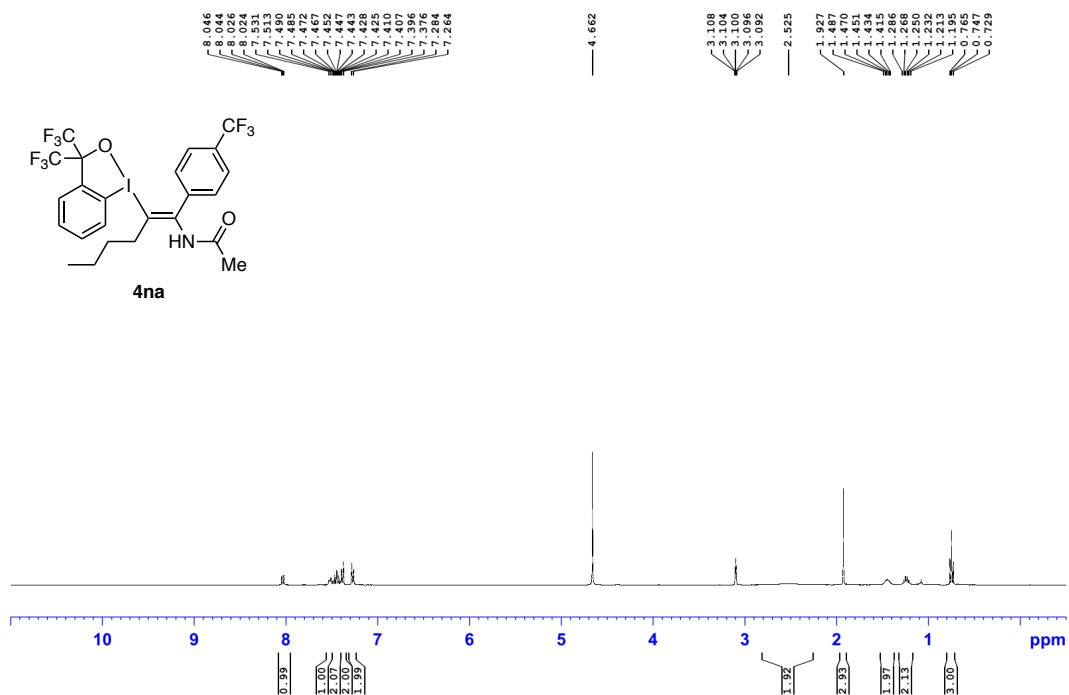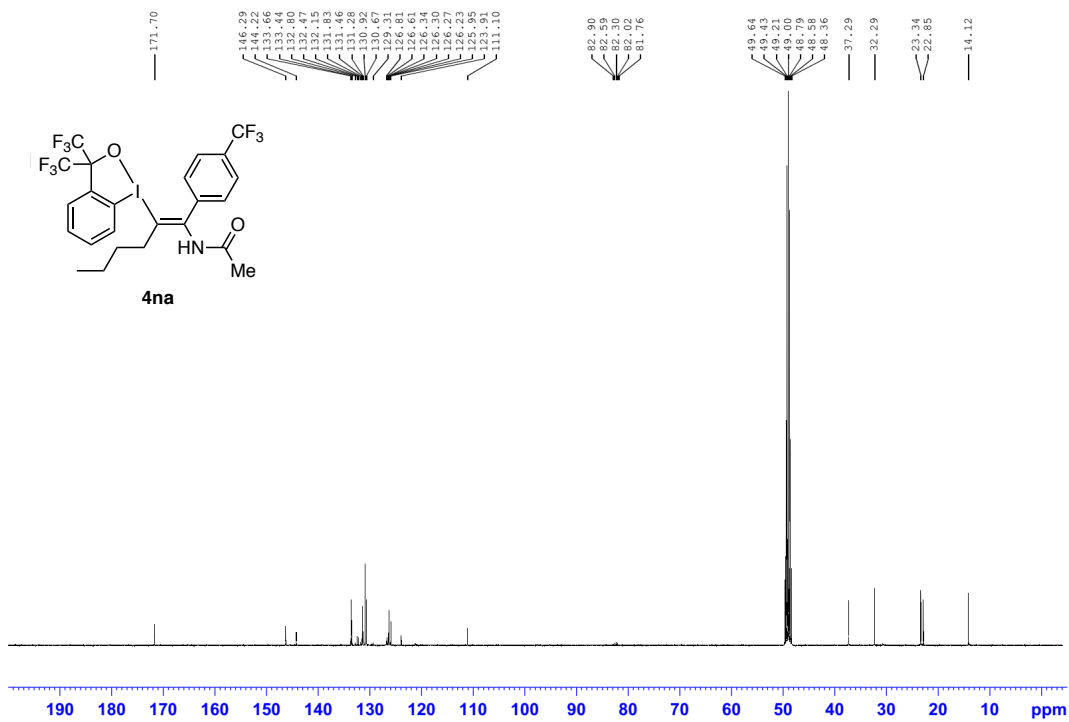

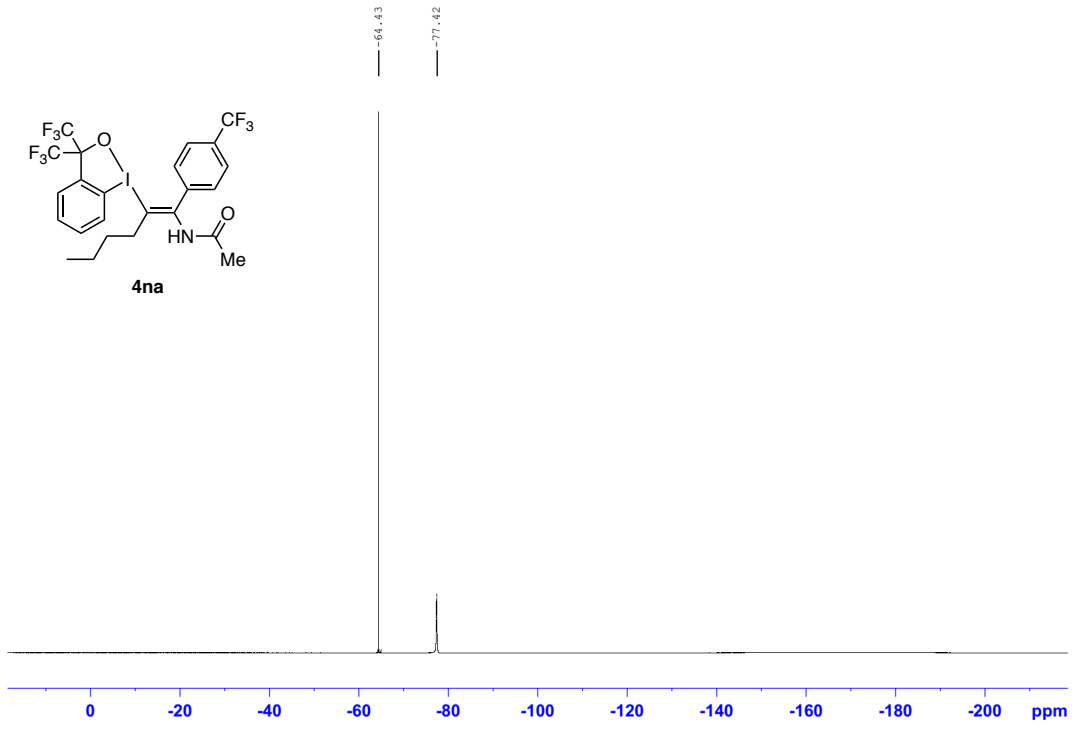



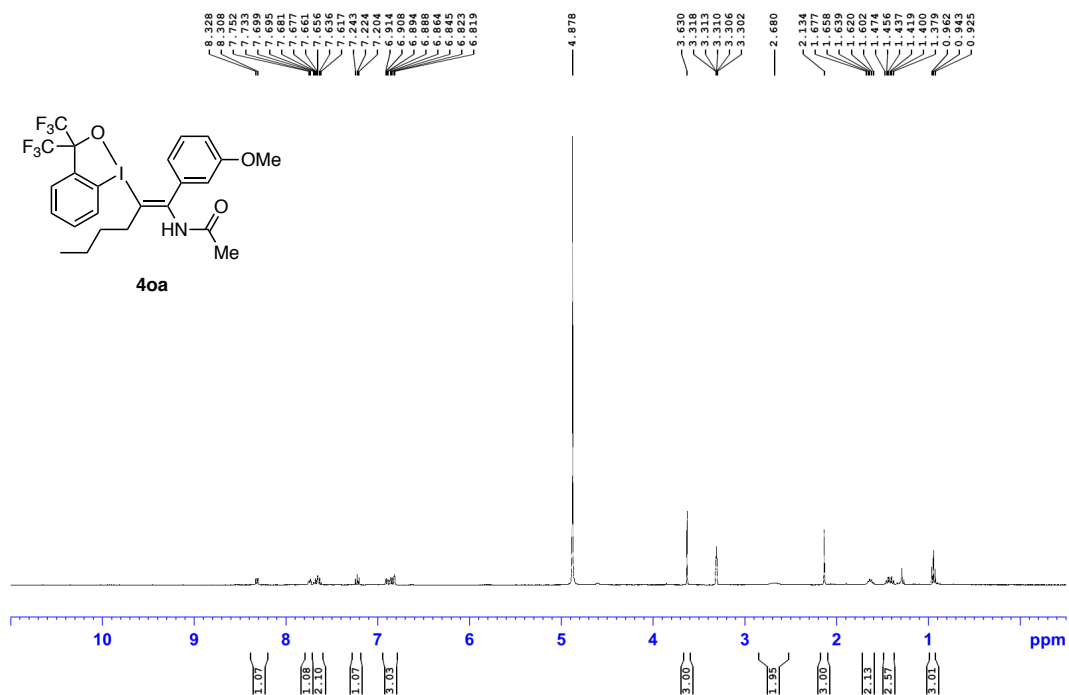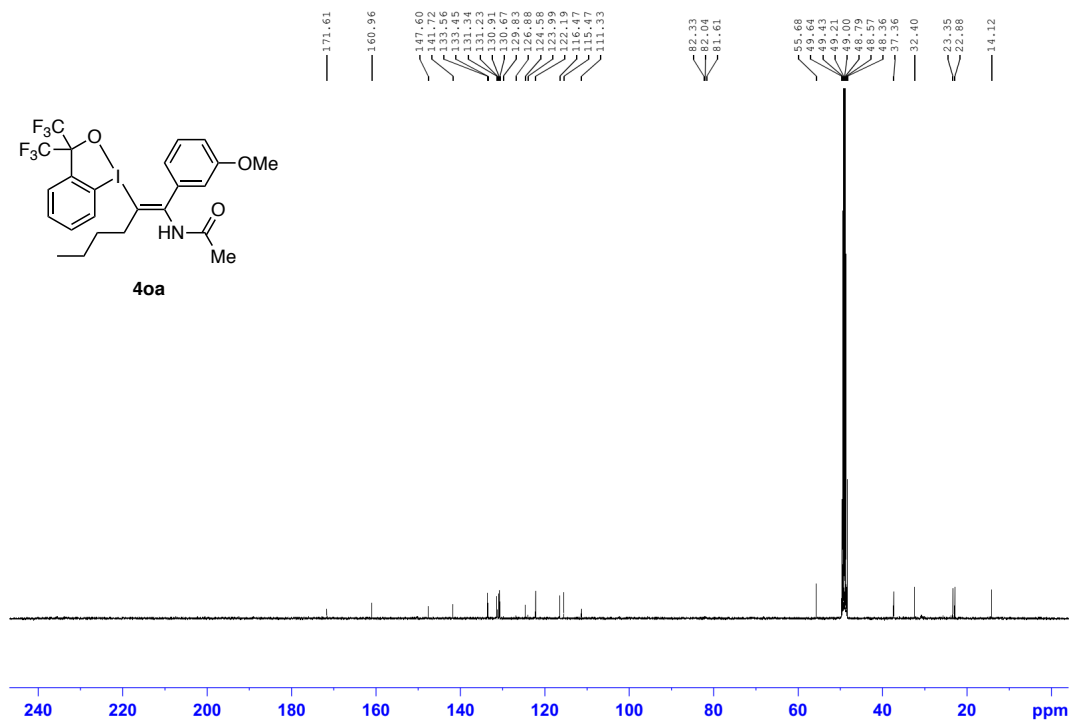

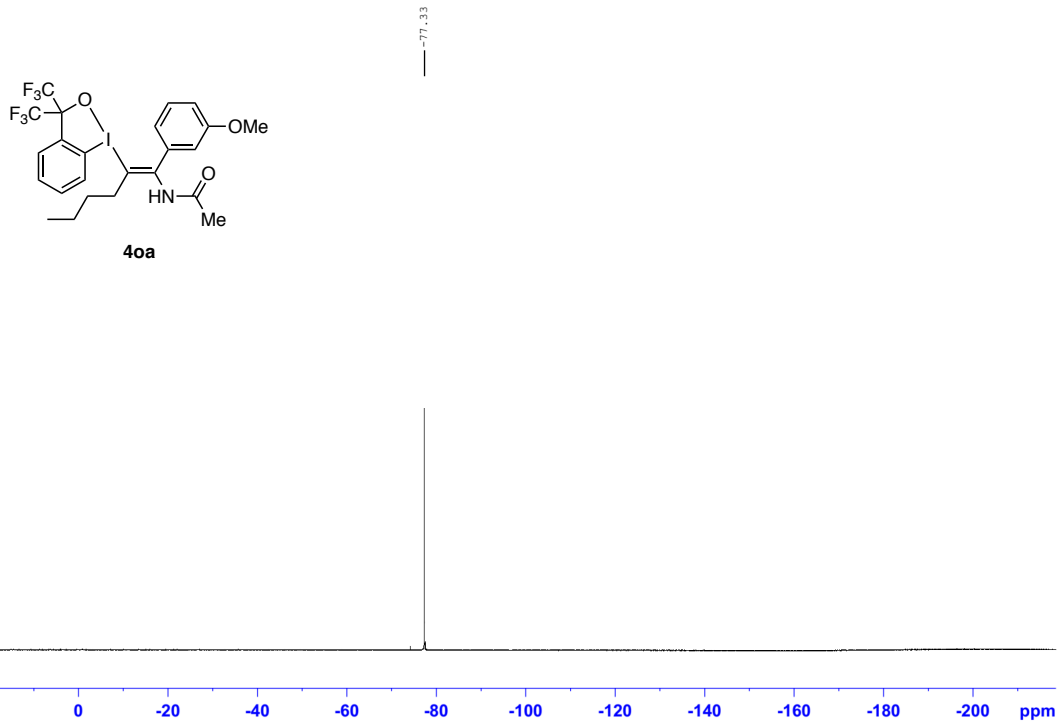

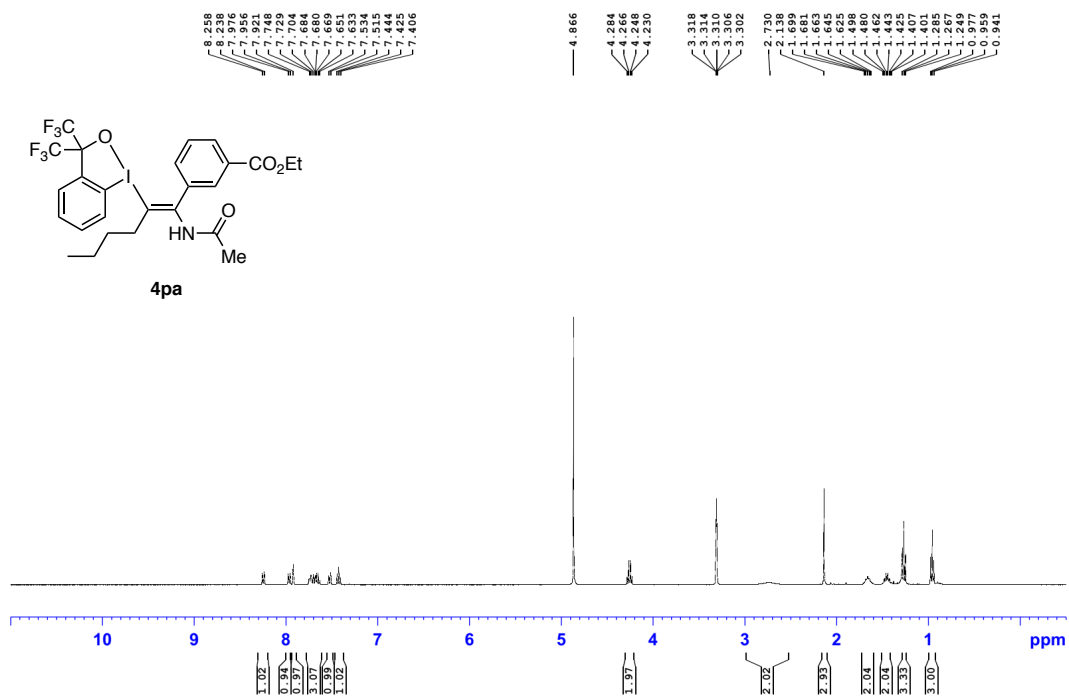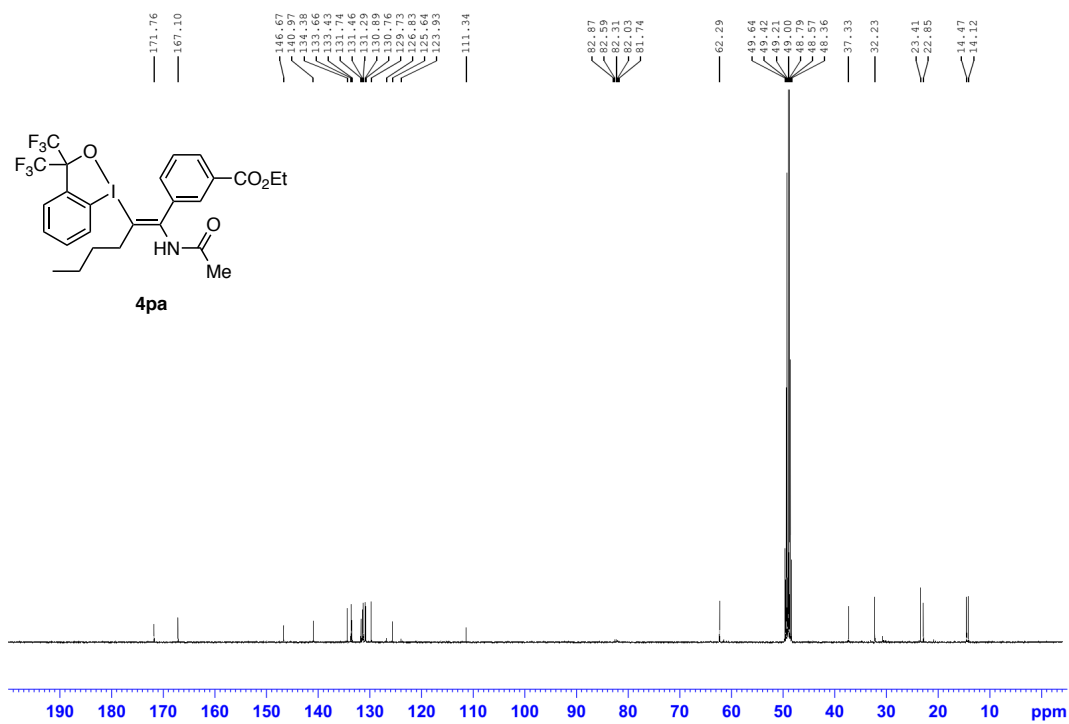

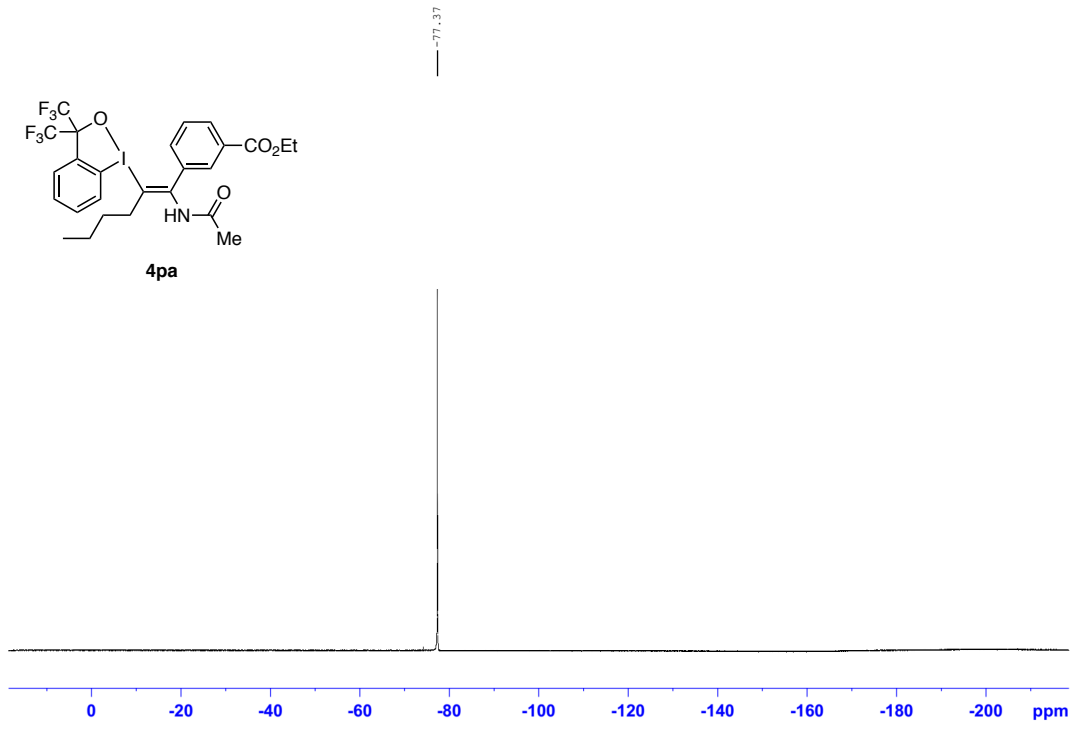

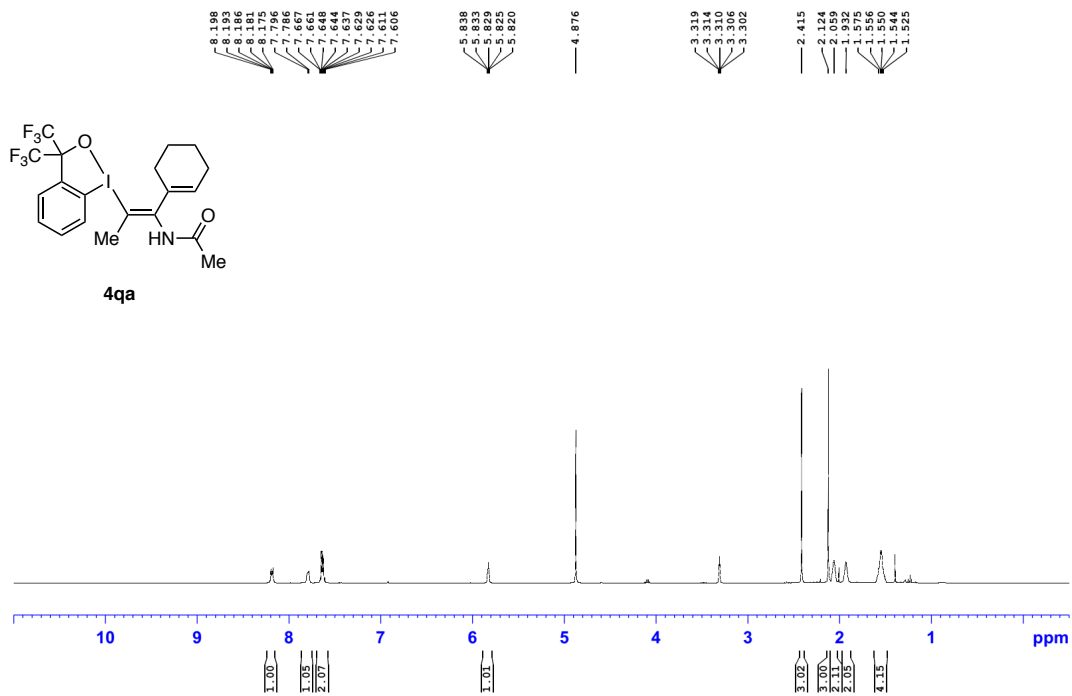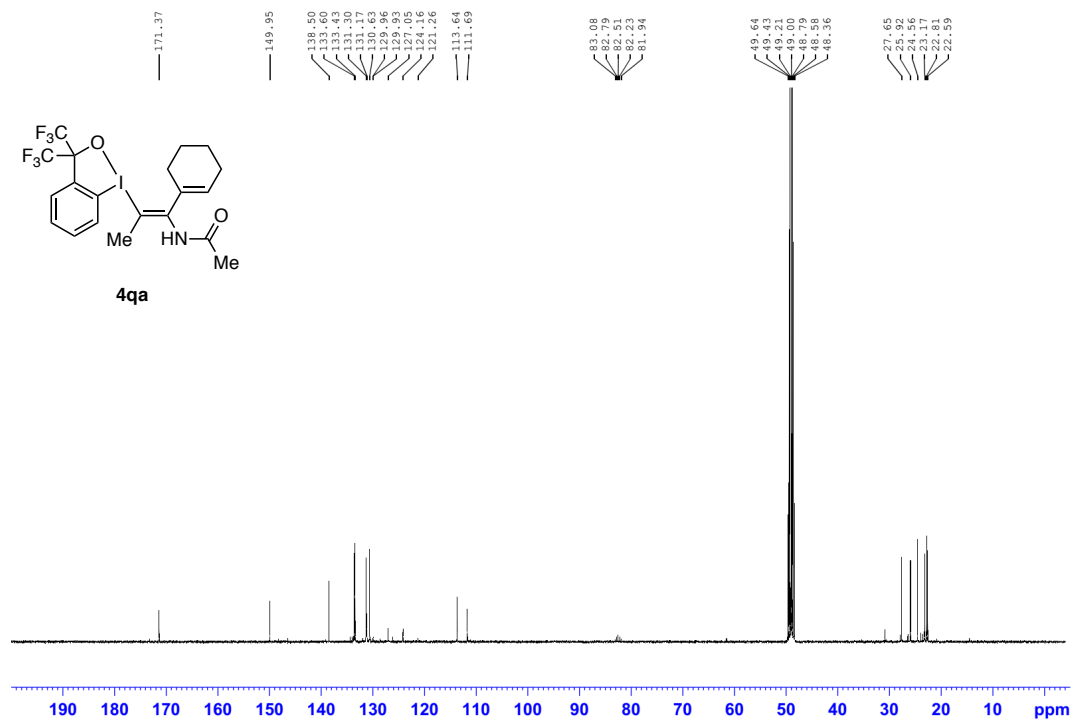

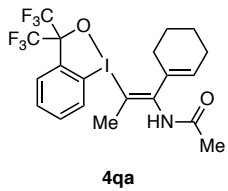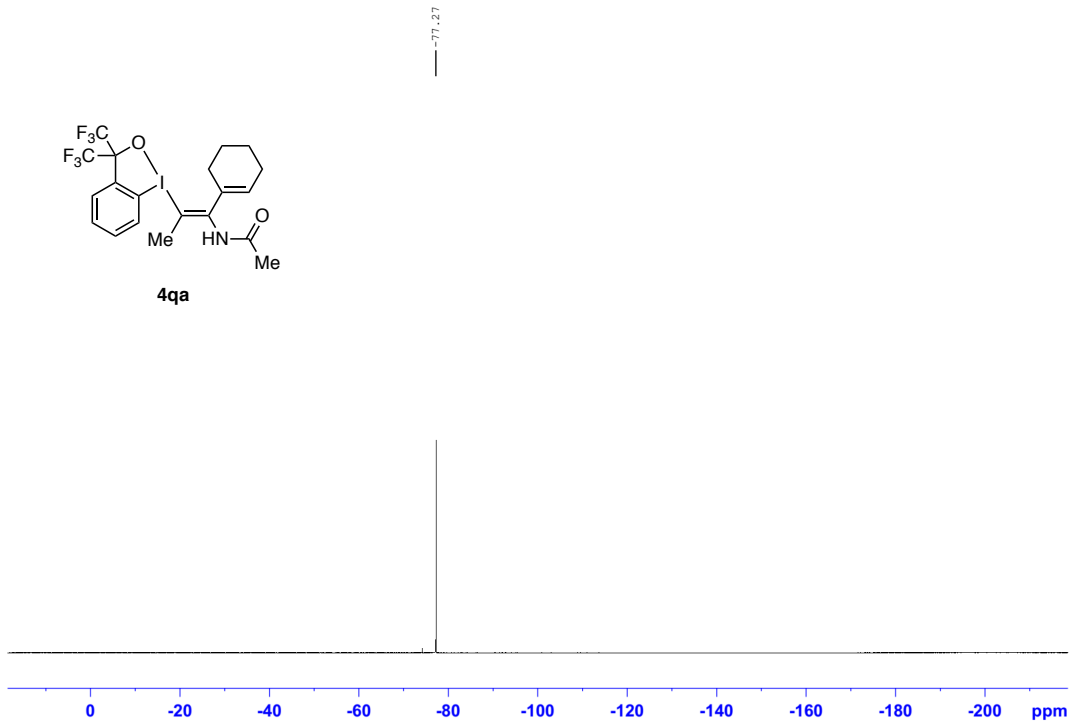

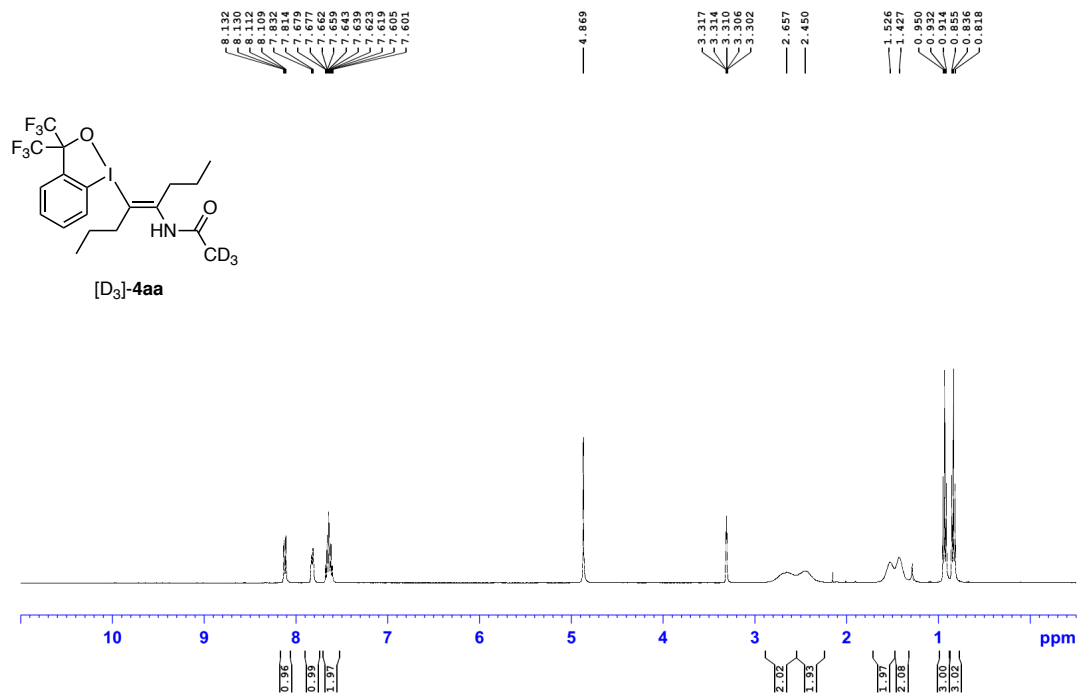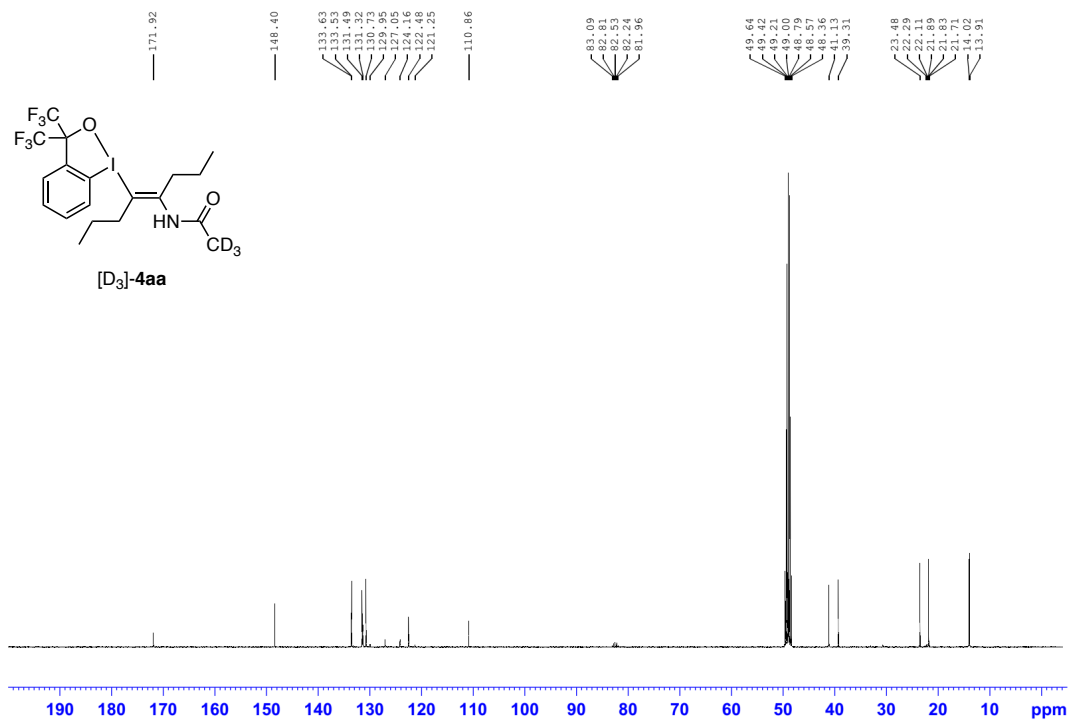

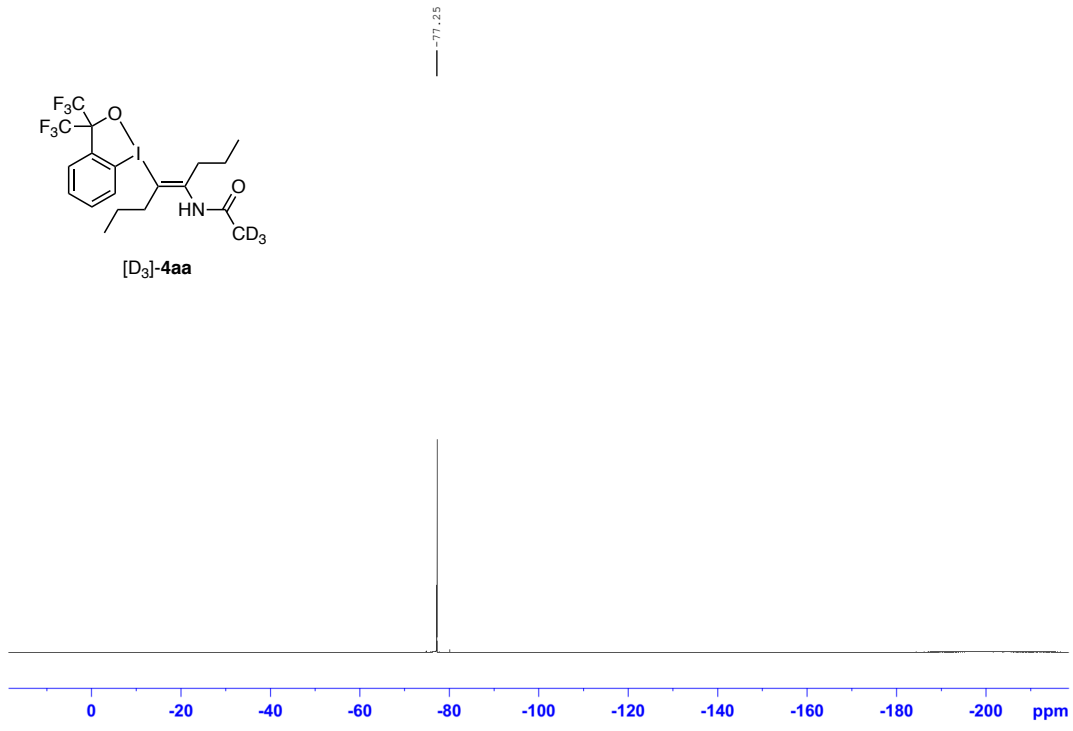



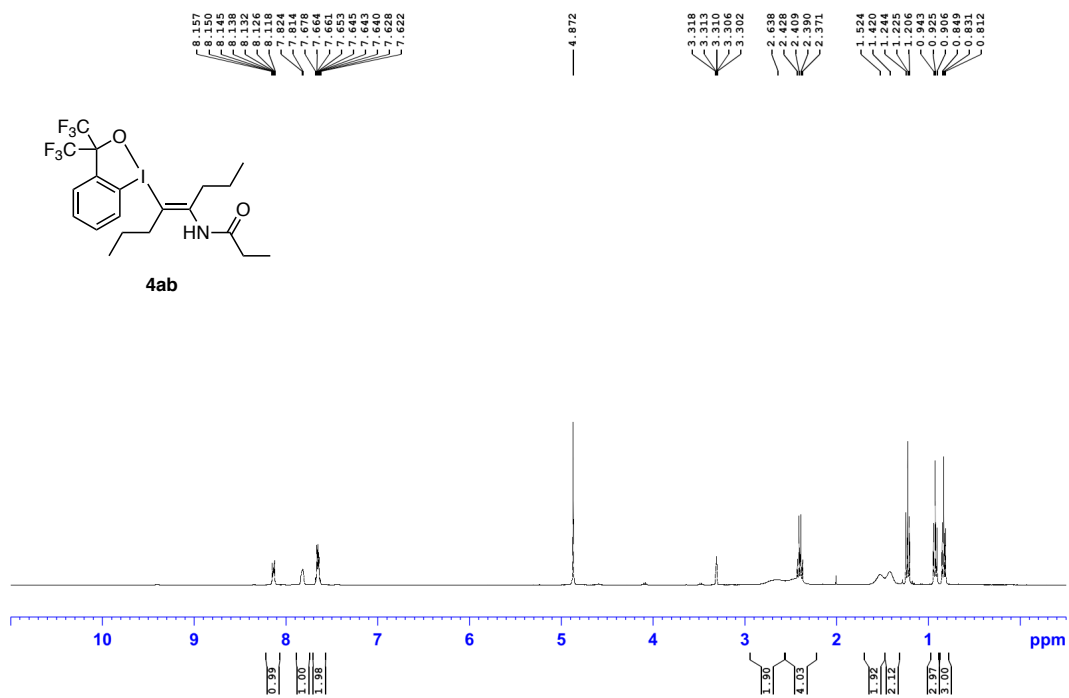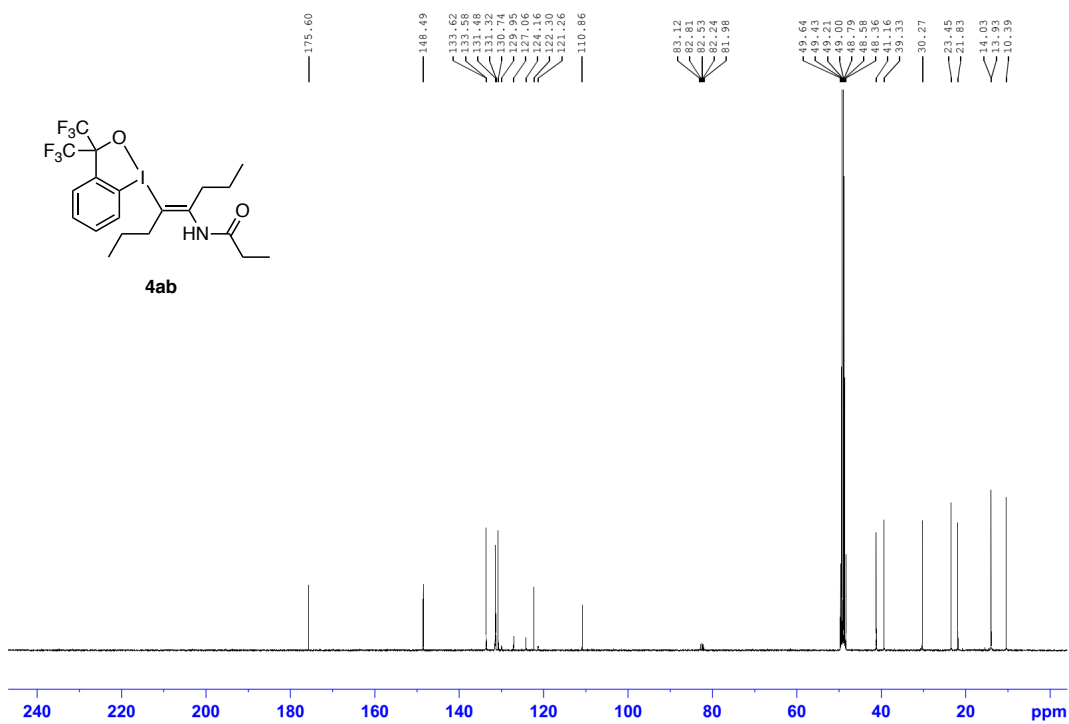

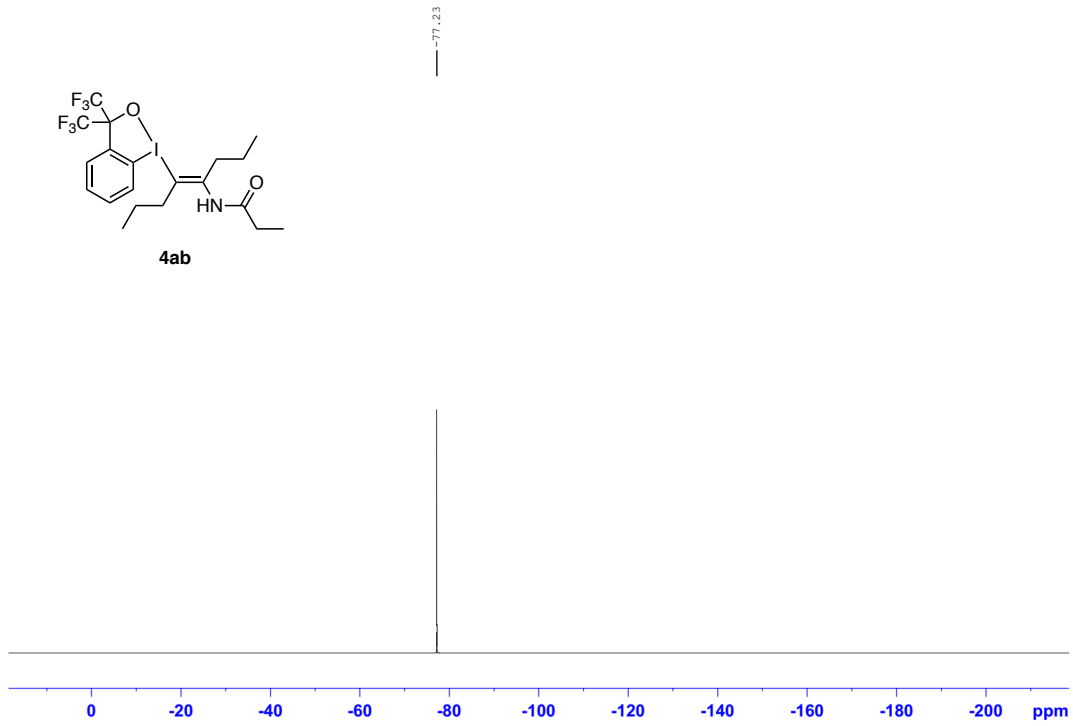

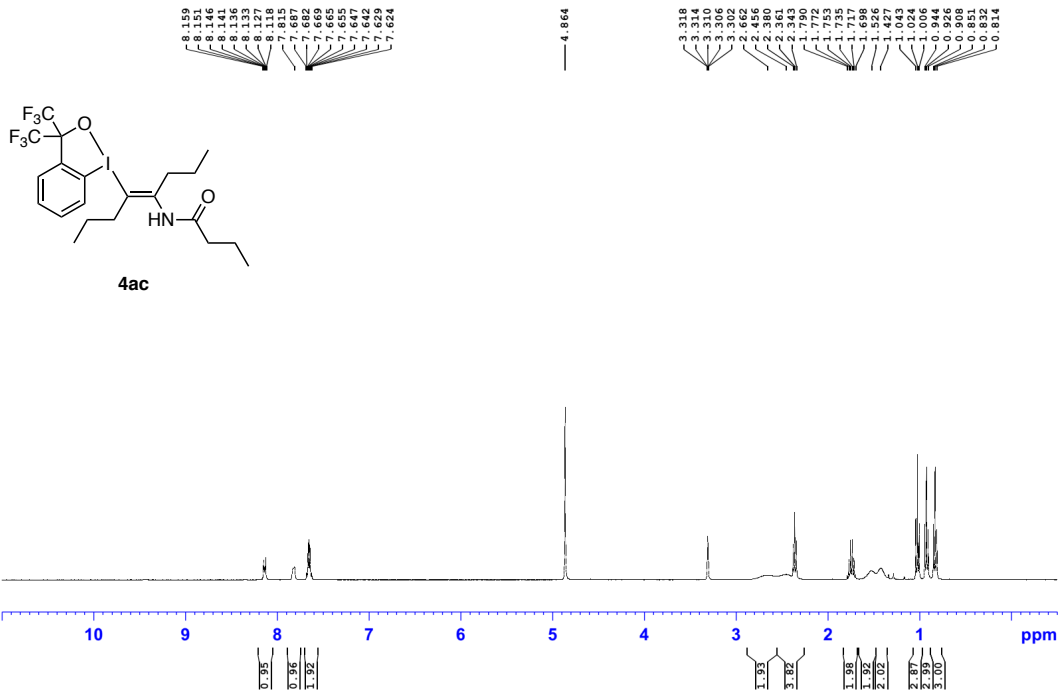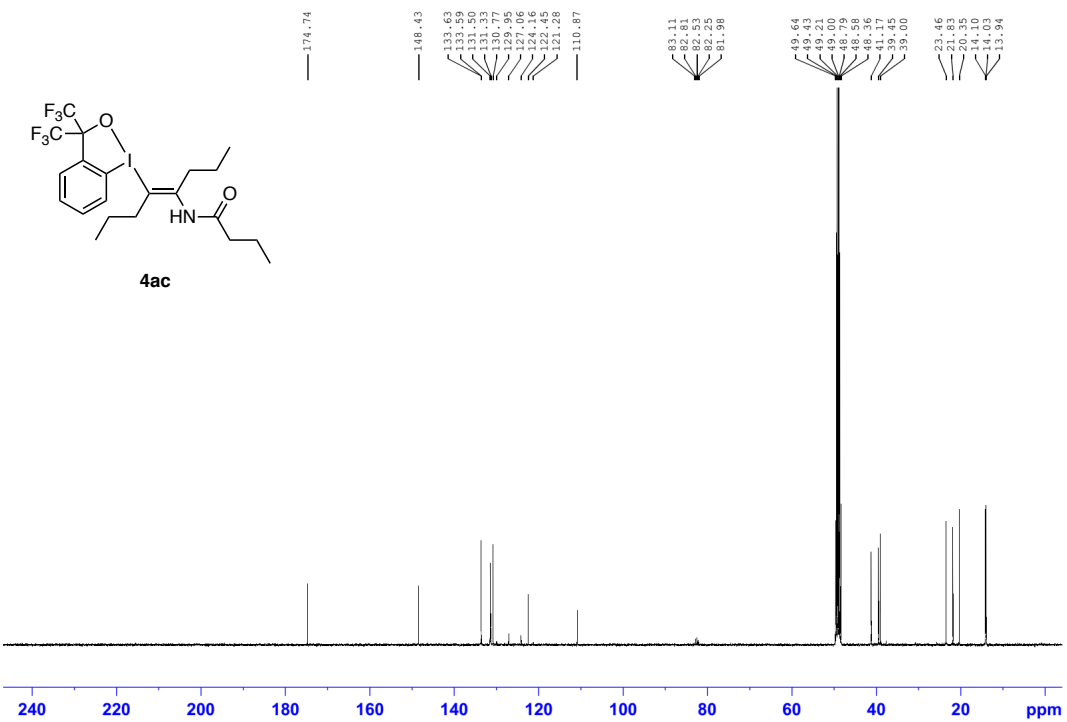



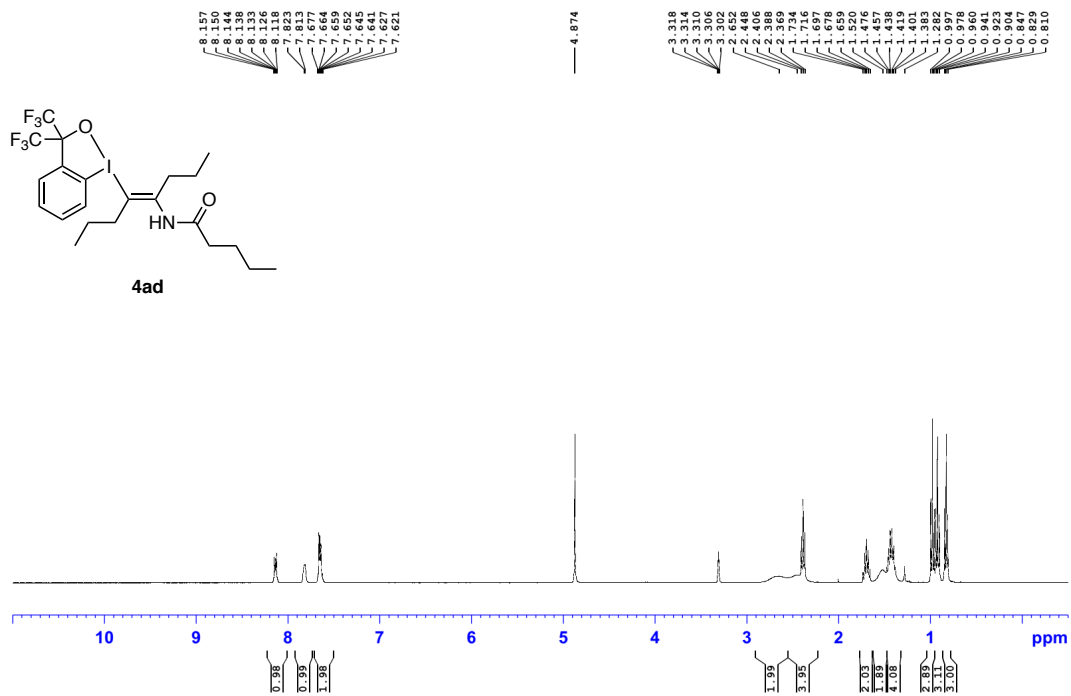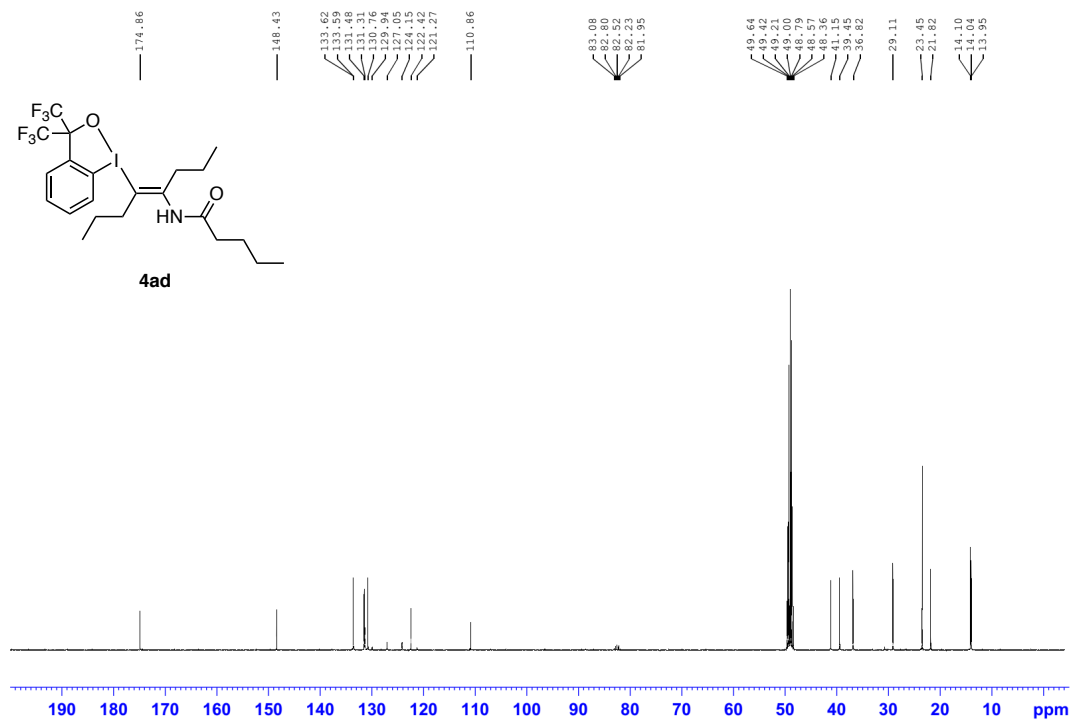

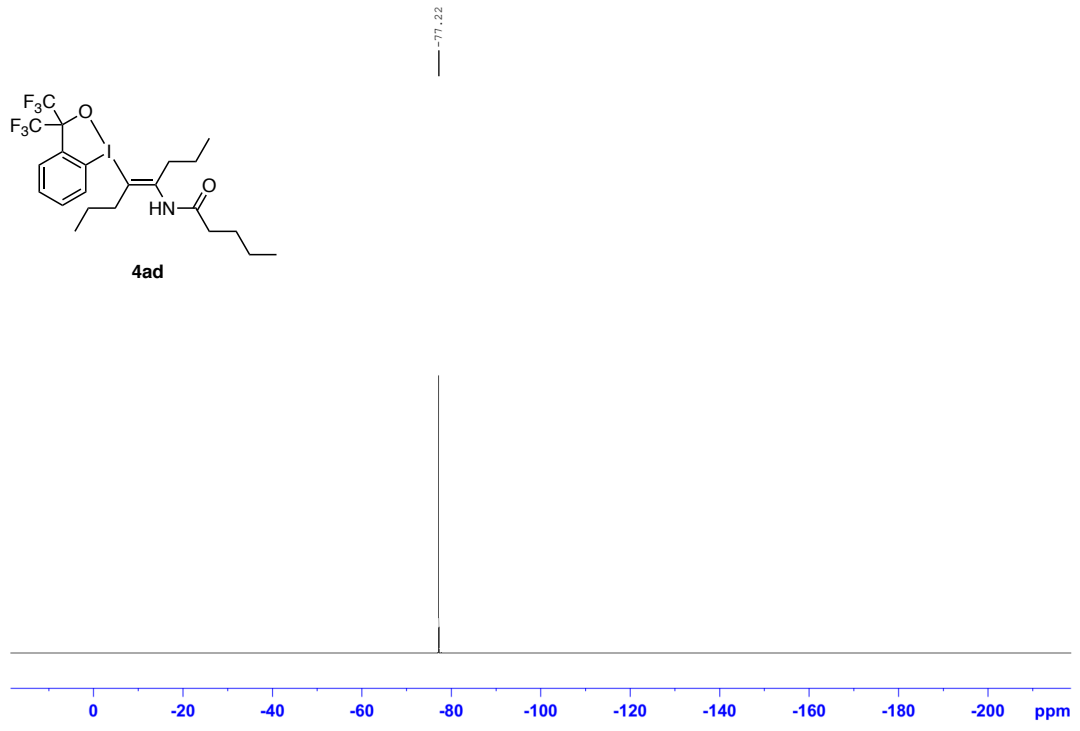

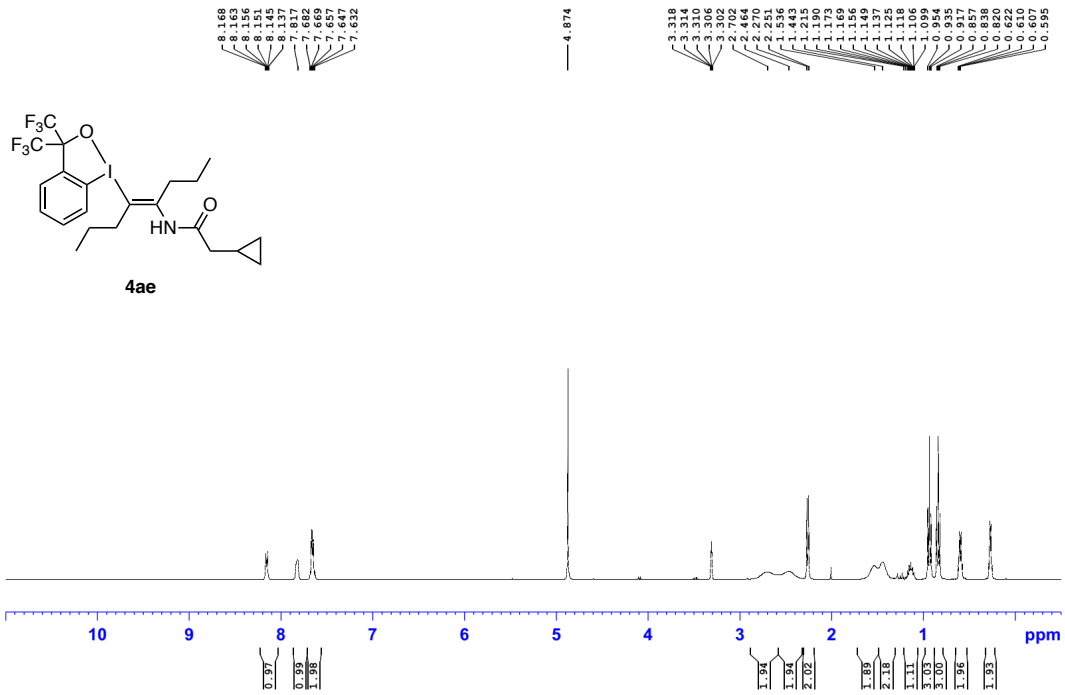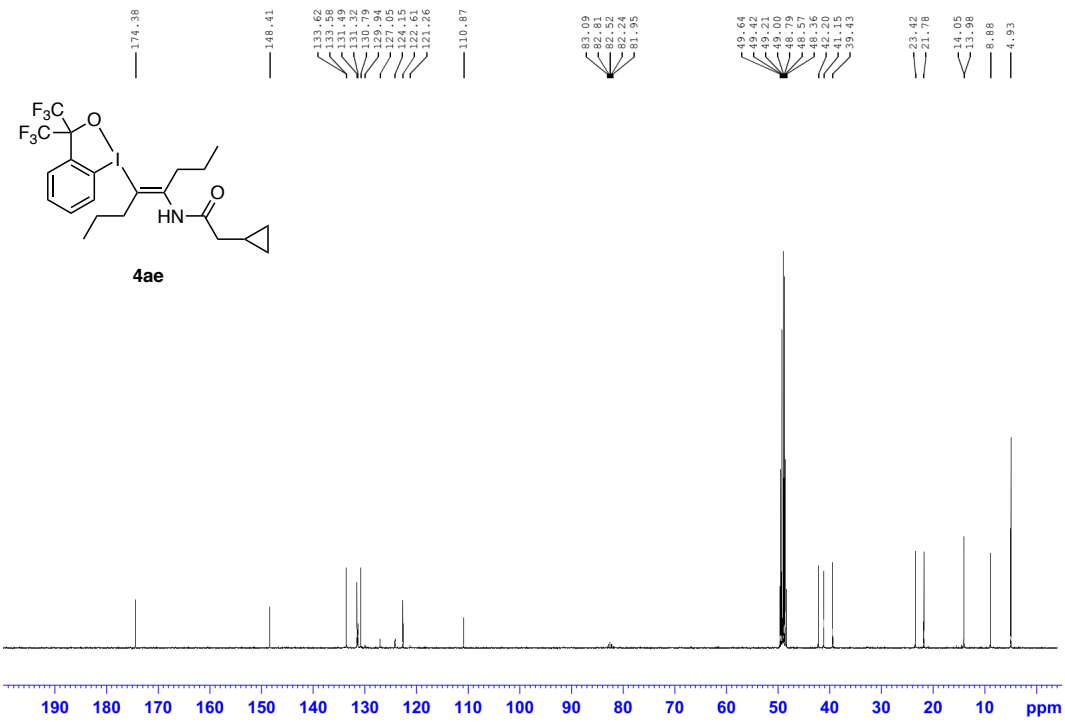

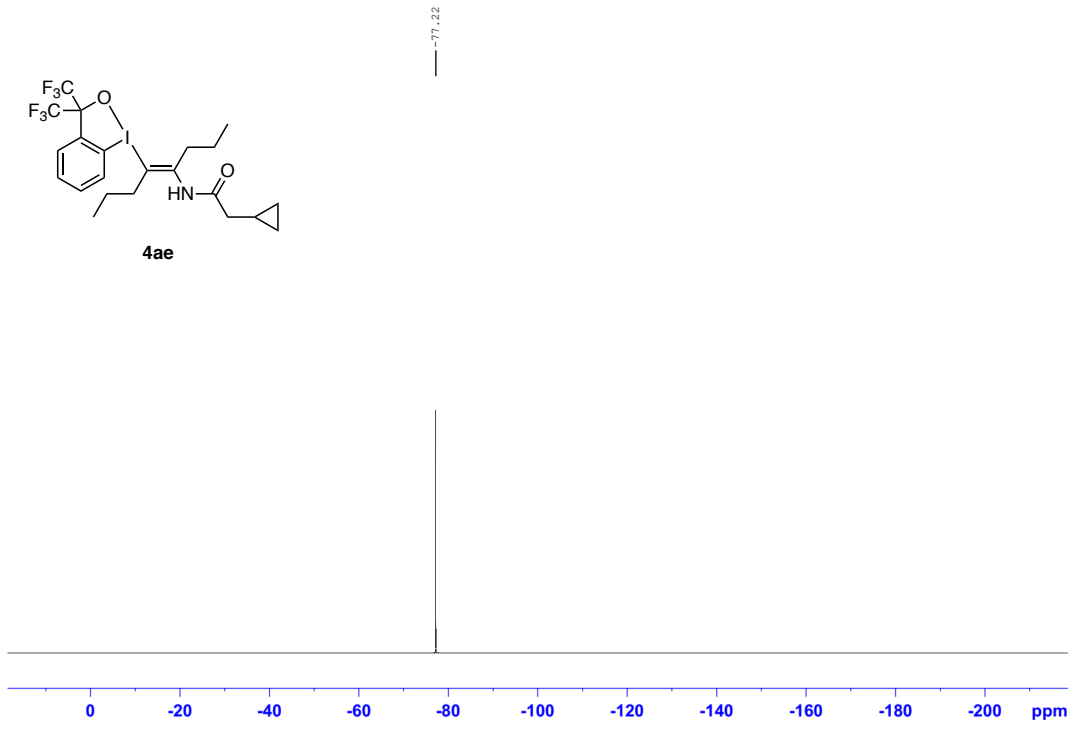



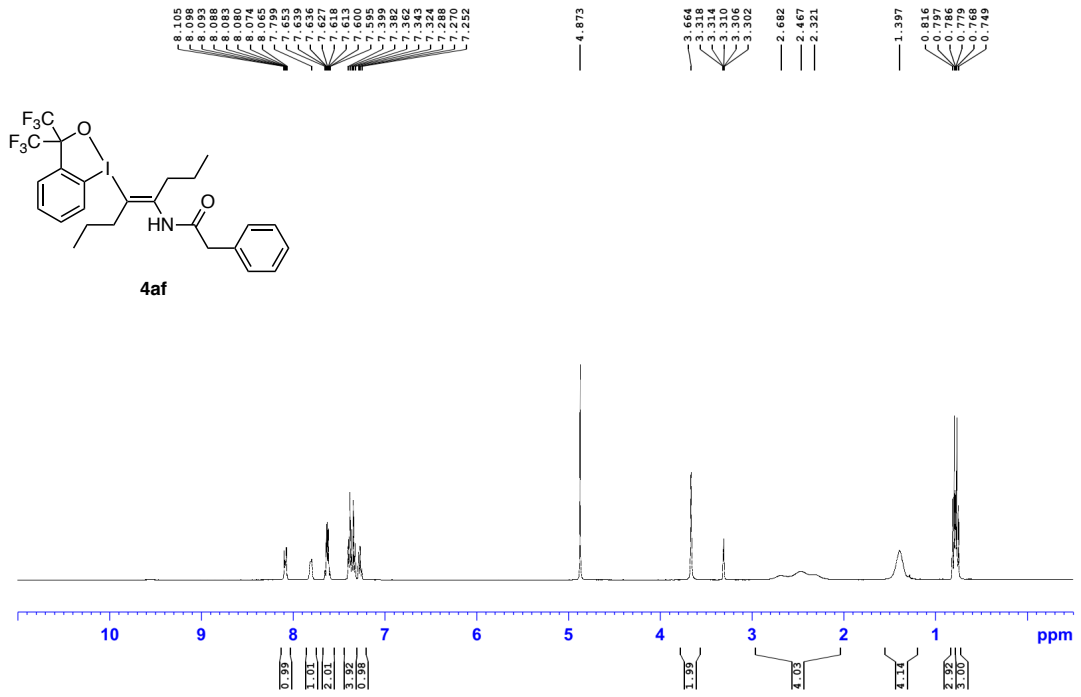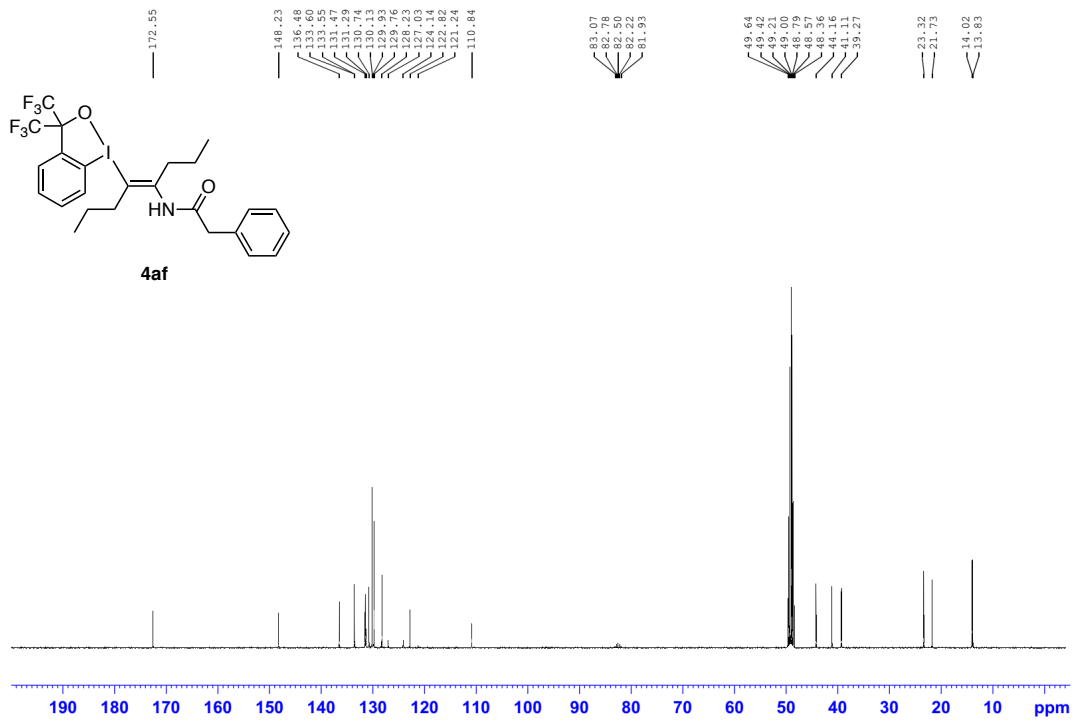

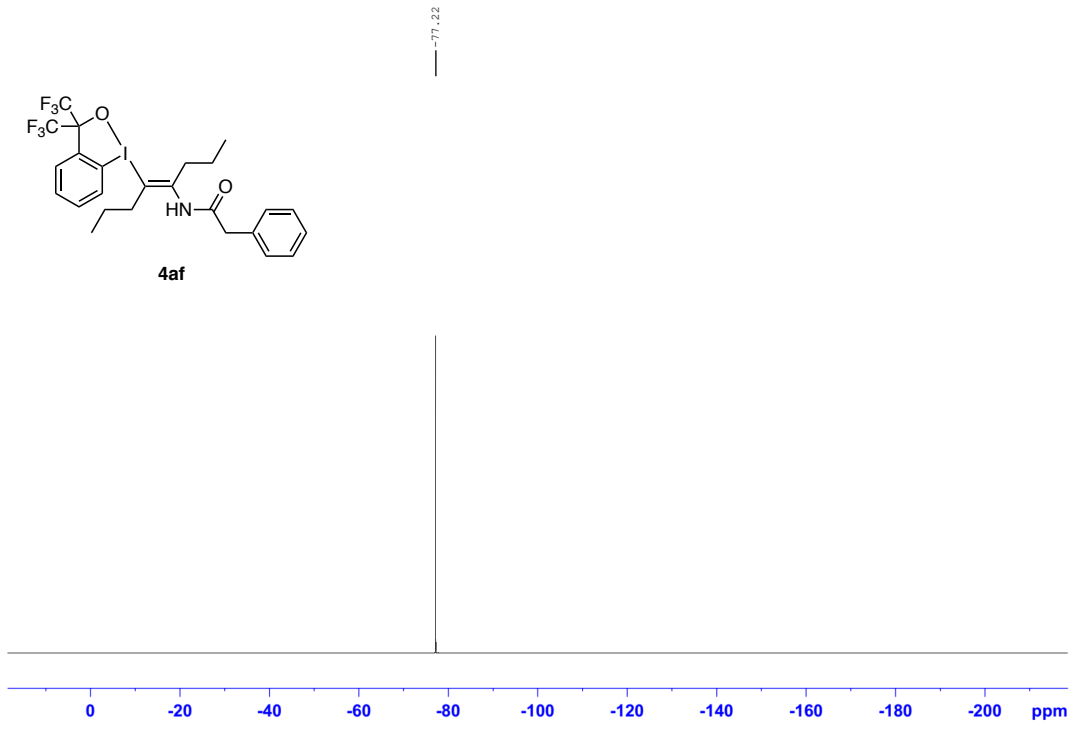

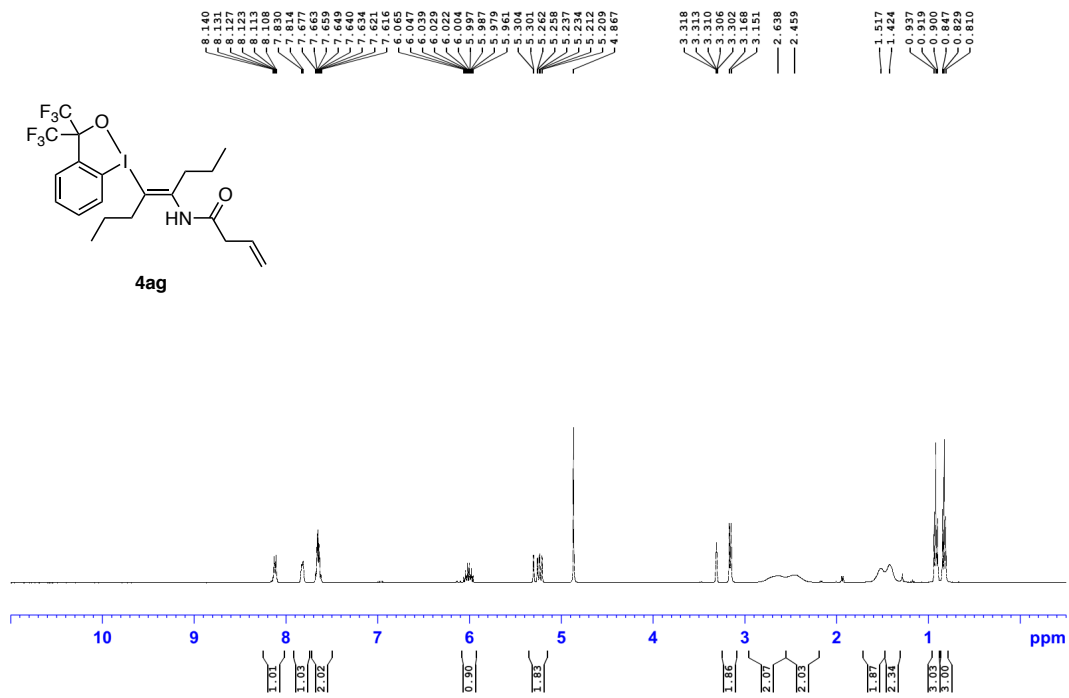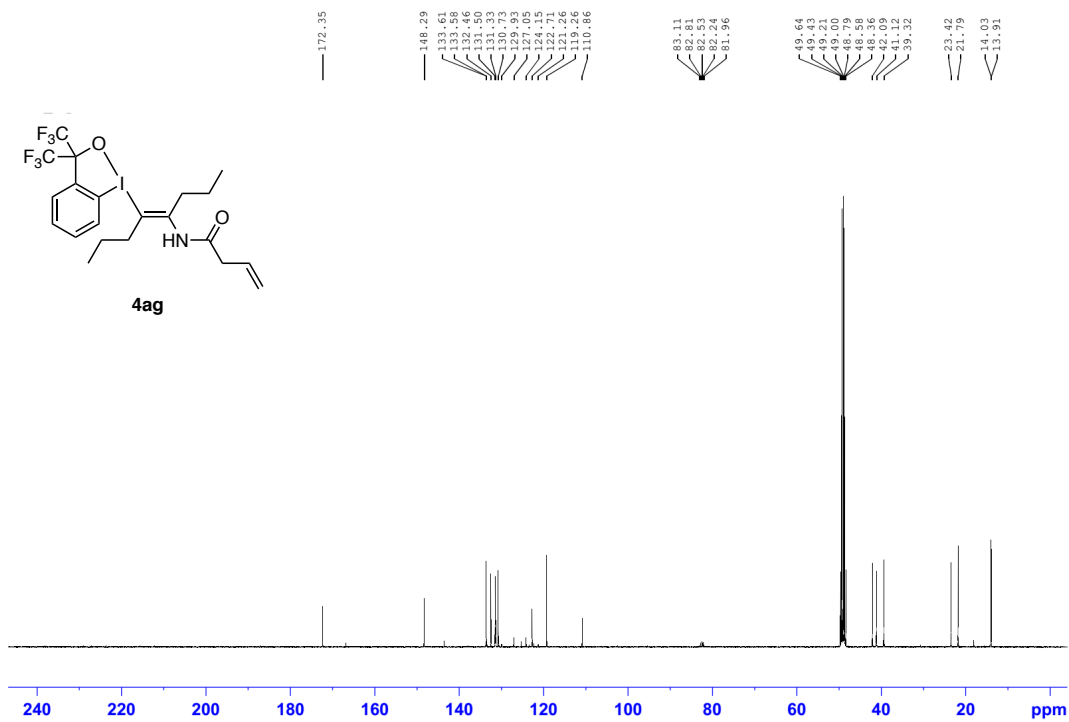

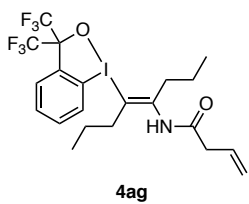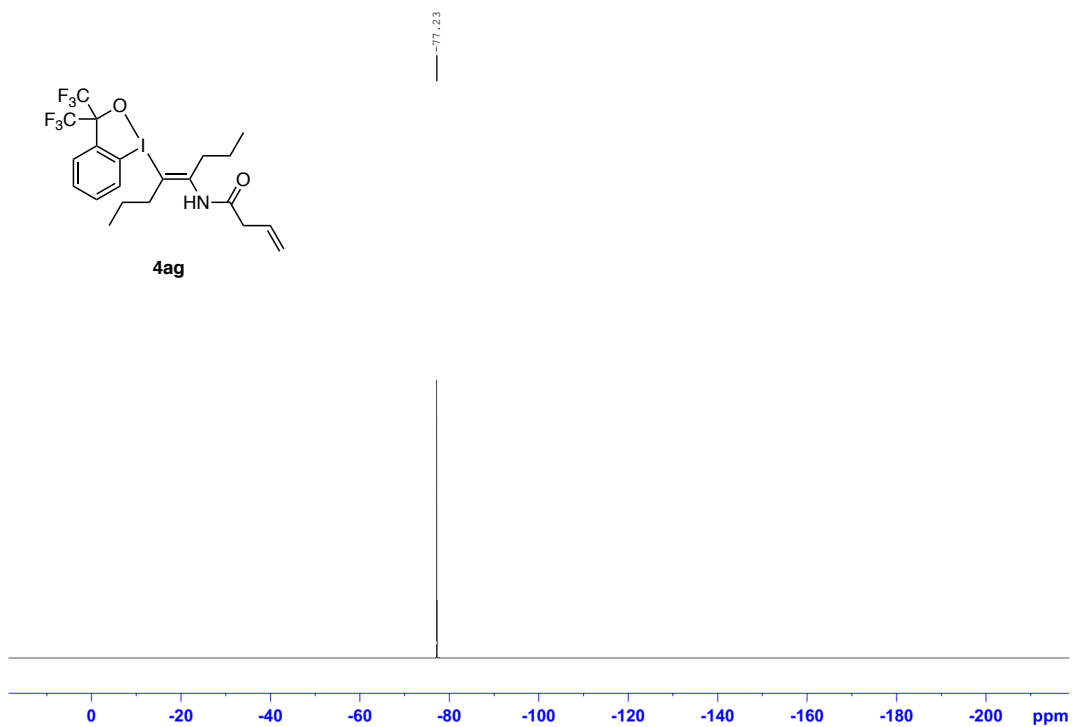

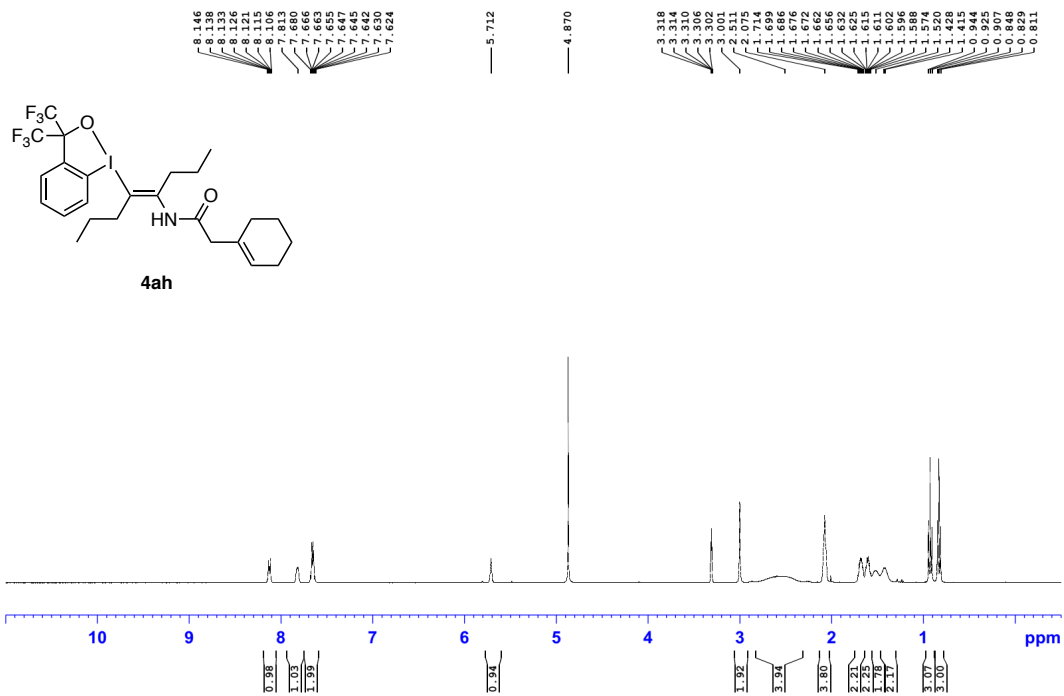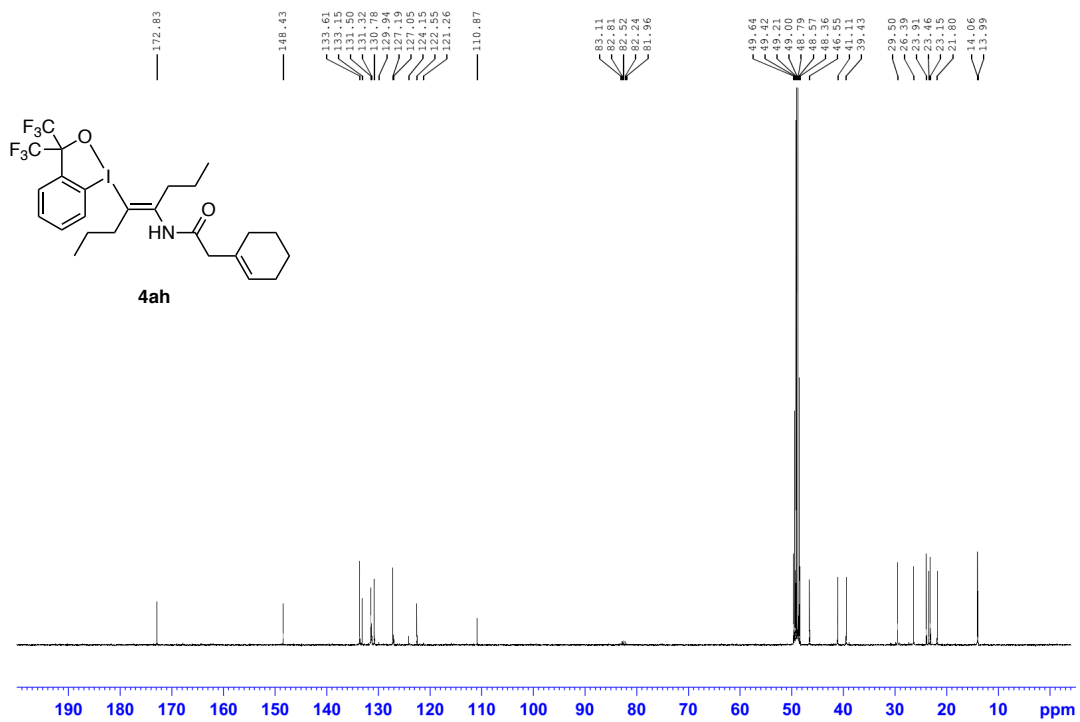

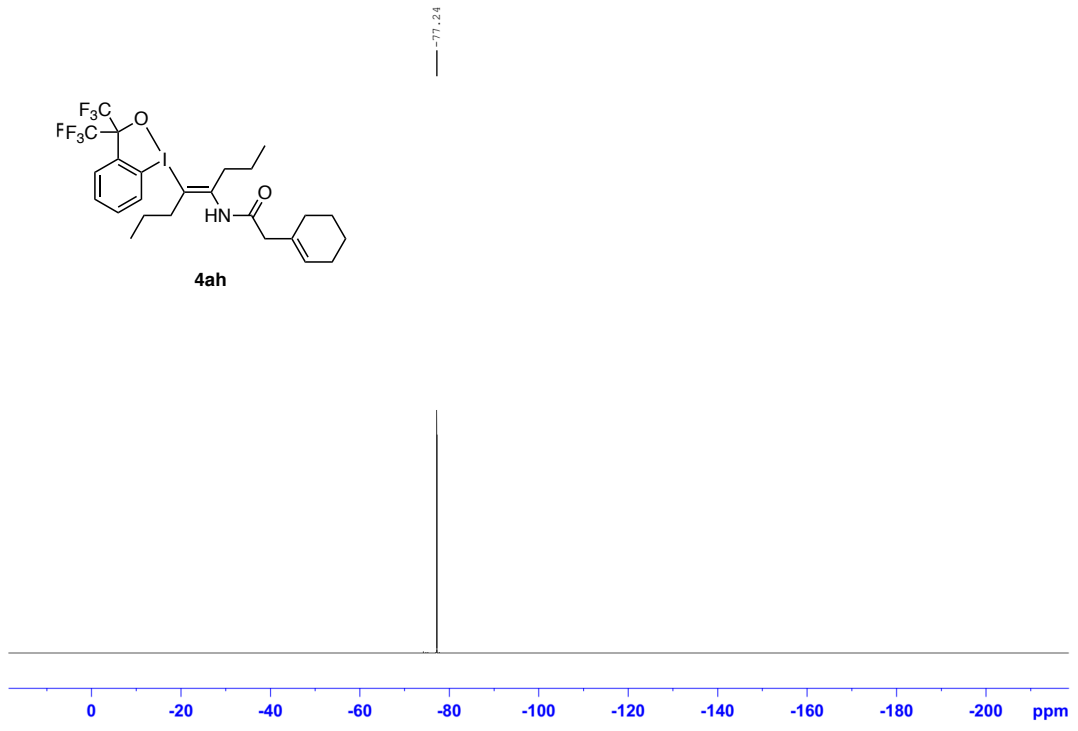

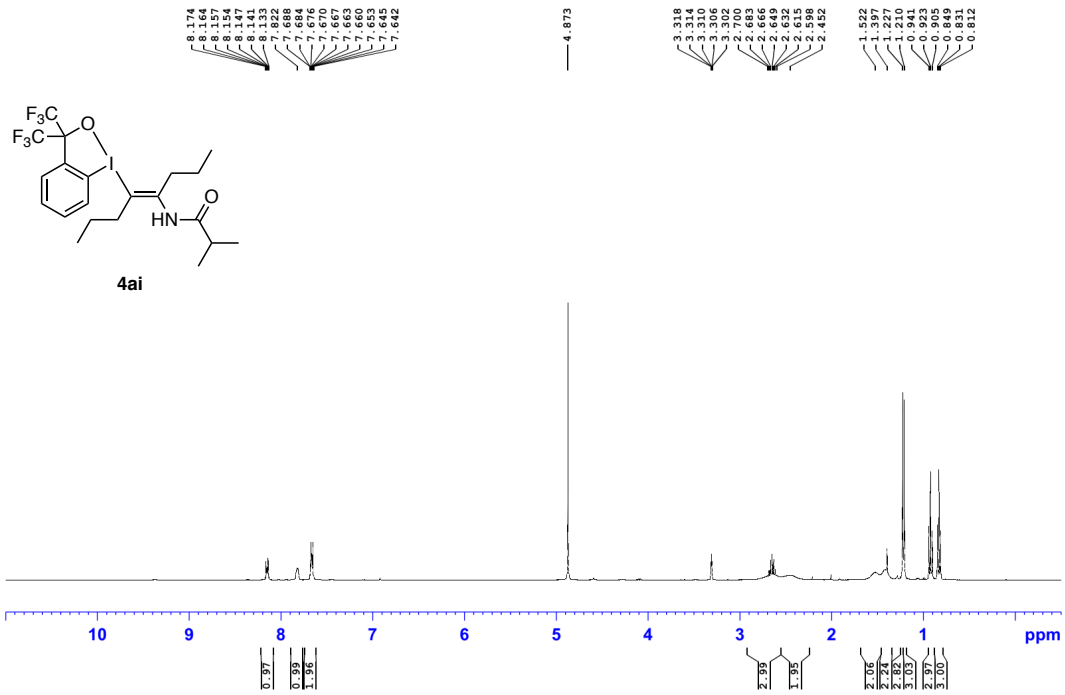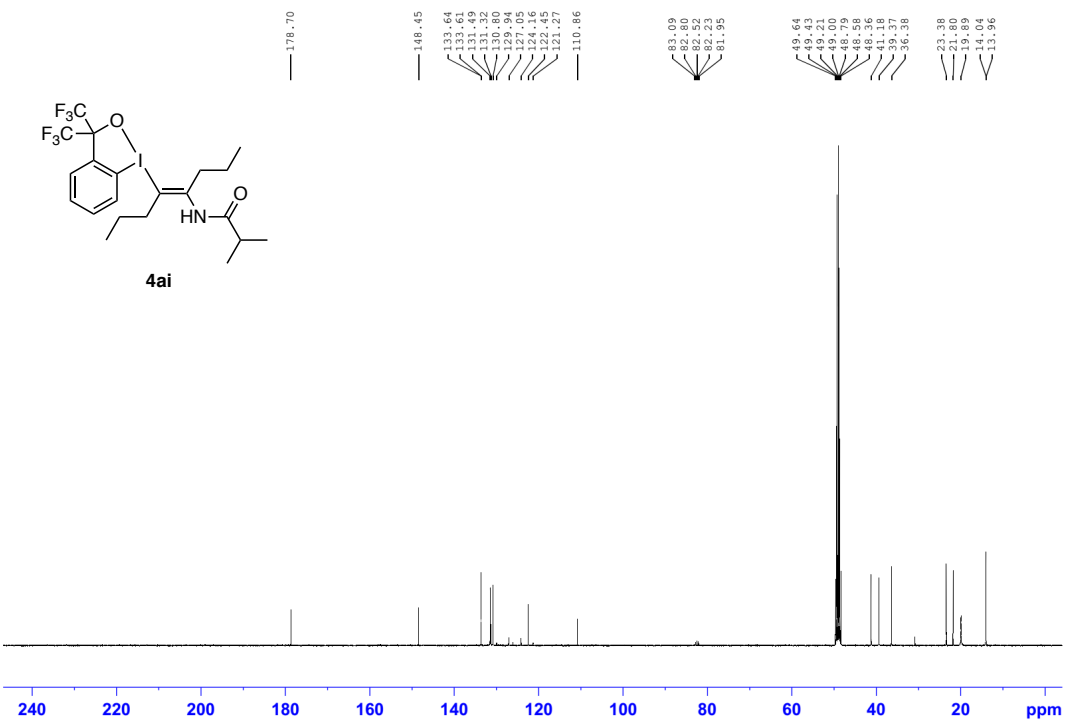

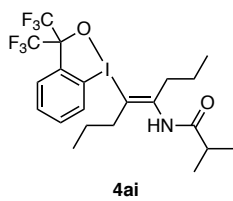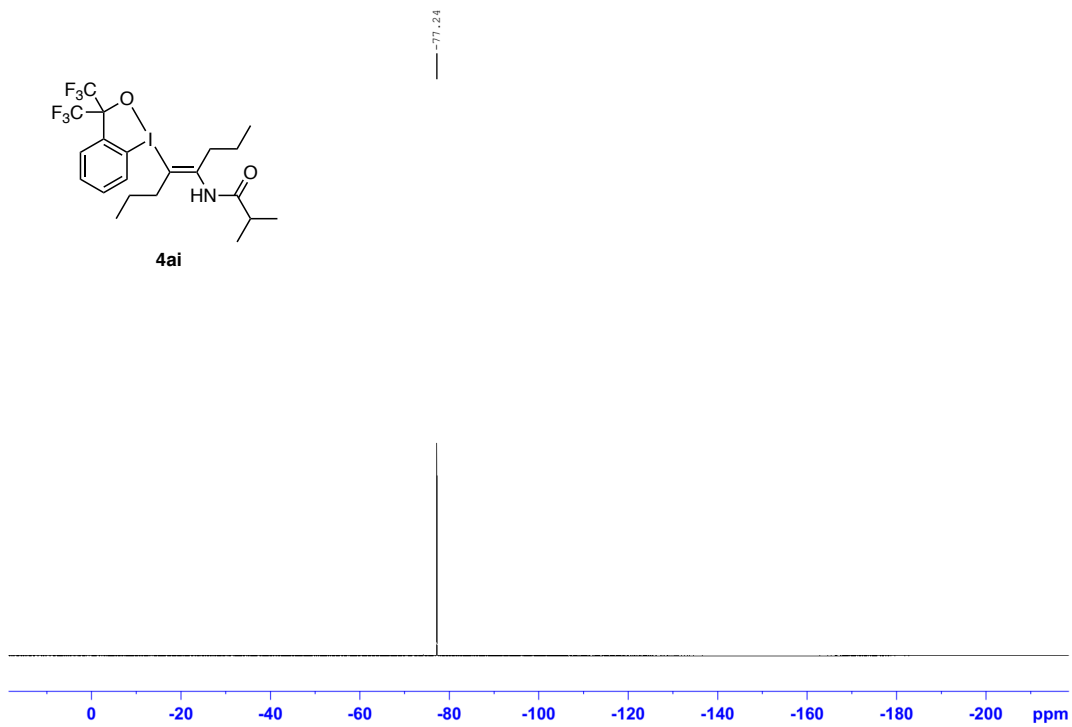



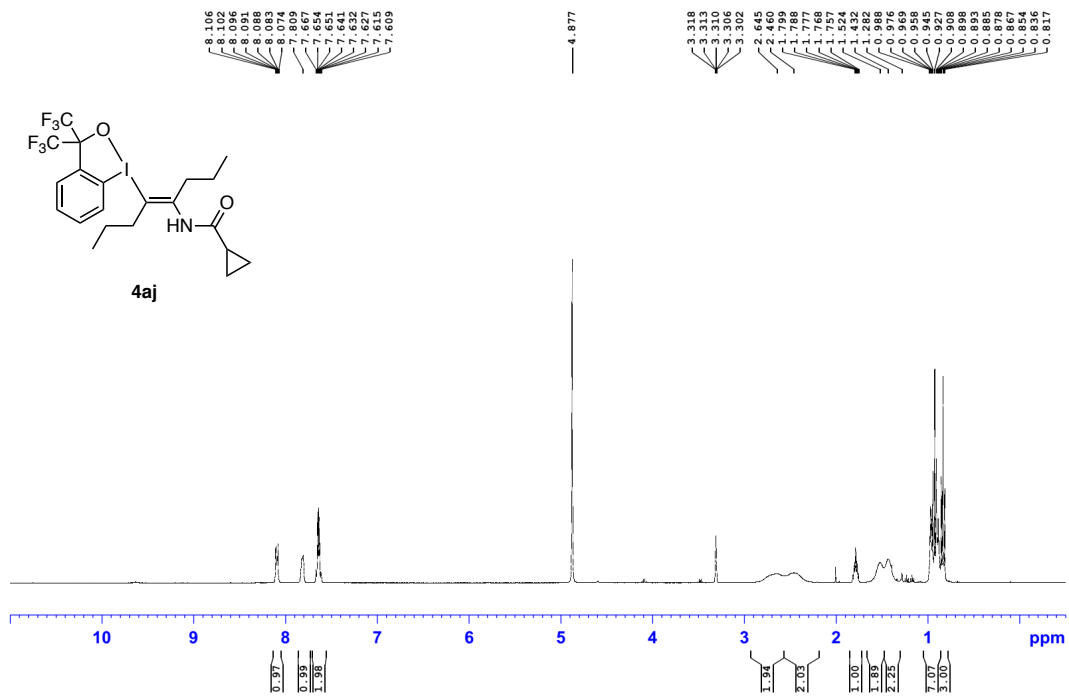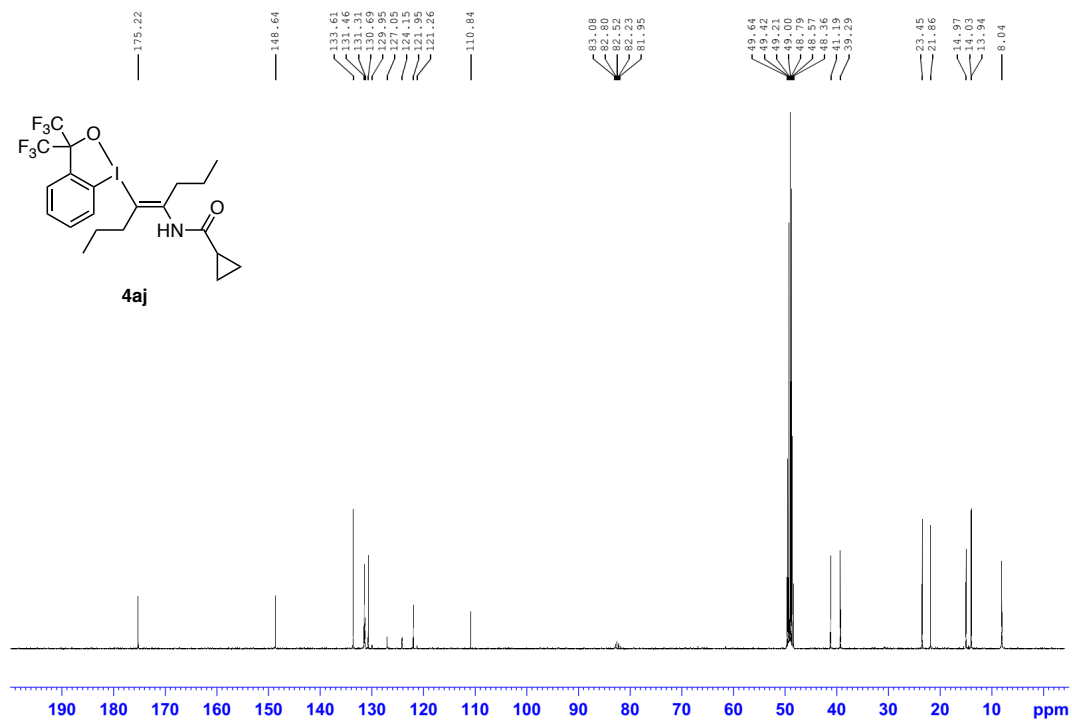

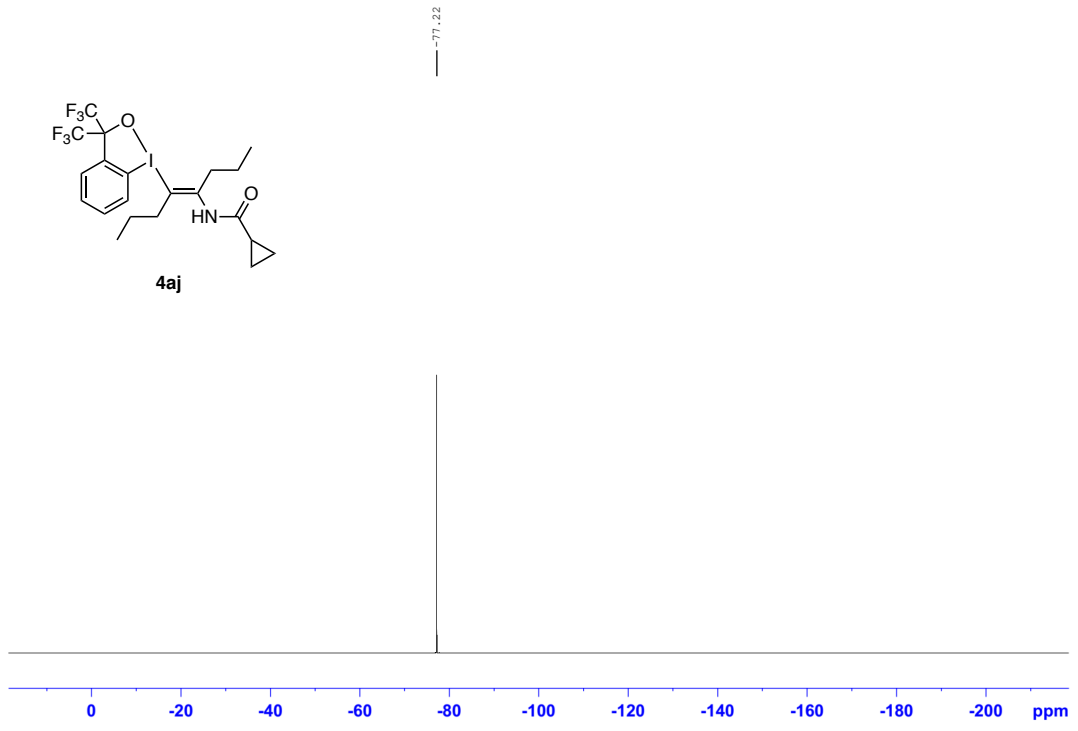

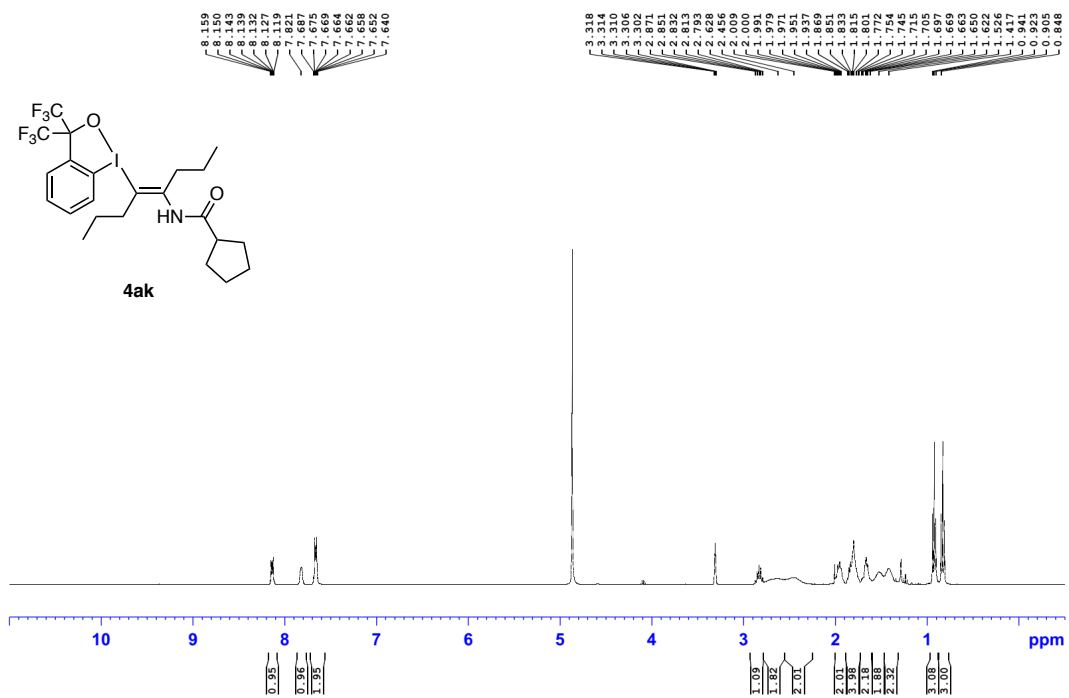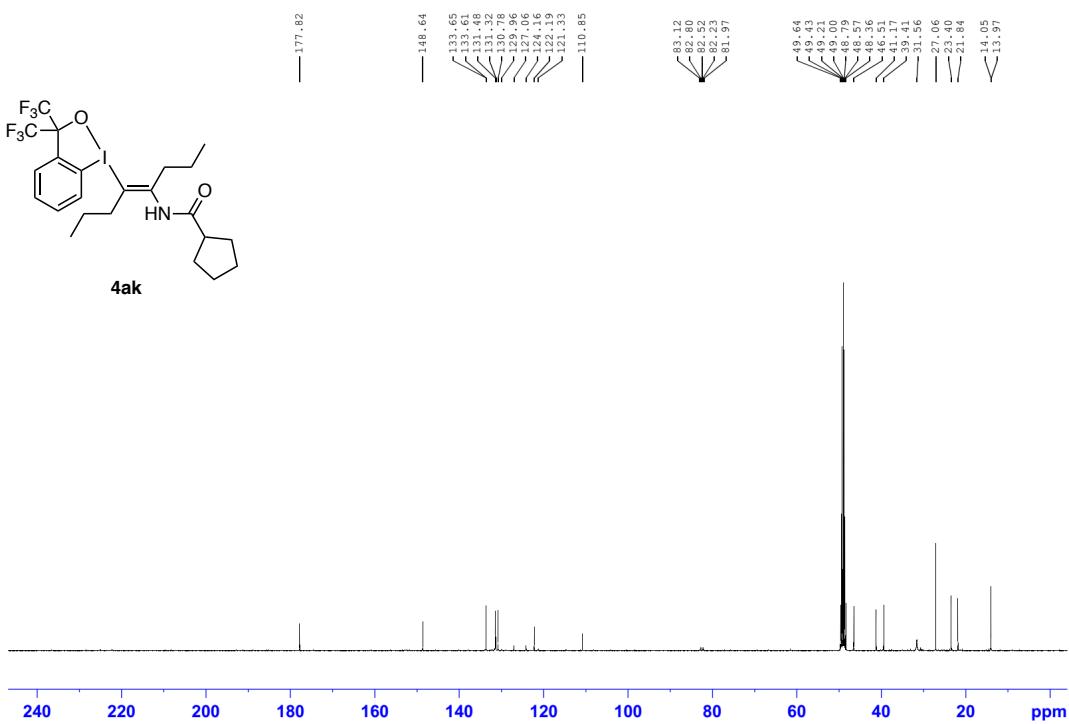

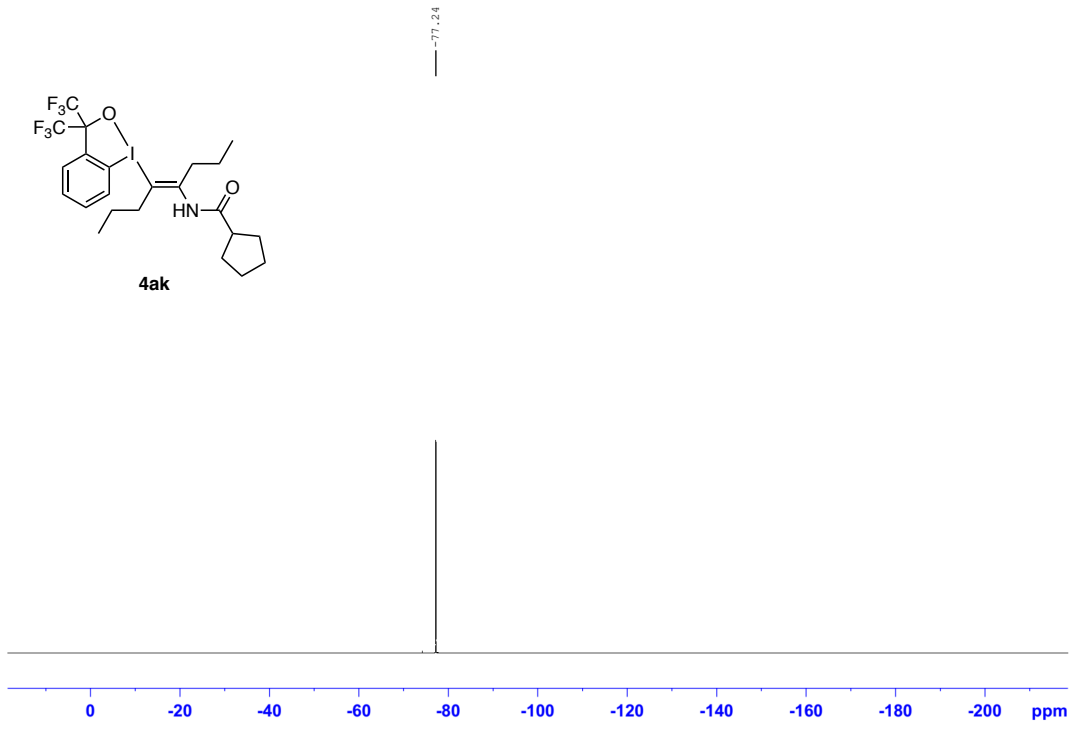

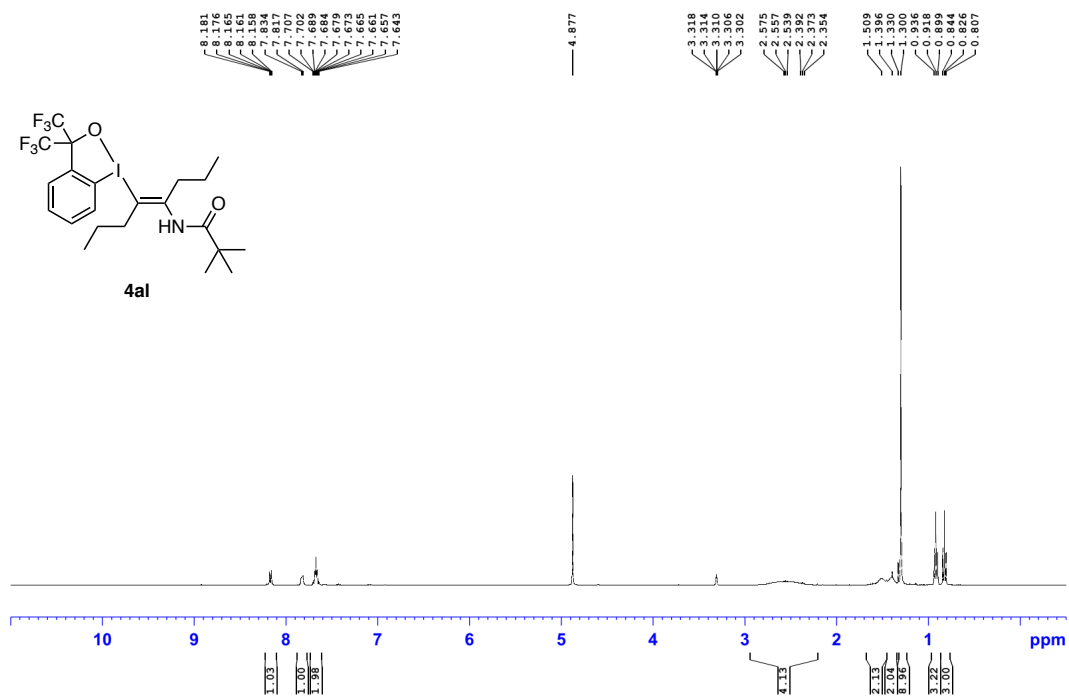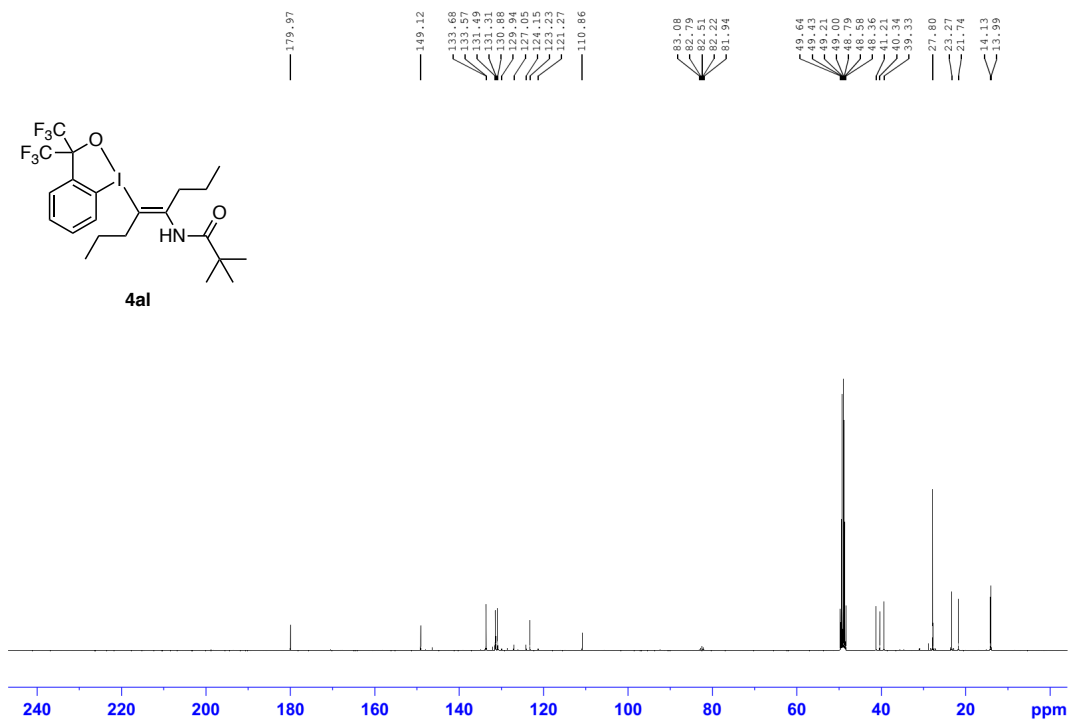

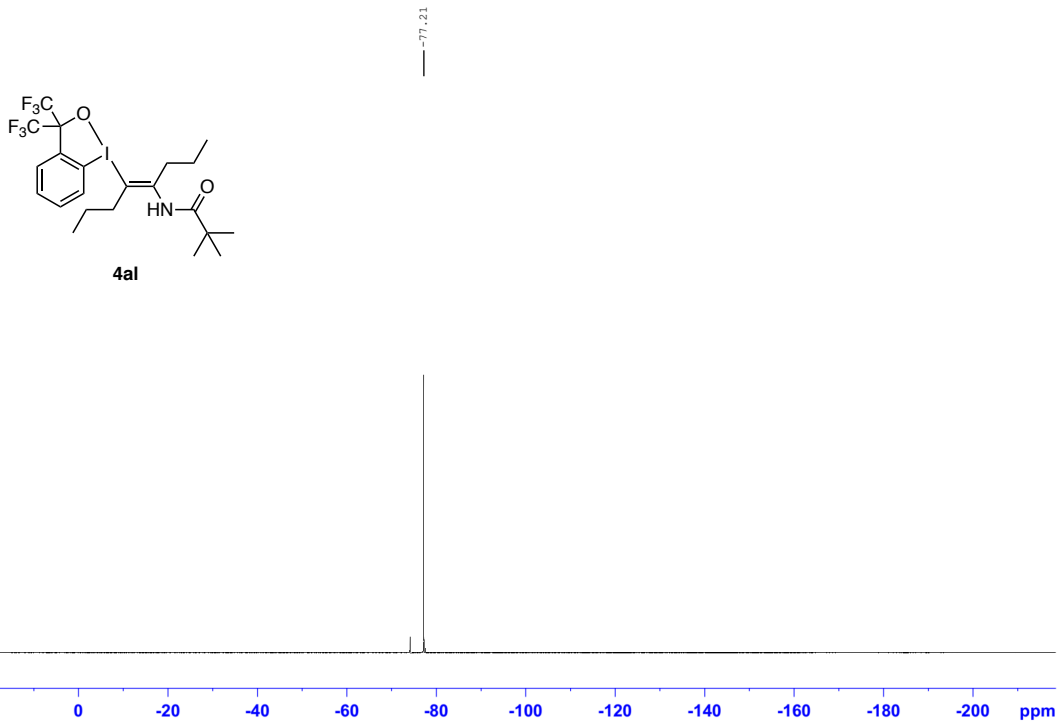

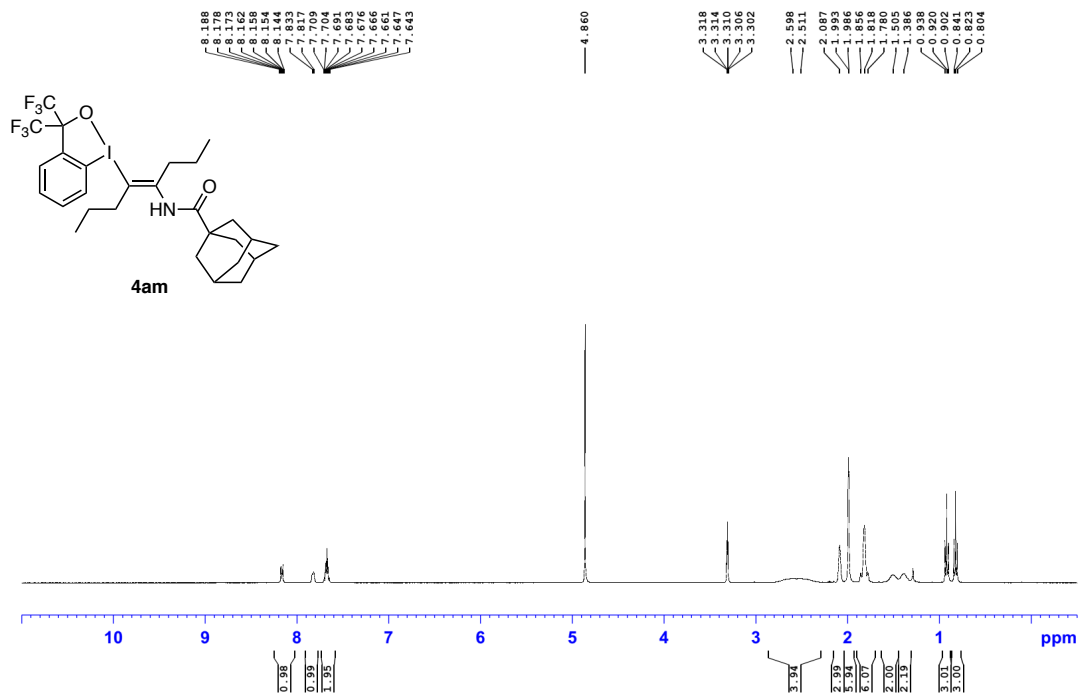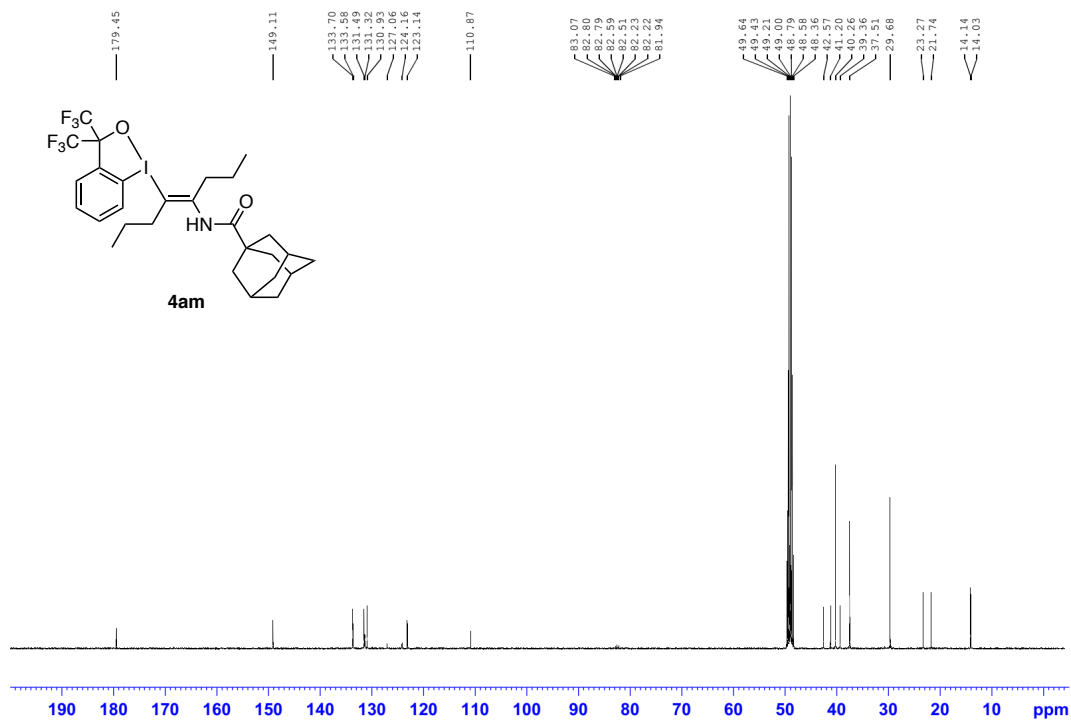

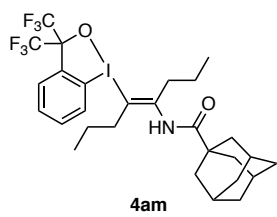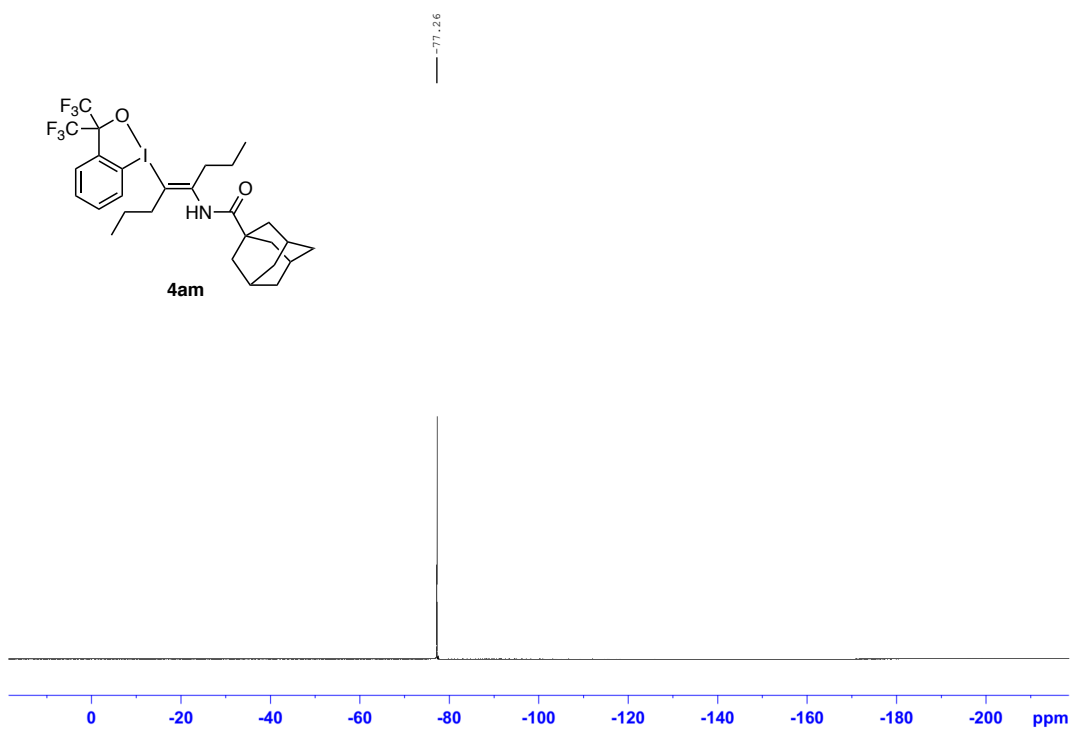



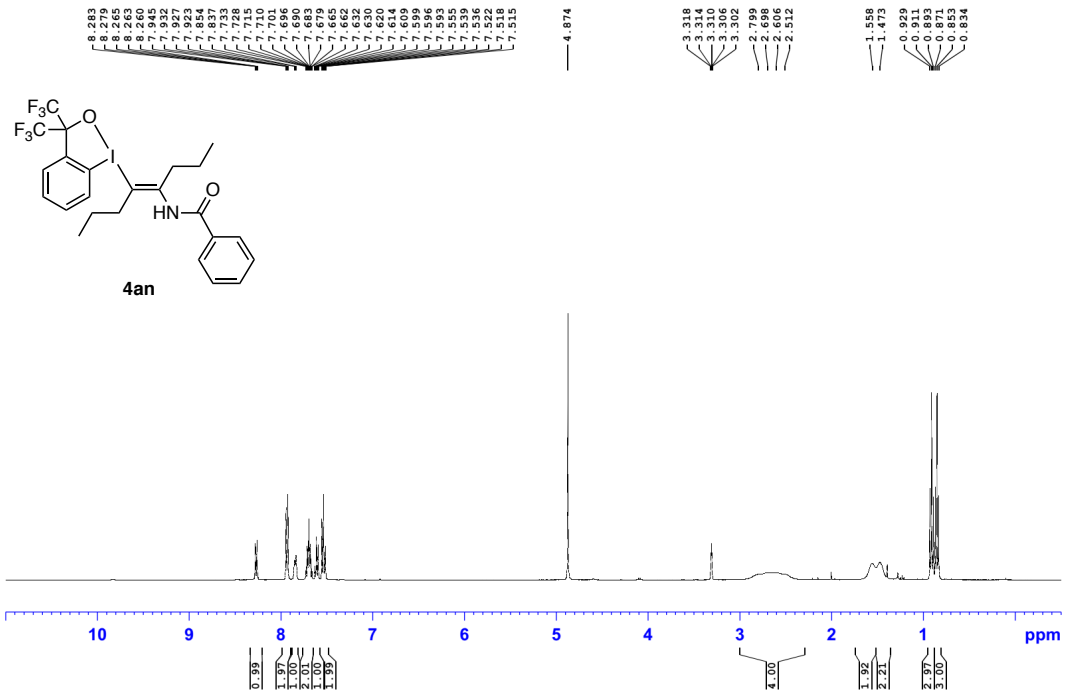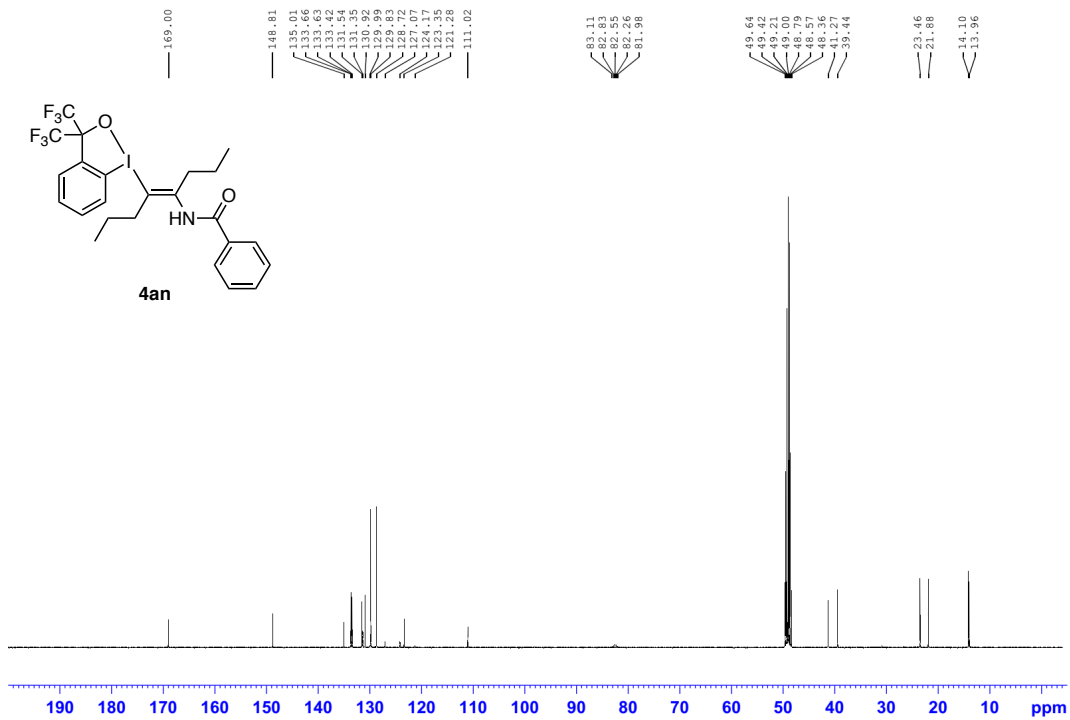

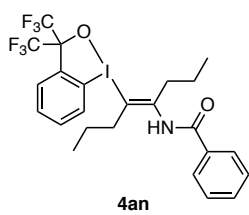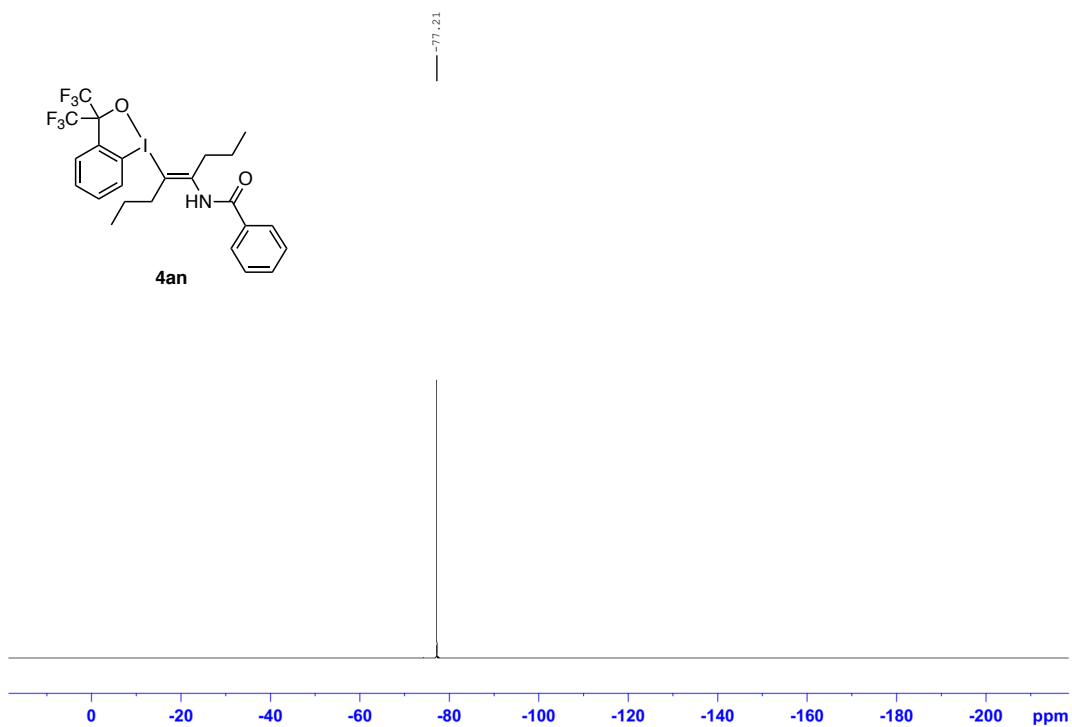

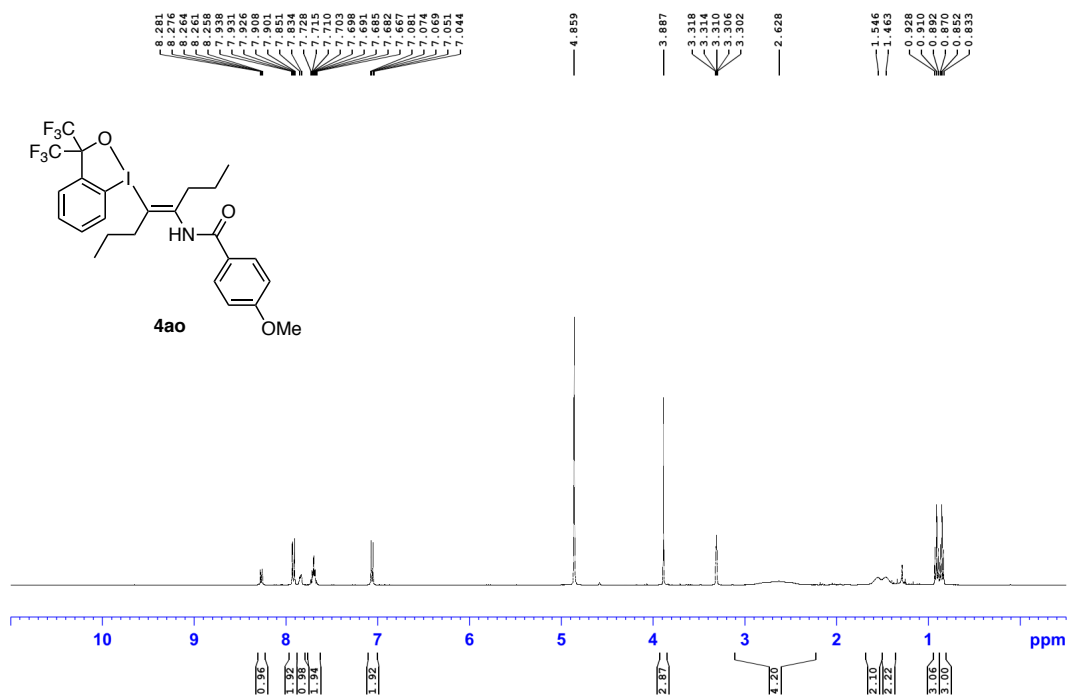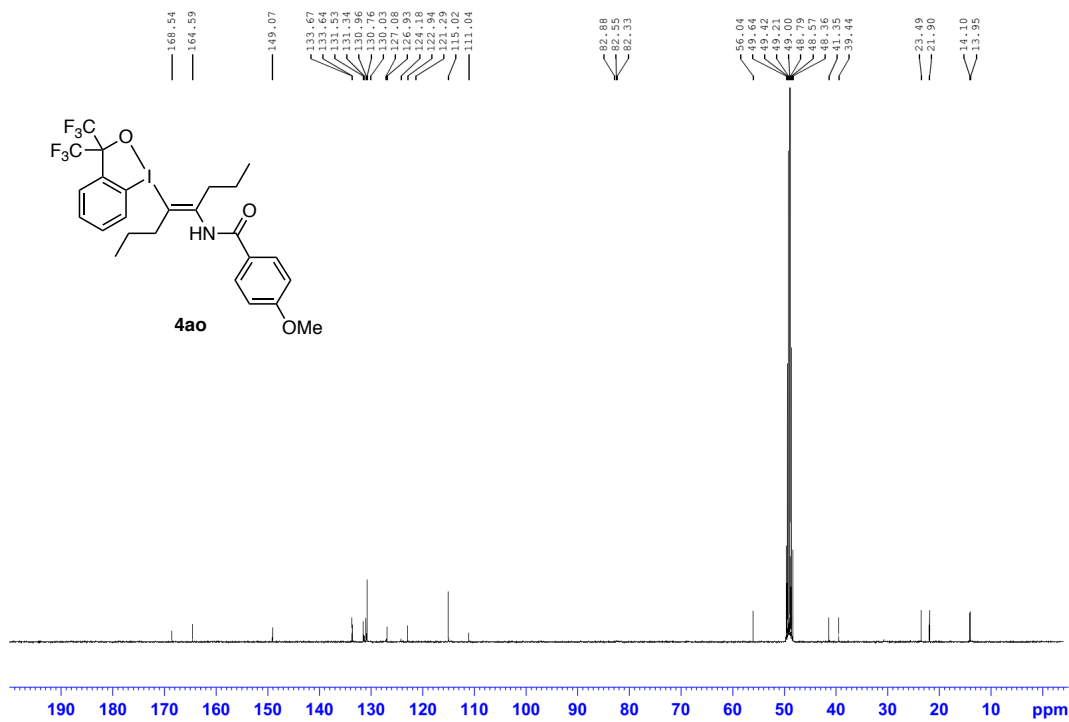

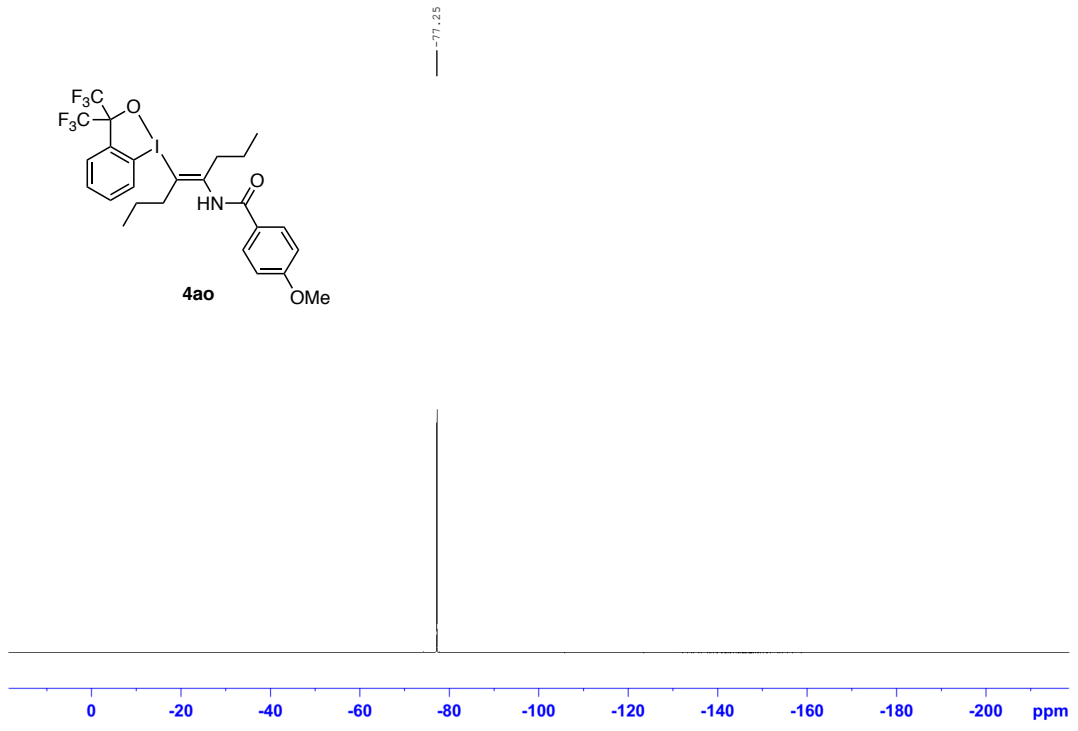

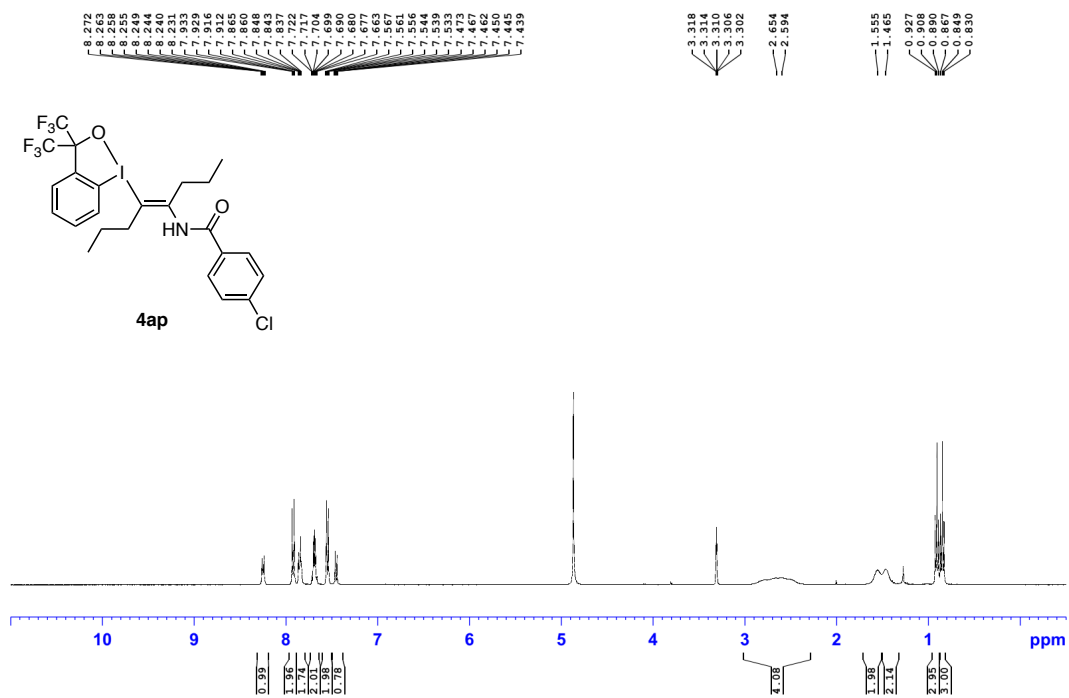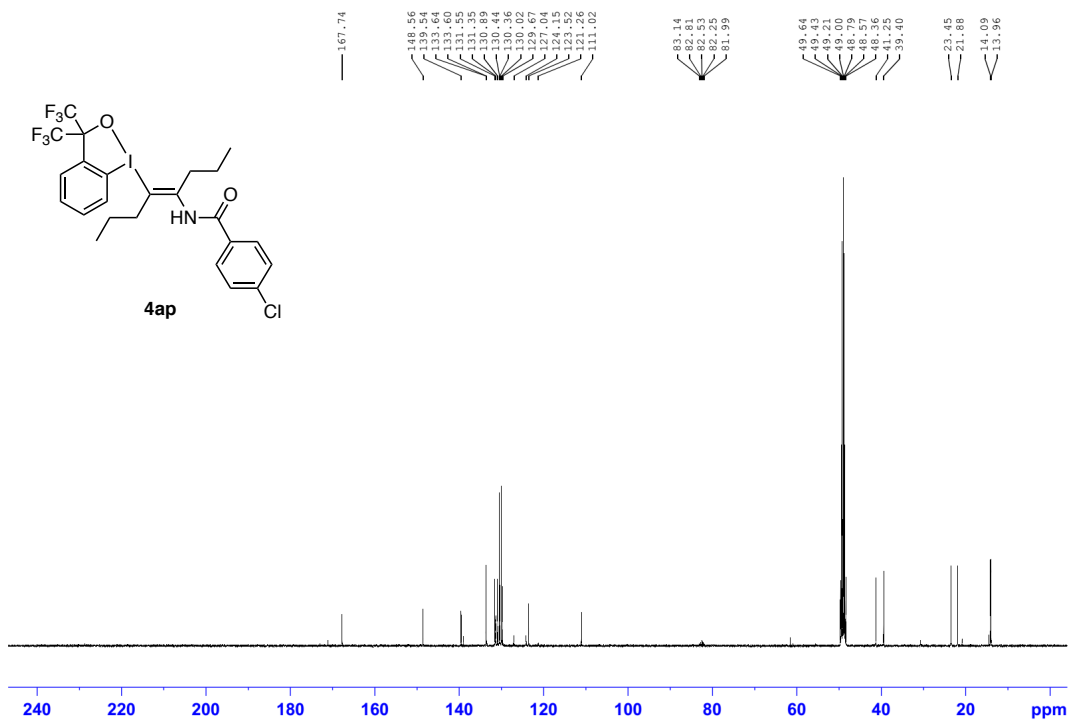

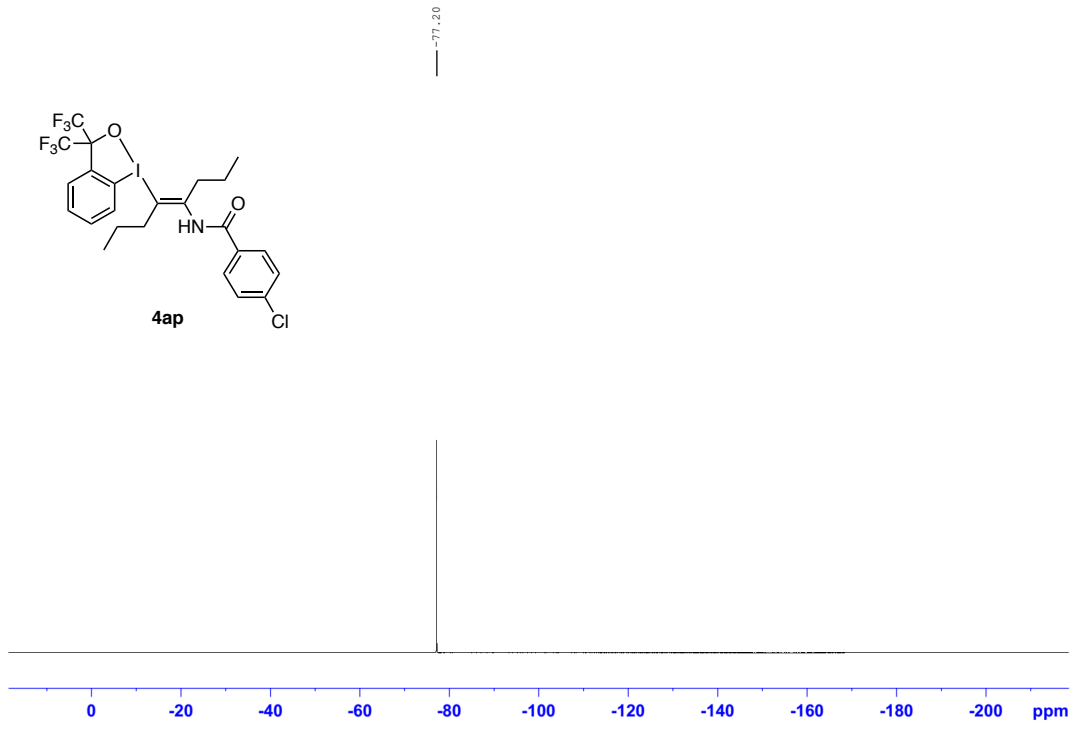

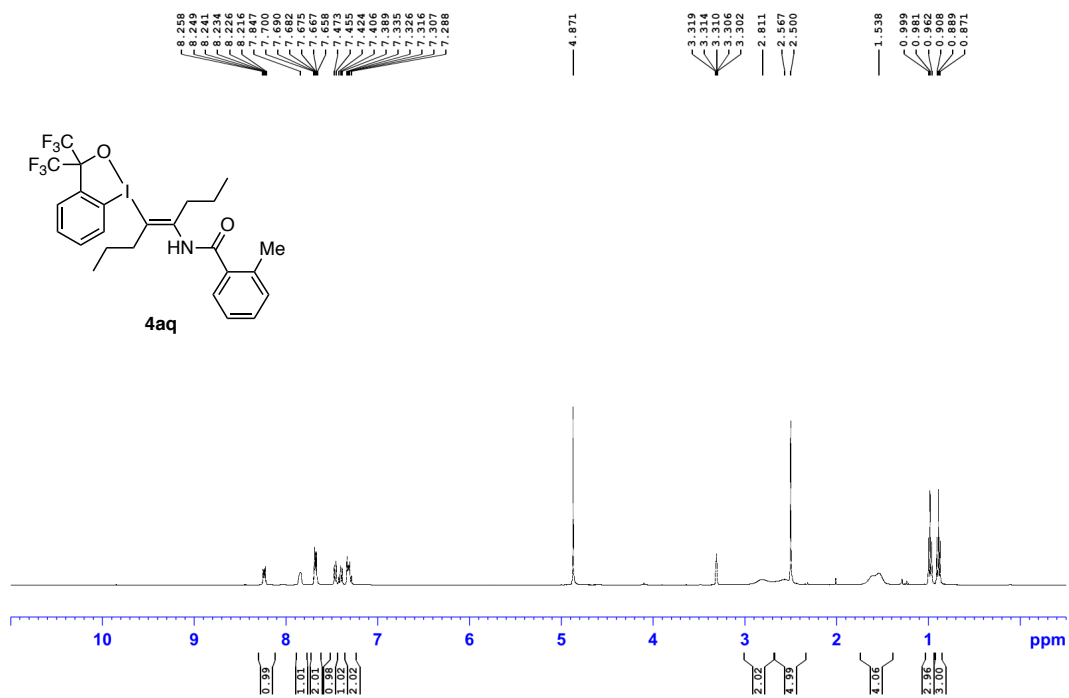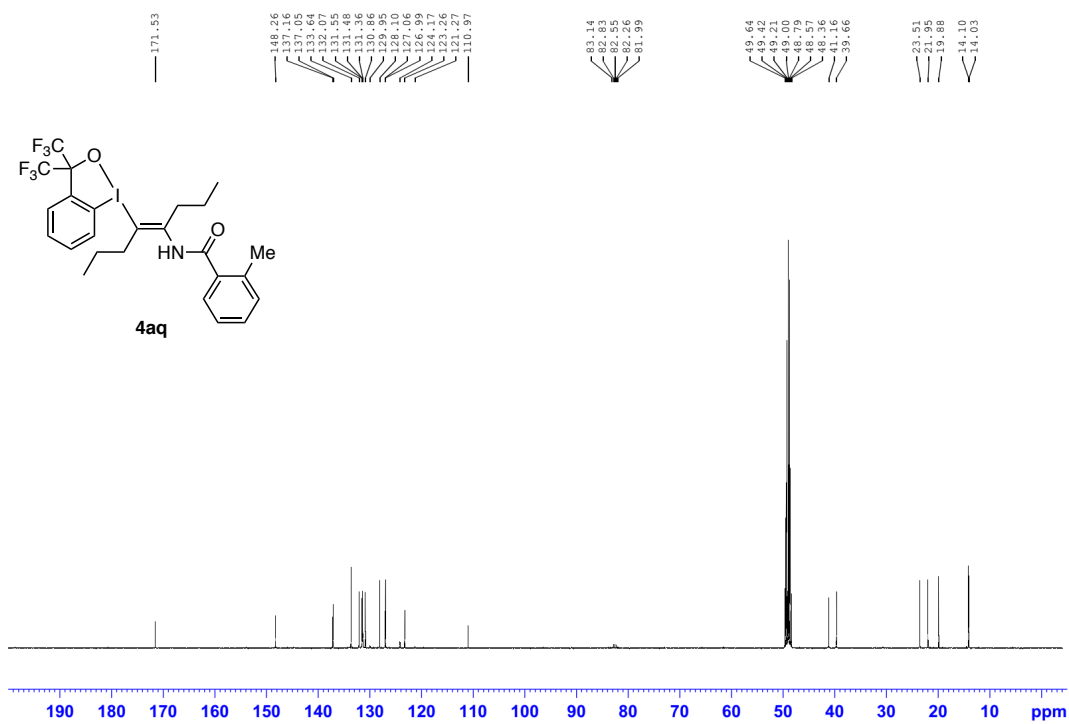

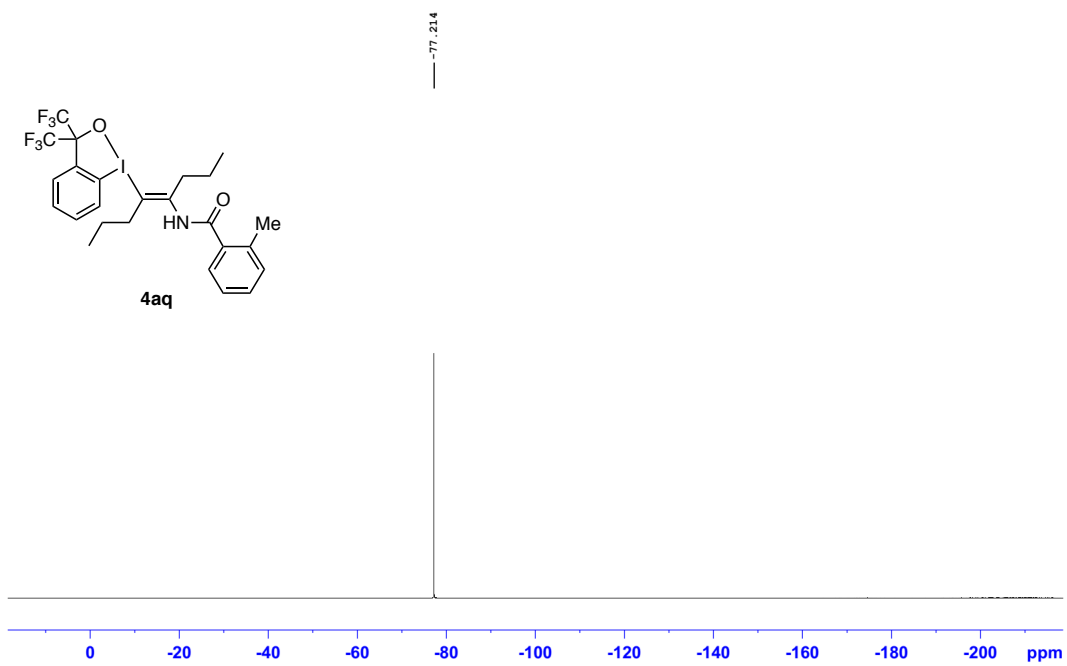



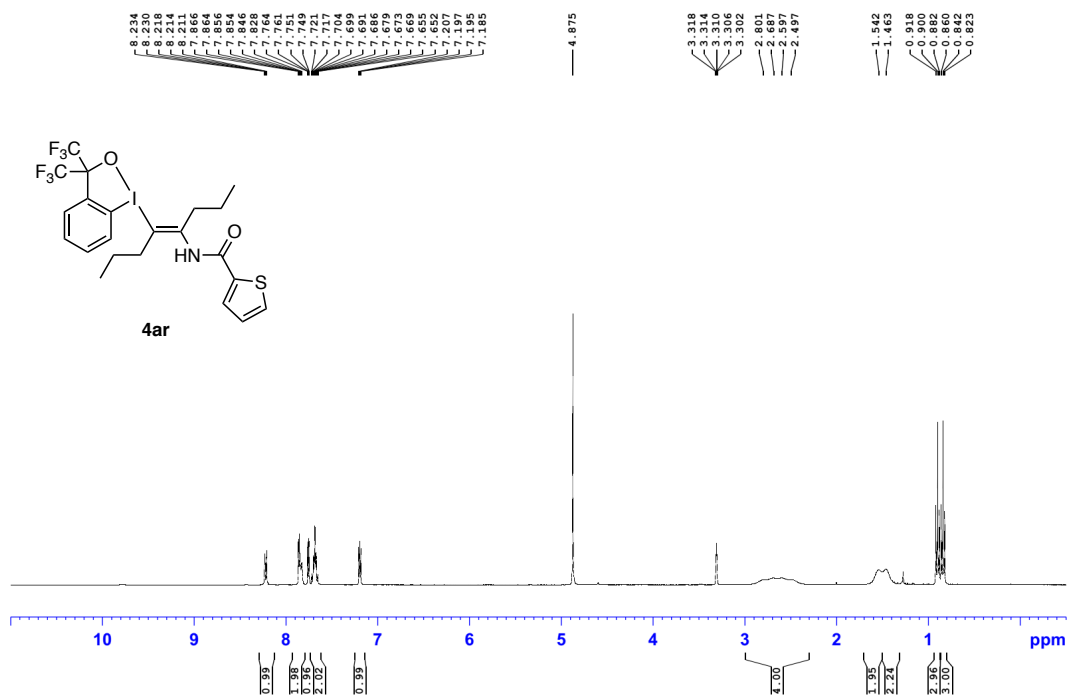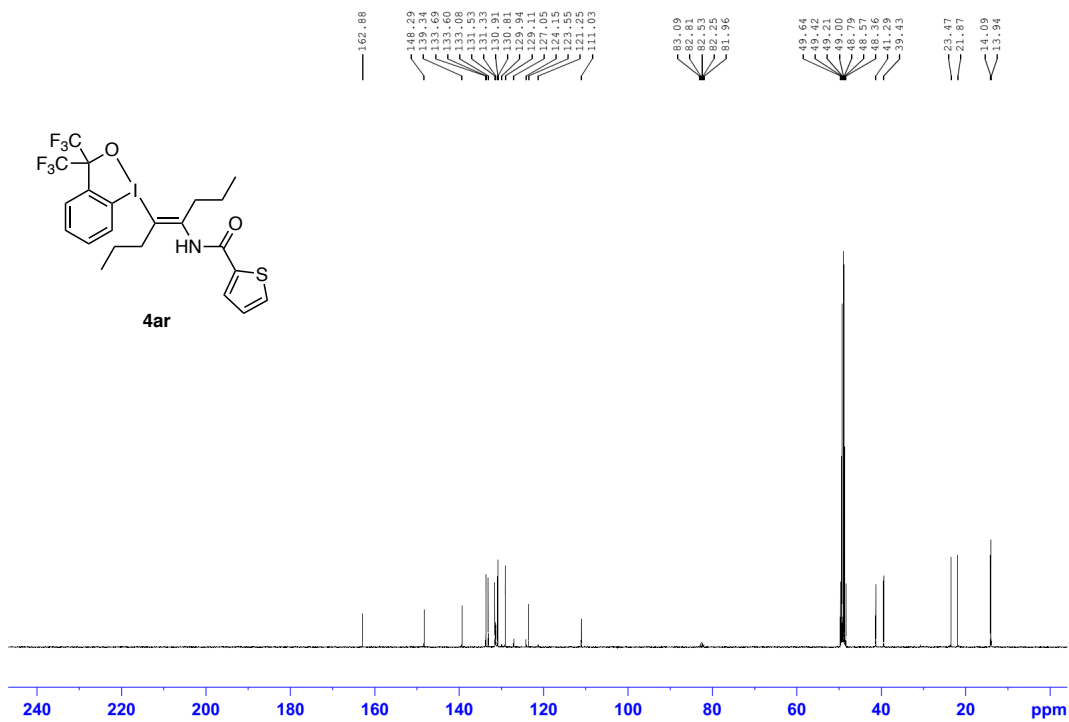

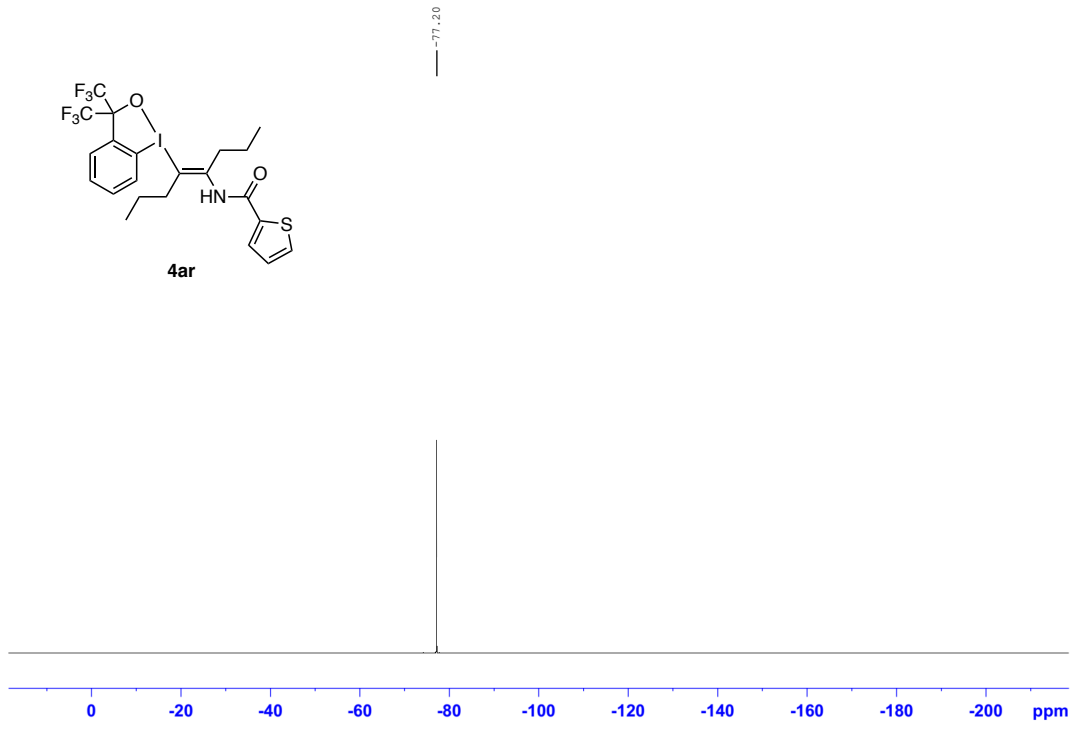

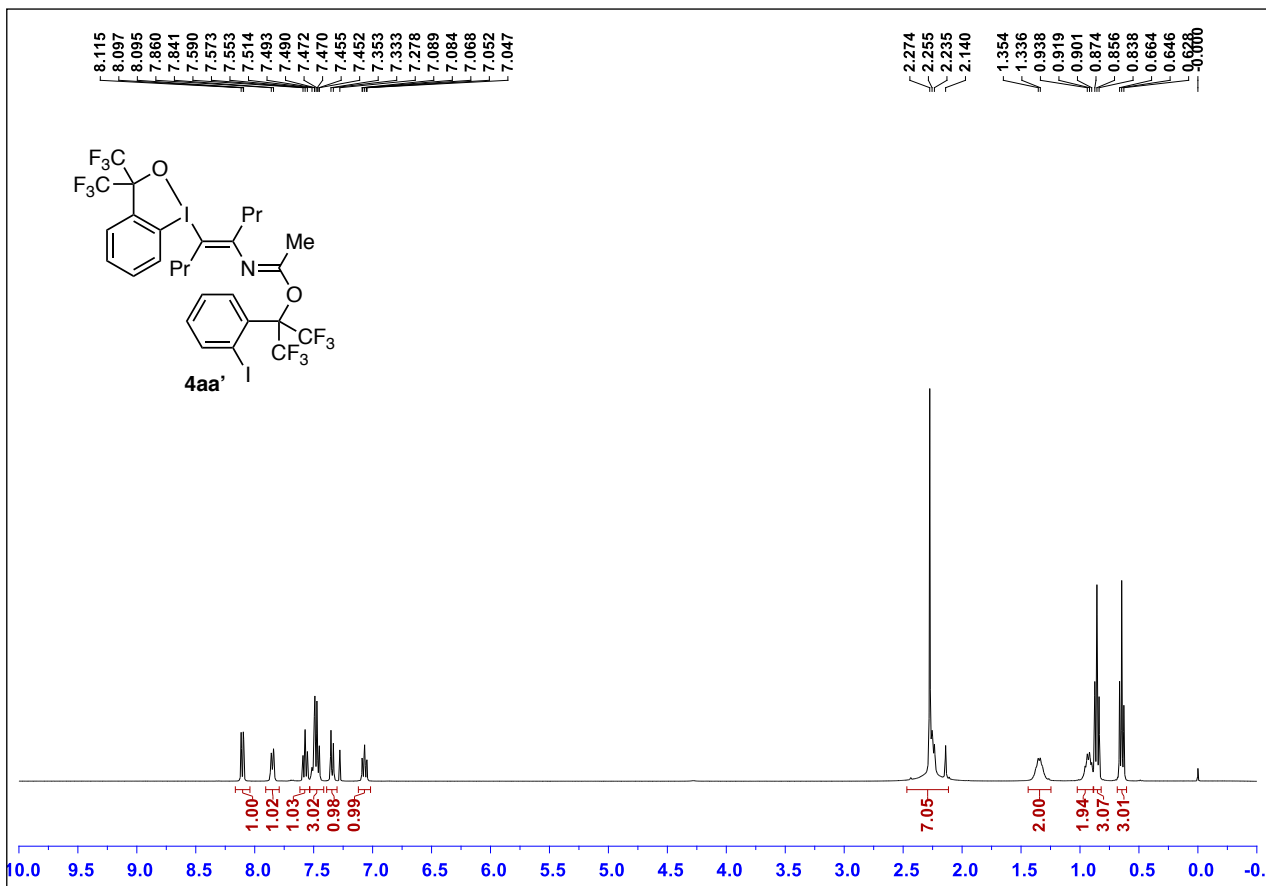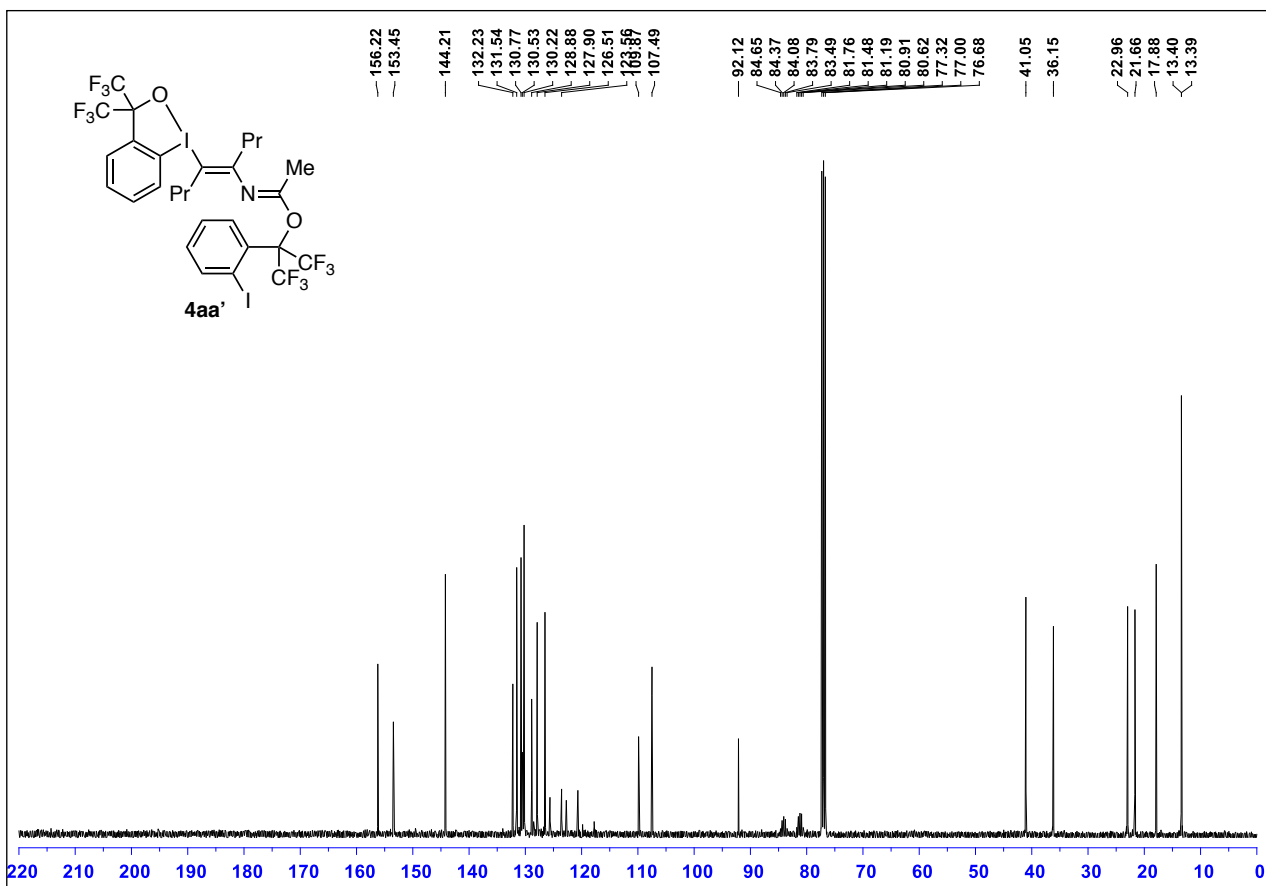

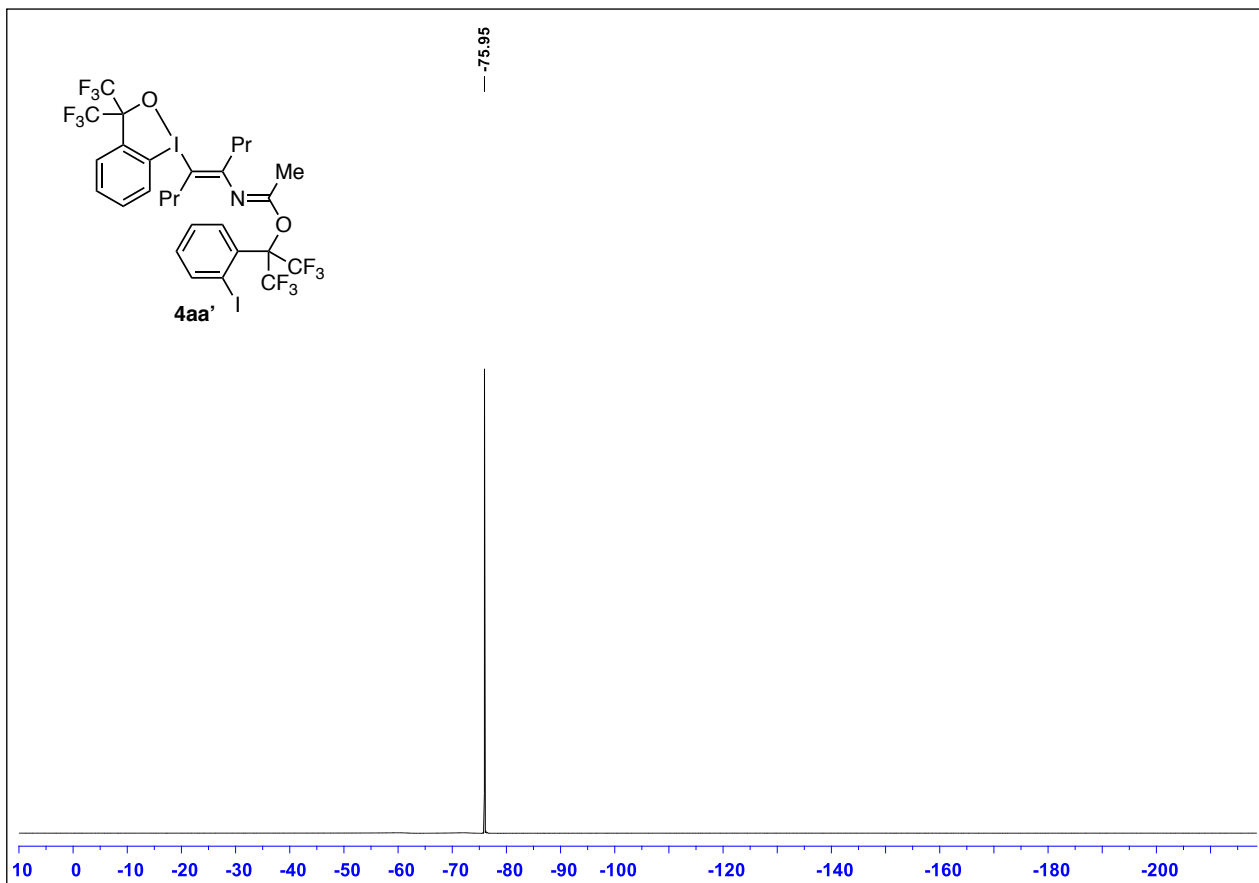

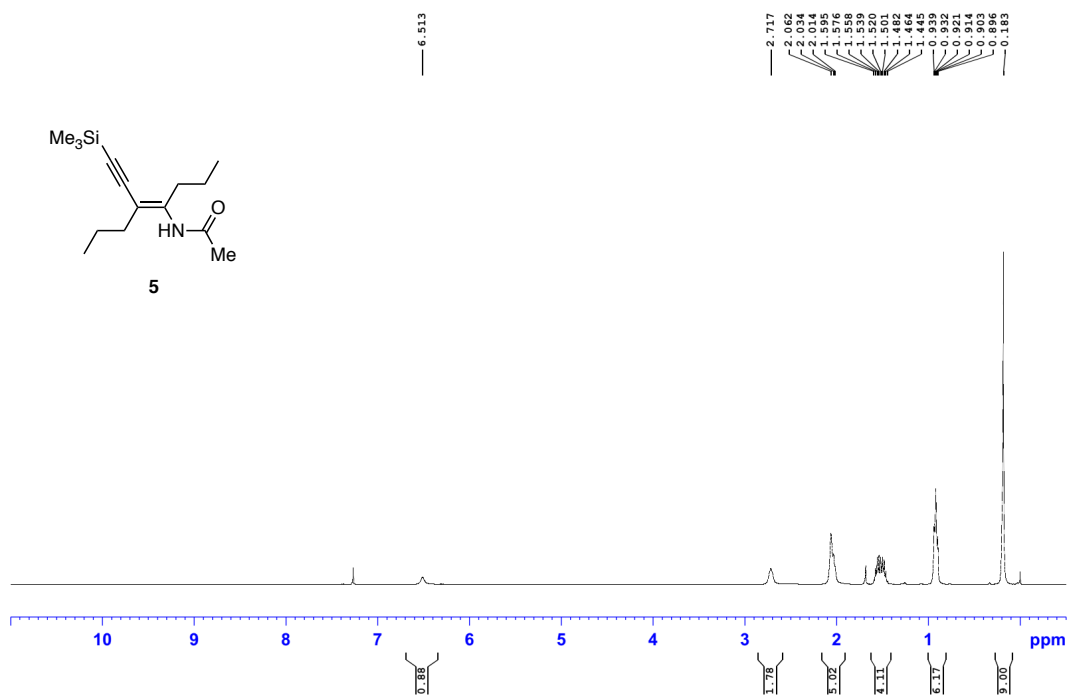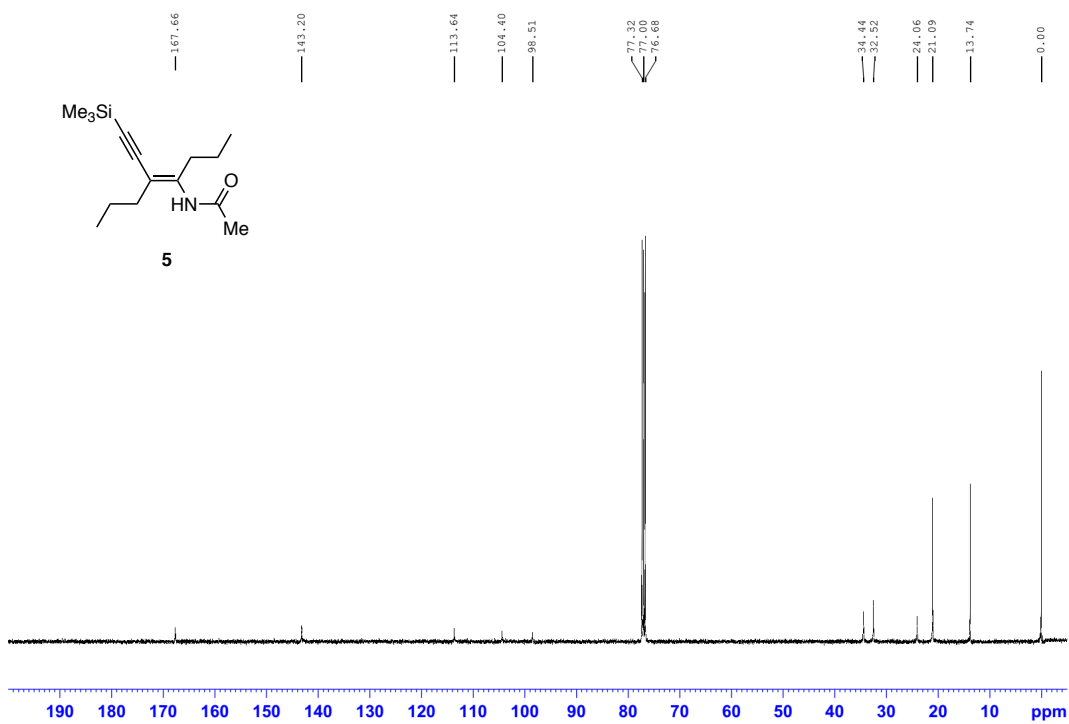

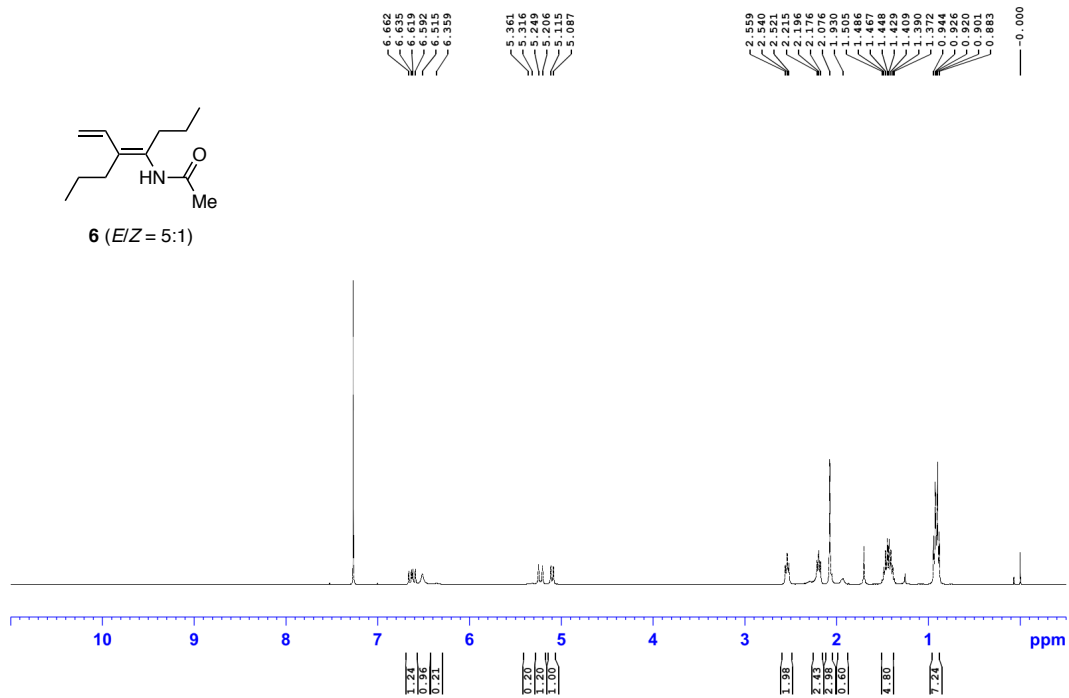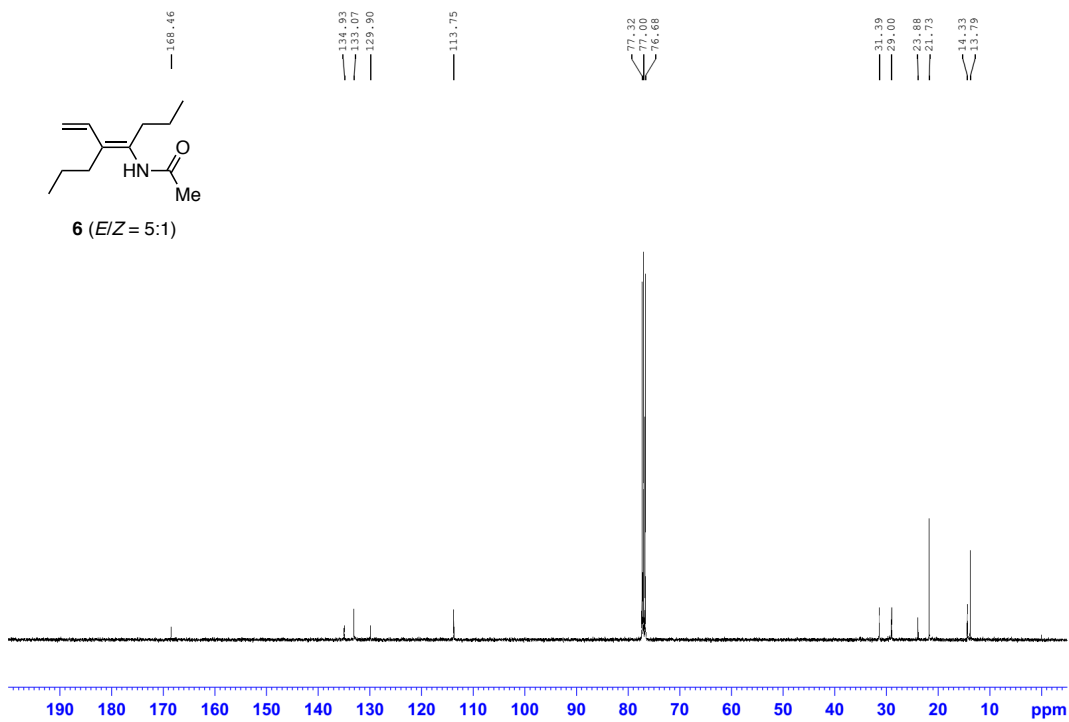

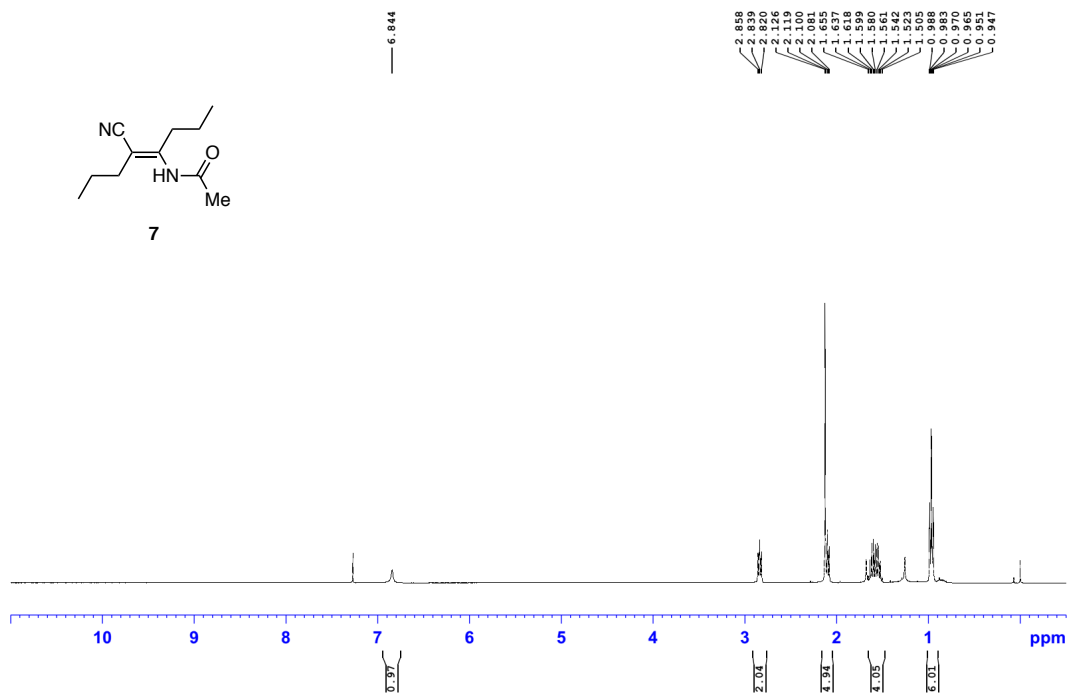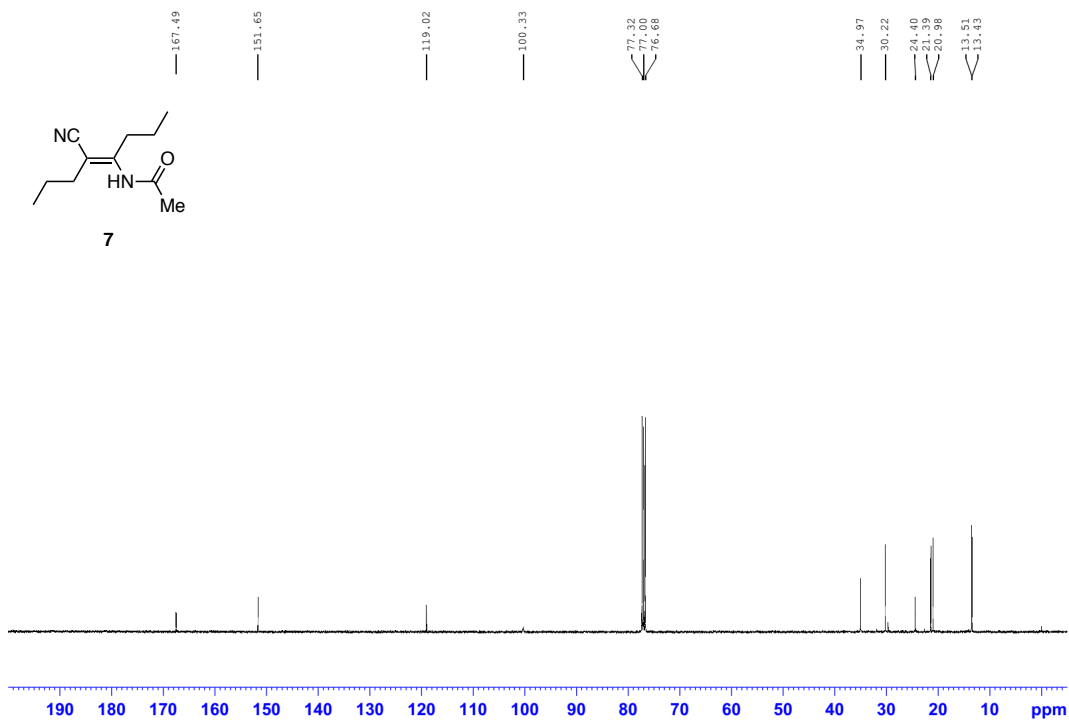

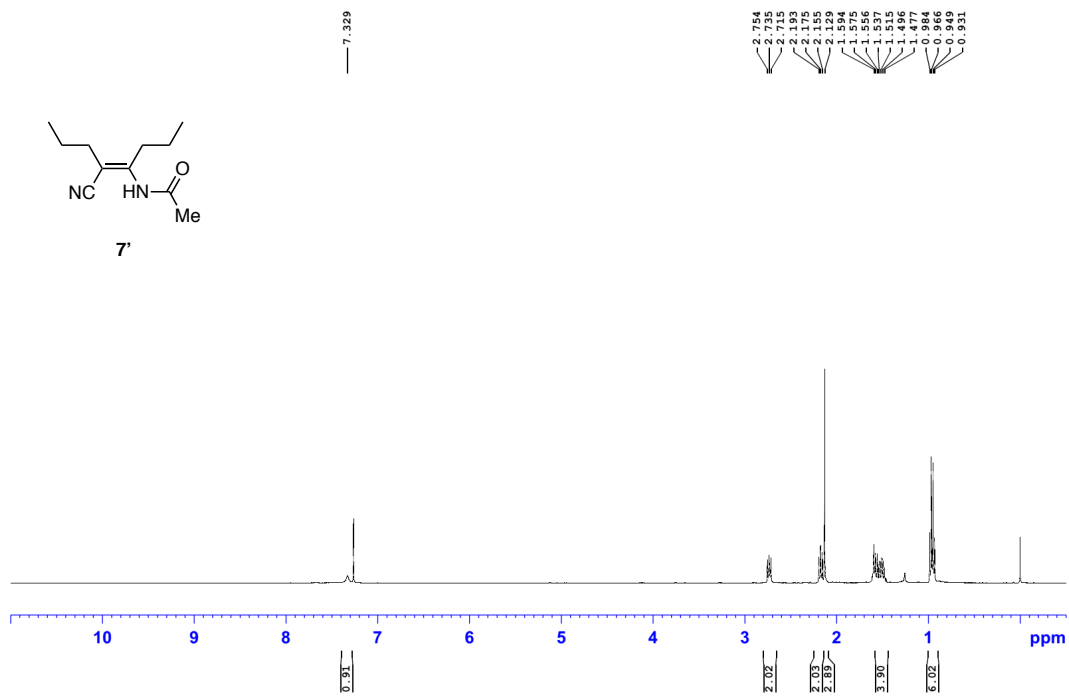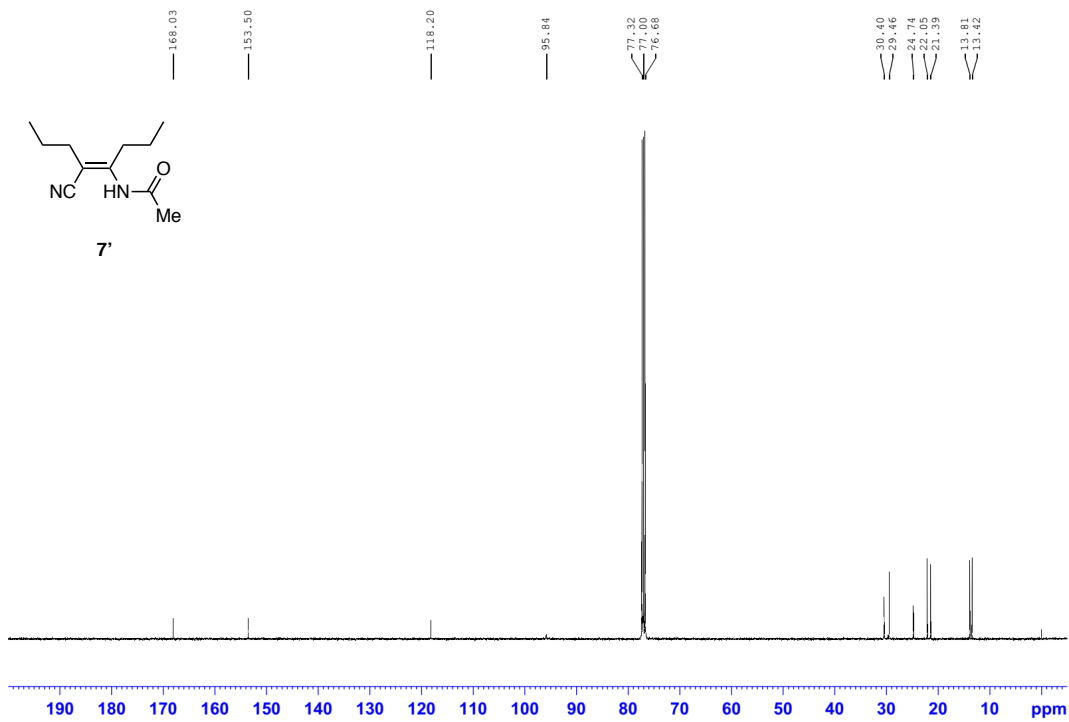



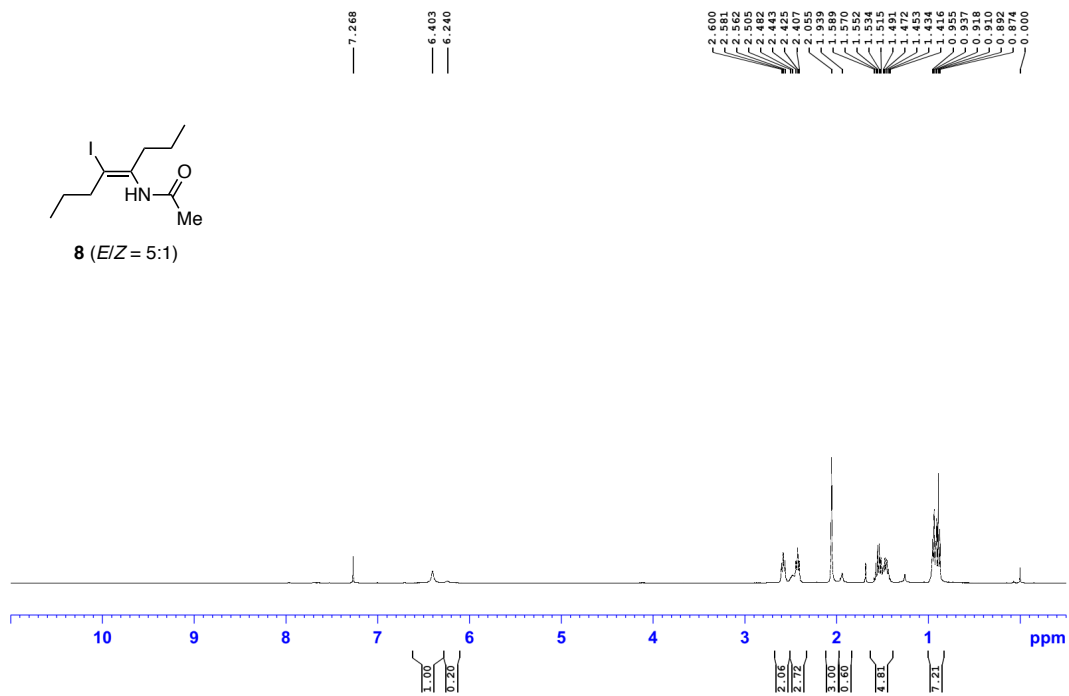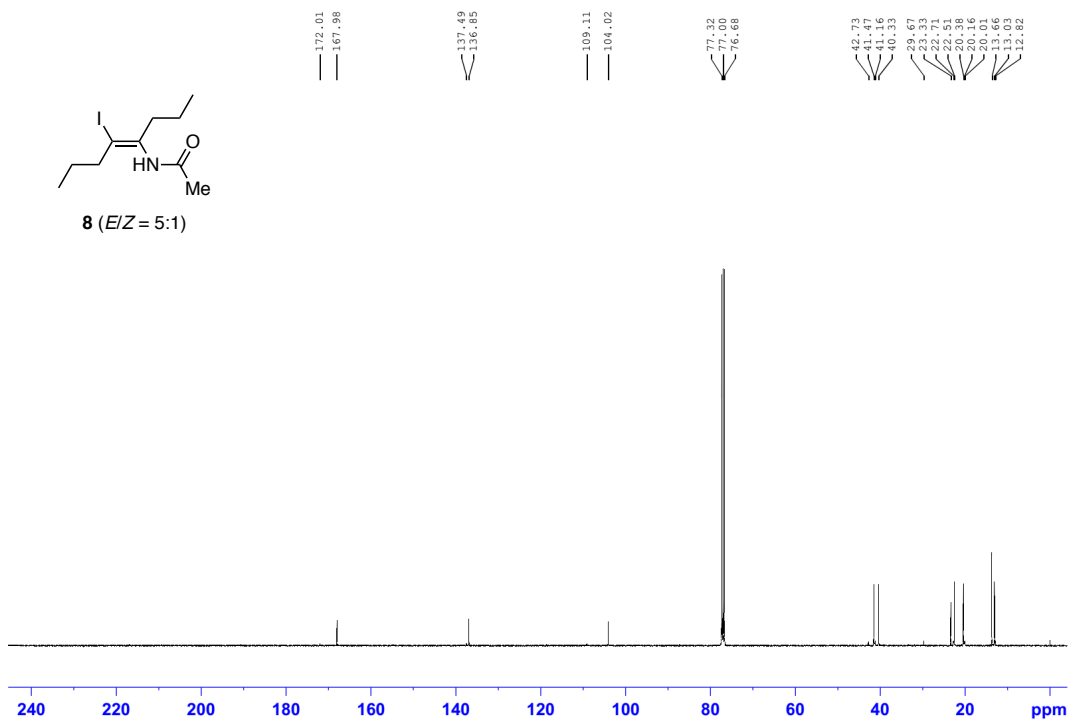

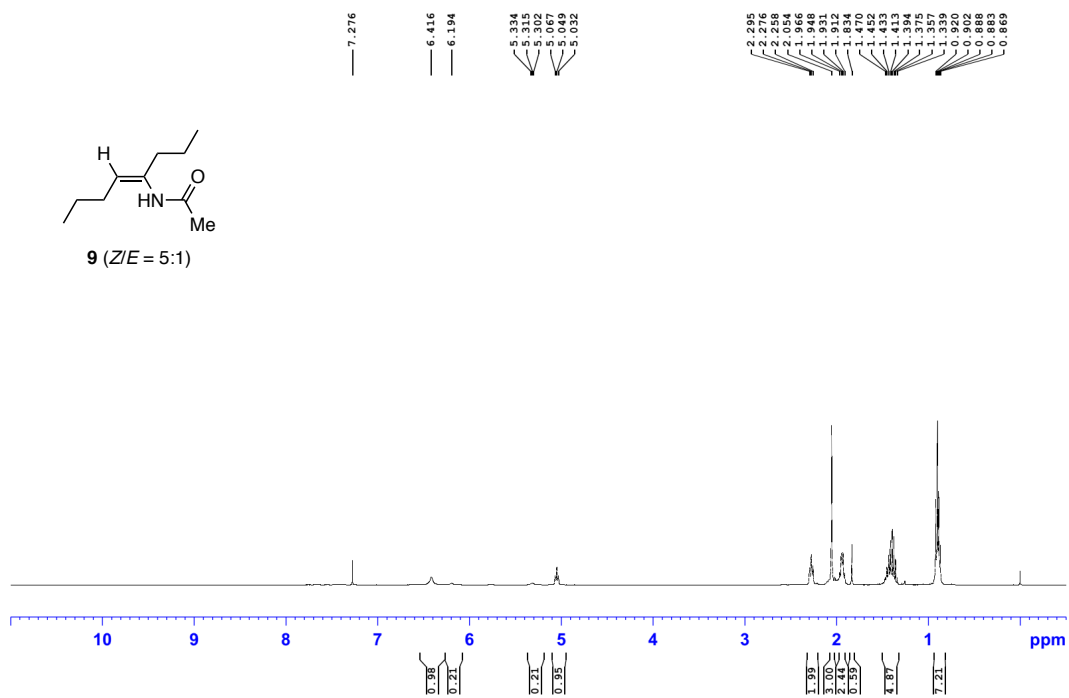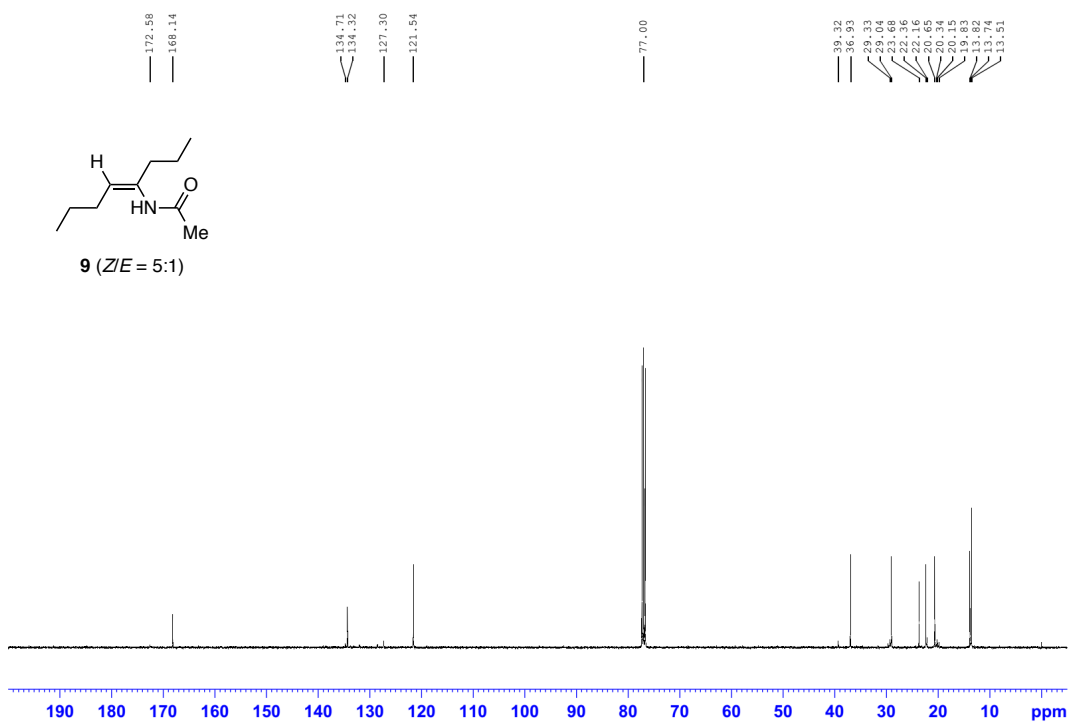

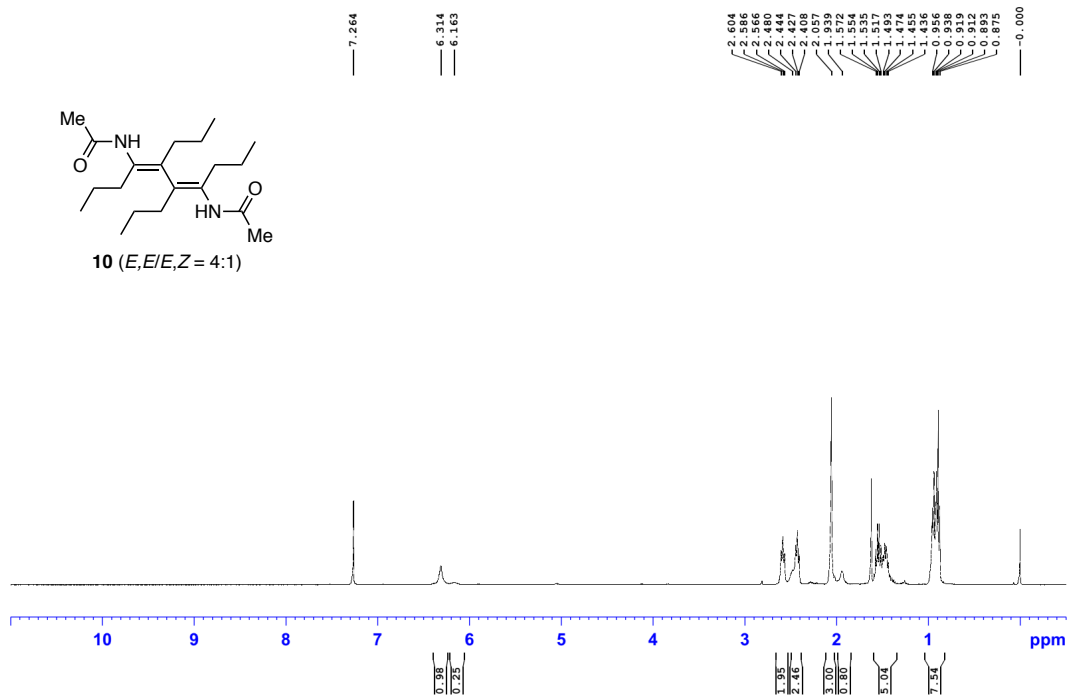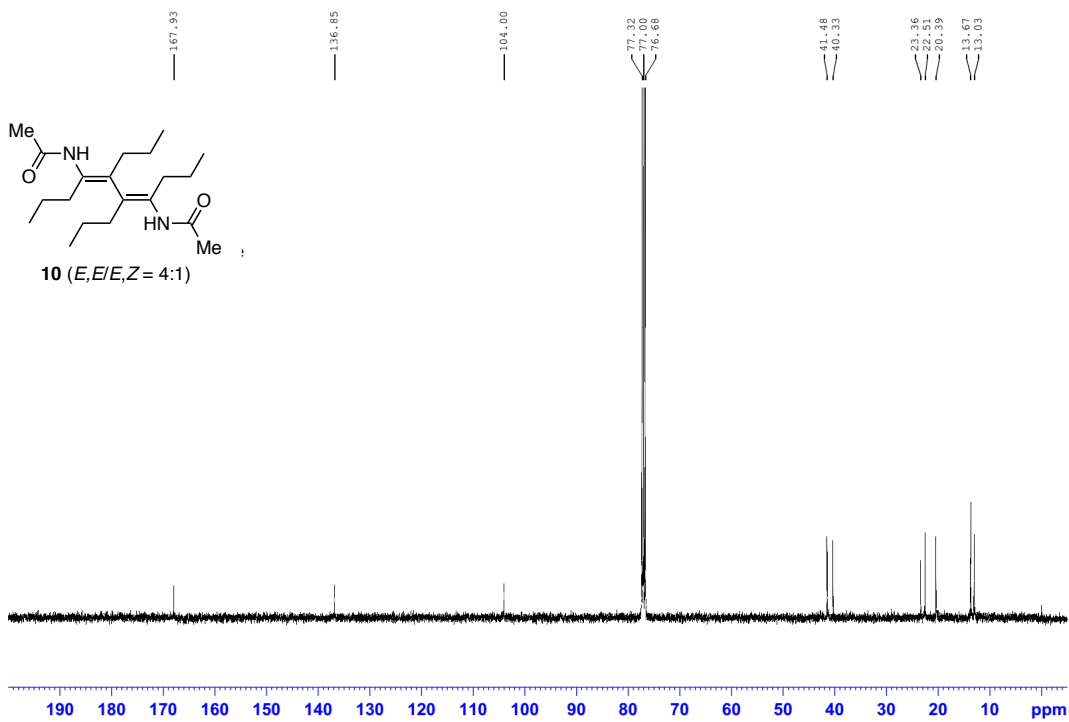

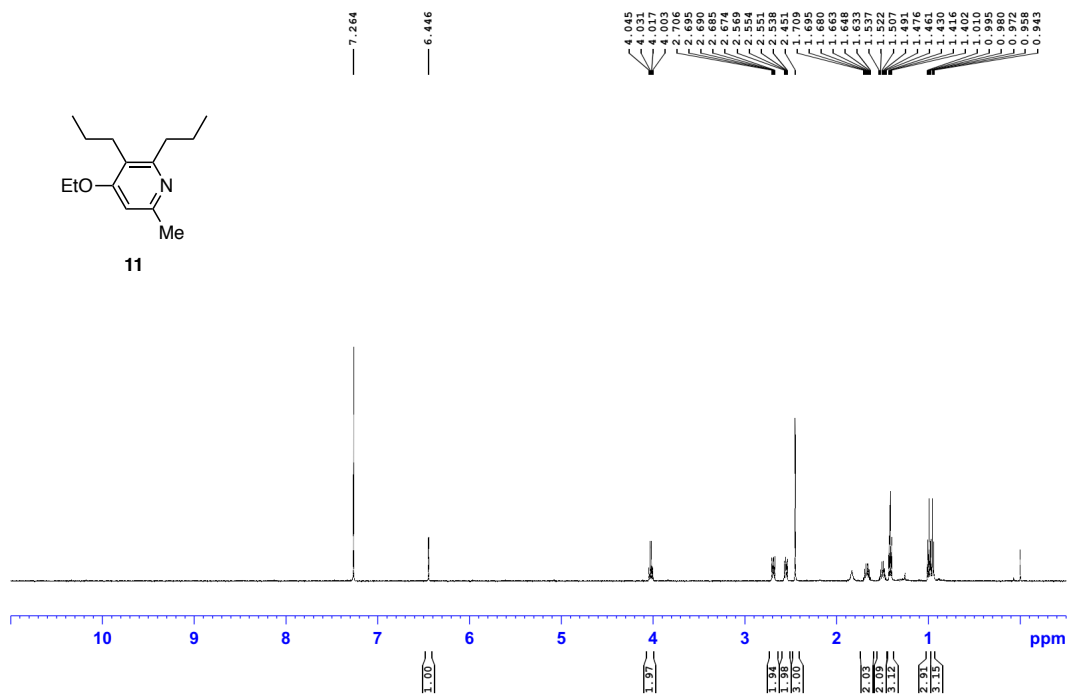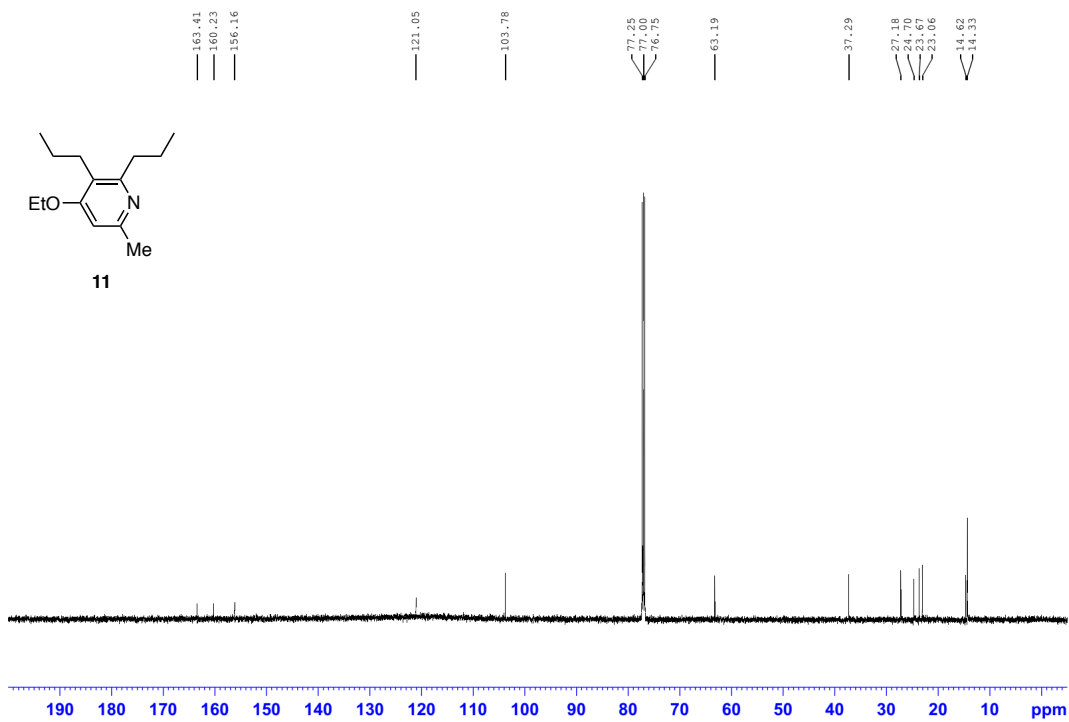

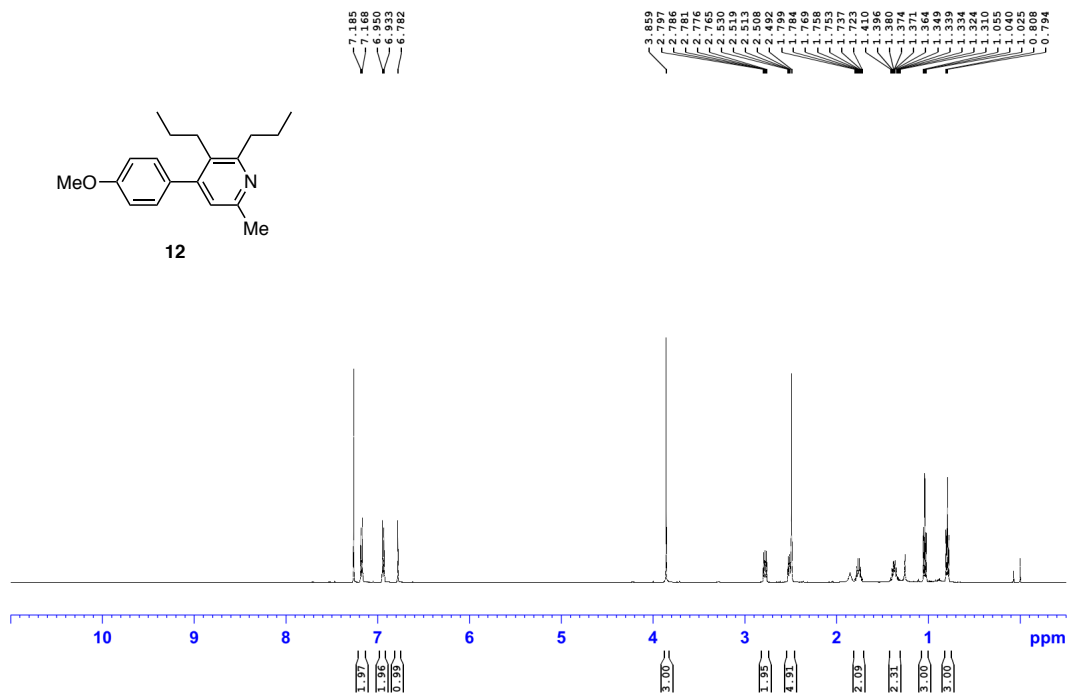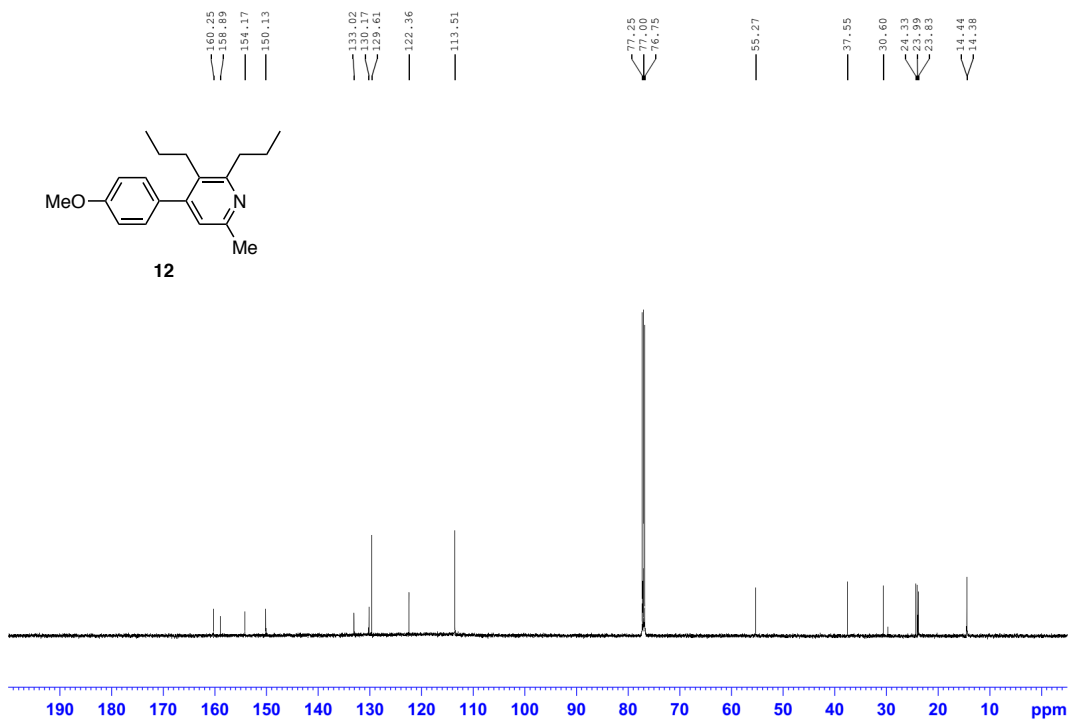

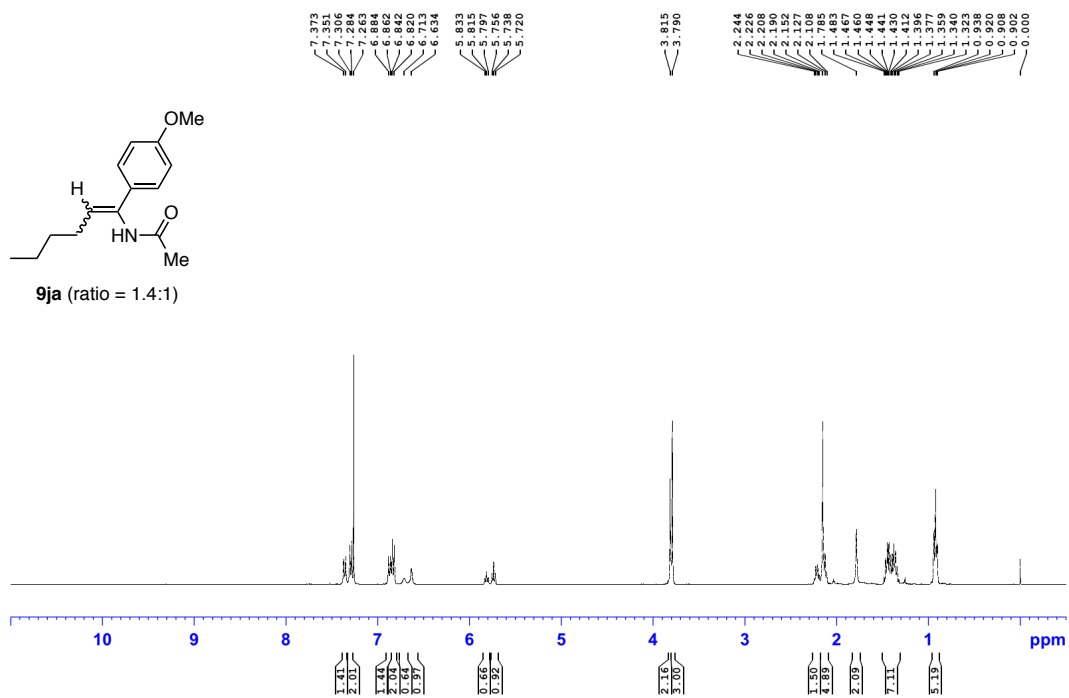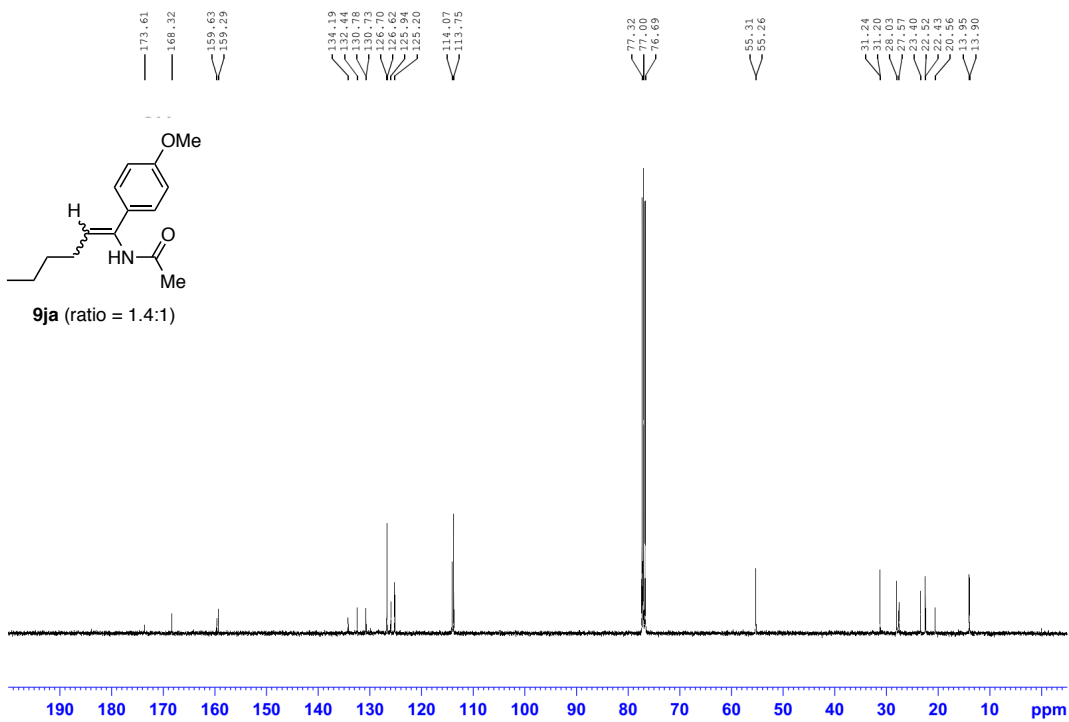

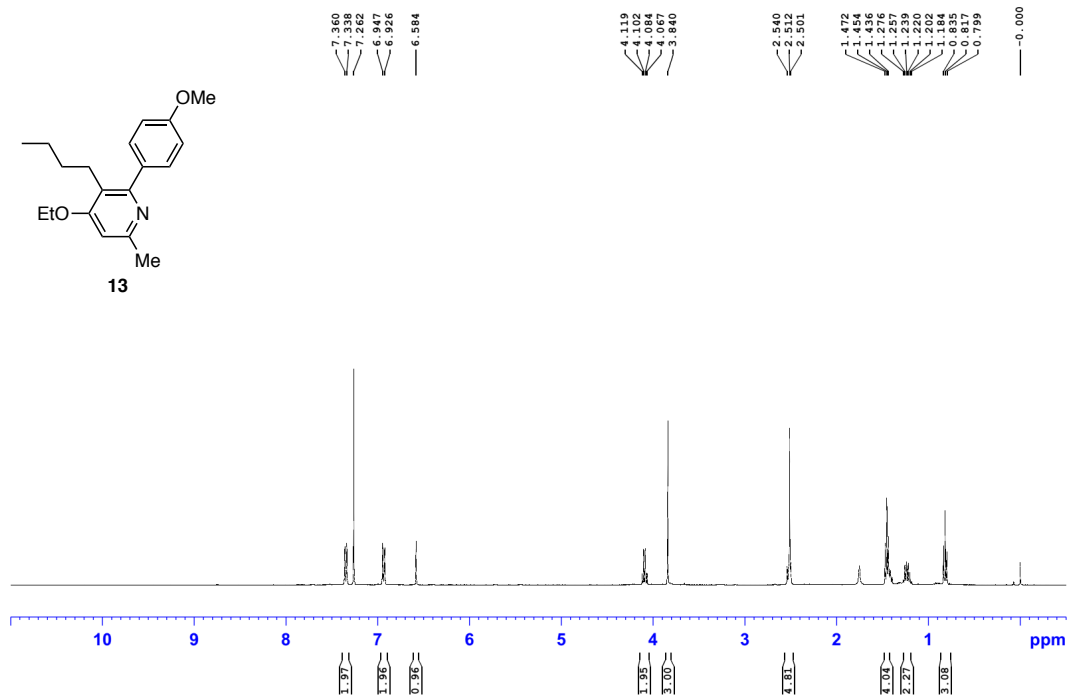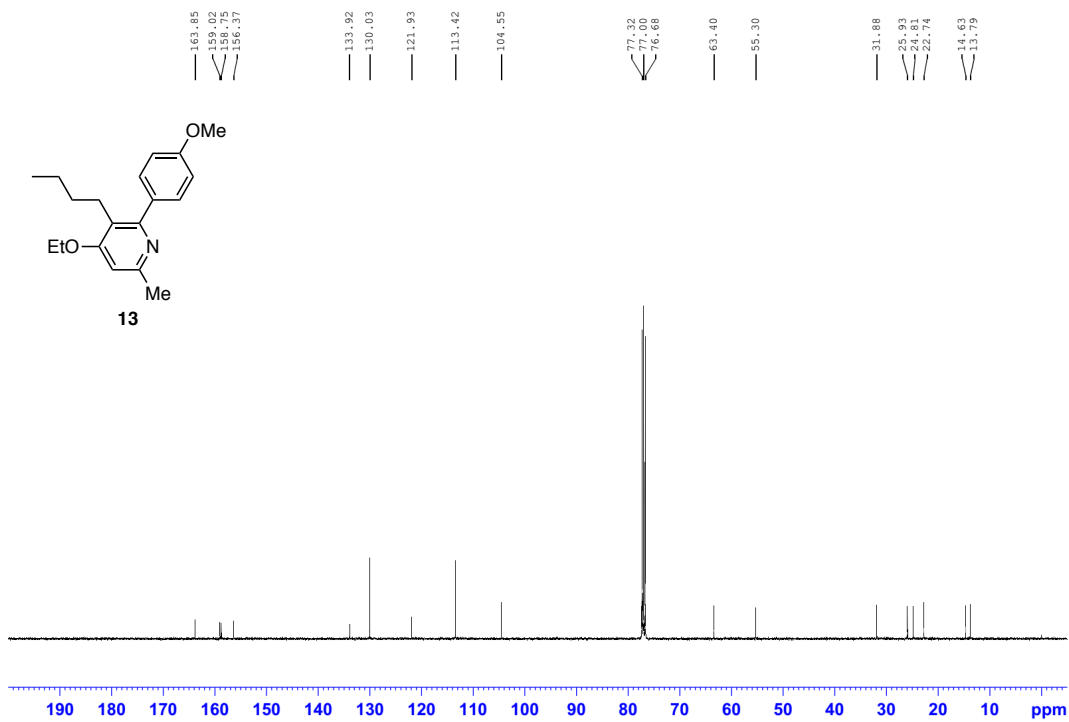

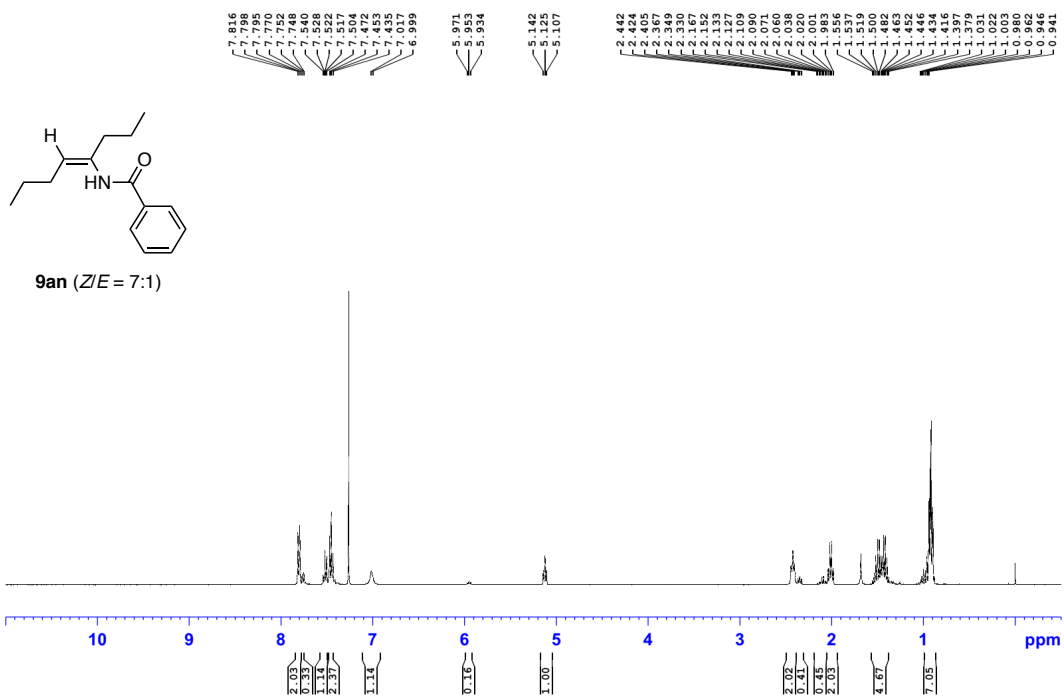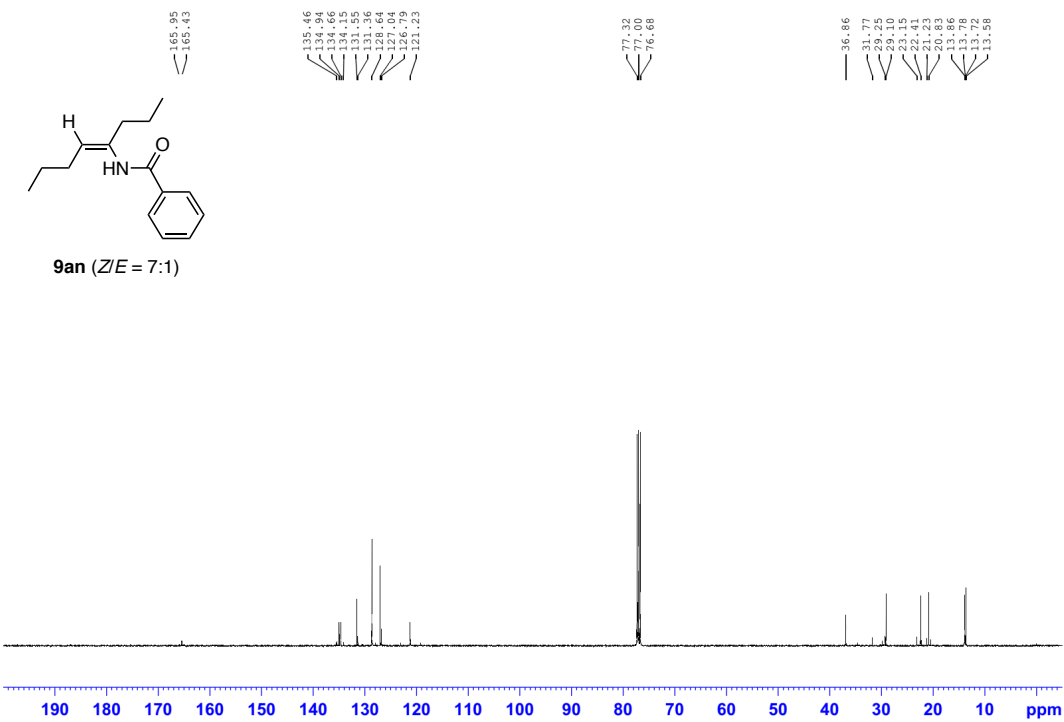



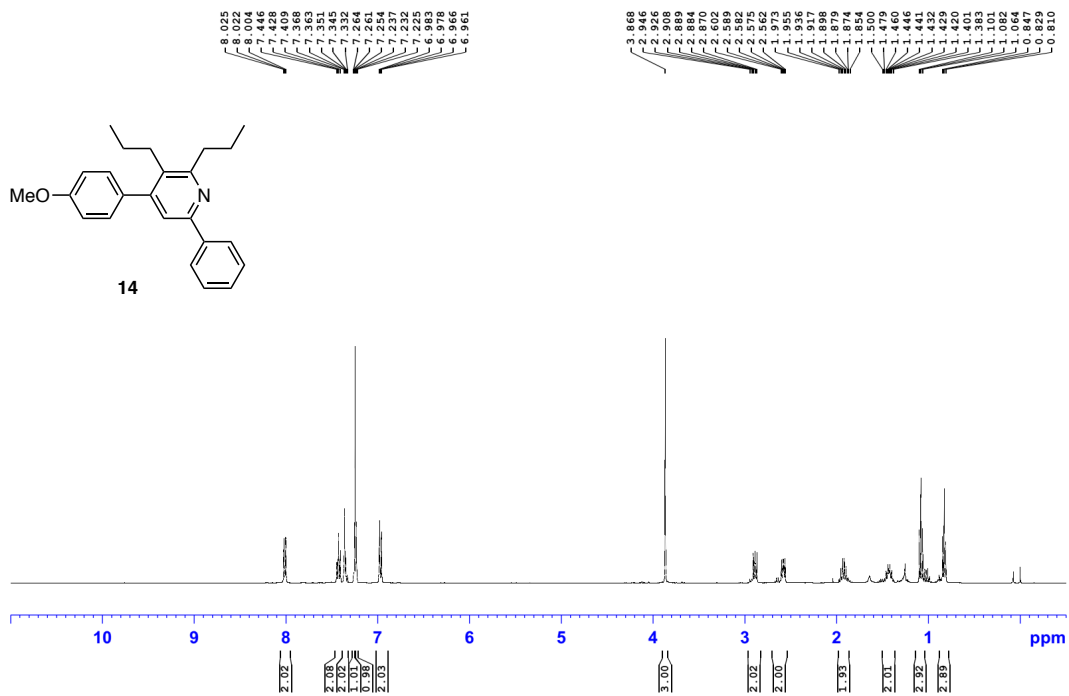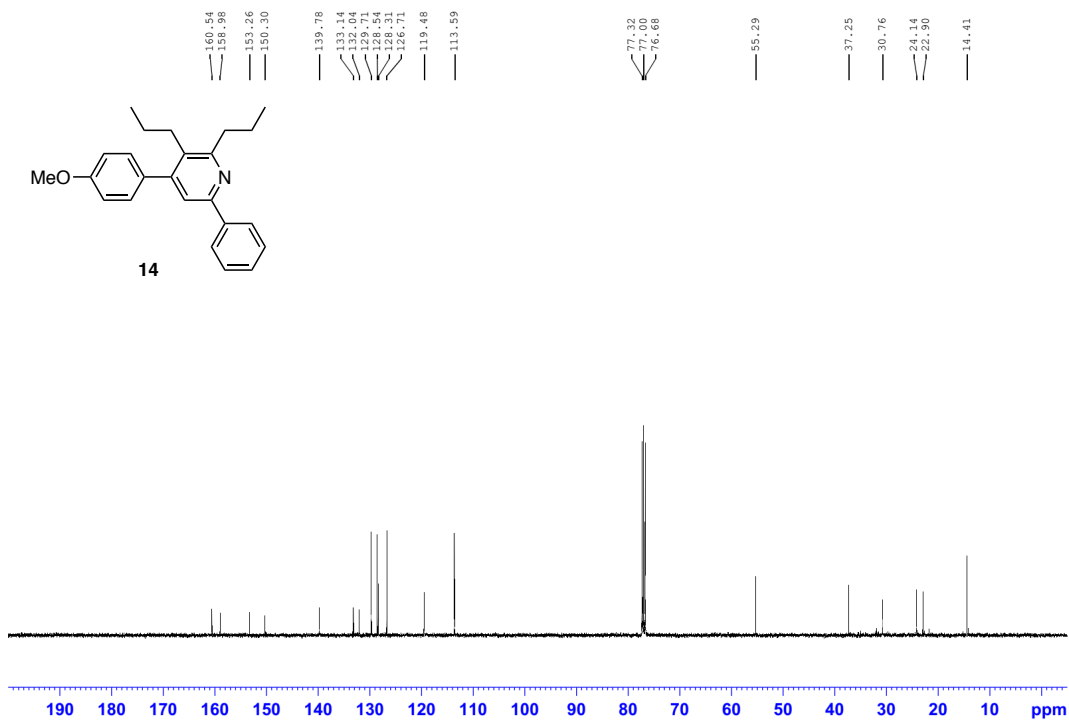

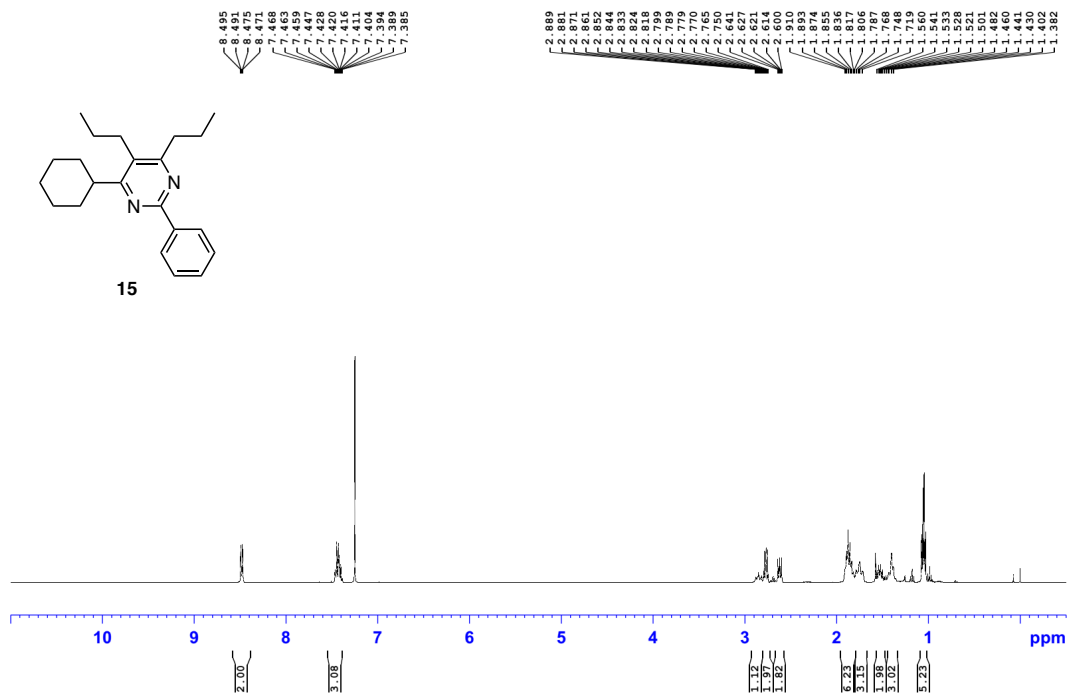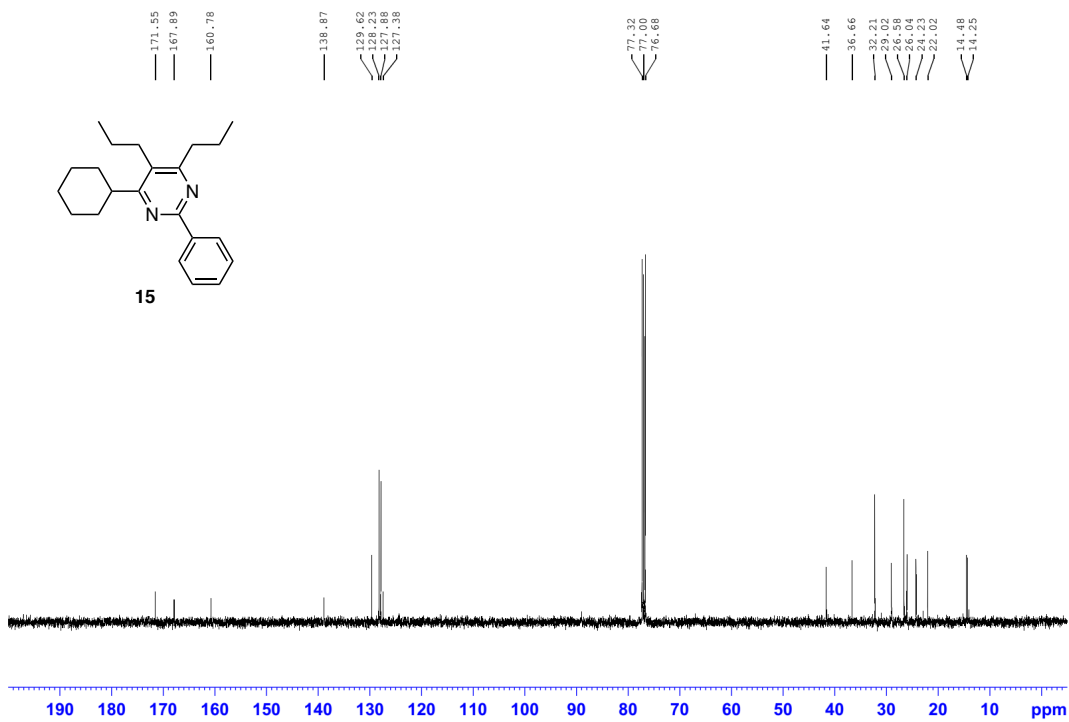

Supplement: d1sc05240c1.pdf [file d1sc05240c1.pdf]
